# Supplementary material for: Si2C5H2isomers – search algorithmsversuschemical intuition
Source: Royal Society of Chemistry journal article supplement (doi:10.1039/c9cp06145b), 2020-01-01
Supplement: c9cp06145b1.pdf [file c9cp06145b1.pdf]

**Supporting information for:**  
**Si<sub>2</sub>C<sub>5</sub>H<sub>2</sub> isomers - Search Algorithms Versus**  
**Chemical Intuition**

Krishnan Thirumoorthy,<sup>†</sup> Andrew L. Cooksy,<sup>‡</sup> and Venkatesan S.  
Thimmakondur<sup>\*,‡</sup>

<sup>†</sup>*Department of Chemistry, School of Advanced Sciences, Vellore Institute of Technology,  
Vellore - 632 014, Tamil Nadu, India.*

<sup>‡</sup>*Department of Chemistry and Biochemistry, San Diego State University, San Diego, CA  
92182-1030, USA.*

E-mail: vthimmakondusamy@sdsu.edu

# Contents

|                                                              |     |
|--------------------------------------------------------------|-----|
| List of Figures                                              | S2  |
| List of Tables                                               | S3  |
| 1 Various Other Isomers of $\text{Si}_2\text{C}_5\text{H}_2$ | S52 |

## List of Figures

|    |                                                                                                                                                                                           |     |
|----|-------------------------------------------------------------------------------------------------------------------------------------------------------------------------------------------|-----|
| S1 | Various structural possibilities obtained for $\text{Si}_2\text{C}_5\text{H}_2$ using the base $\text{C}_7\text{H}_2$ geometry, 1-(buta-1,3-diynyl)cyclopropenyli-<br>dene. . . . .       | S53 |
| S2 | Various structural possibilities obtained for $\text{Si}_2\text{C}_5\text{H}_2$ using the base geometry,<br>1,2-diethynylcyclopropenyli-<br>dene ( $\text{C}_7\text{H}_2$ ) . . . . .     | S55 |
| S3 | Various structural possibilities obtained for $\text{Si}_2\text{C}_5\text{H}_2$ using the base geometry,<br>1-(buta-1,3-diynyl)propadienyli-<br>dene ( $\text{C}_7\text{H}_2$ ) . . . . . | S57 |
| S4 | Various structural possibilities obtained for $\text{Si}_2\text{C}_5\text{H}_2$ using the base $\text{C}_7\text{H}_2$ ge-<br>ometry, buta-1,3-diynylethynylcarbene. . . . .               | S59 |
| S5 | Various structural possibilities obtained for $\text{Si}_2\text{C}_5\text{H}_2$ using the base $\text{C}_7\text{H}_2$ ge-<br>ometry, 1-(ethynyl)pentatetraenyli-<br>dene. . . . .         | S61 |
| S6 | Various structural possibilities obtained for $\text{Si}_2\text{C}_5\text{H}_2$ using the base $\text{C}_7\text{H}_2$ ge-<br>ometry, 1,1-(diethynyl)propadienyli-<br>dene. . . . .        | S63 |
| S7 | Various structural possibilities obtained for $\text{Si}_2\text{C}_5\text{H}_2$ using the base $\text{C}_7\text{H}_2$ ge-<br>ometry, heptahexaenyli-<br>dene. . . . .                     | S65 |
| S8 | Various structural possibilities obtained for $\text{Si}_2\text{C}_5\text{H}_2$ using the base $\text{C}_7\text{H}_2$ ge-<br>ometry, hexatriynyli-<br>dene. . . . .                       | S67 |
| S9 | Various structural possibilities obtained for $\text{Si}_2\text{C}_5\text{H}_2$ using the base $\text{C}_7\text{H}_2$ ge-<br>ometry, <i>bent</i> -1,3,5-hexatriynylcarbene. . . . .       | S70 |

|     |                                                                                                                                                                                                                          |     |
|-----|--------------------------------------------------------------------------------------------------------------------------------------------------------------------------------------------------------------------------|-----|
| S10 | Various structural possibilities obtained for $\text{Si}_2\text{C}_5\text{H}_2$ using the base $\text{C}_7\text{H}_2$ geometry, 3-(didehydrobutatrienylydene)cyclopropene. . . . .                                       | S72 |
| S11 | Various structural possibilities obtained for $\text{Si}_2\text{C}_5\text{H}_2$ using the base $\text{C}_7\text{H}_2$ geometry, 2-(ethynyl)methylenebicyclo[1.1.0]-but-1(3)-ene-4-ylidene. . . . .                       | S74 |
| S12 | Various structural possibilities obtained for $\text{Si}_2\text{C}_5\text{H}_2$ using the base $\text{C}_7\text{H}_2$ geometry, 2-(ethynyl)methylenebicyclo[1.1.0]-but-1(3)-ene-4-ylidene. . . . .                       | S76 |
| S13 | Various structural possibilities obtained for $\text{Si}_2\text{C}_5\text{H}_2$ using the base $\text{C}_7\text{H}_2$ geometry, 2,5-(didehydro)-1-ethynylspiro[2.2]penta-1,4-diene. . . . .                              | S78 |
| S14 | Various structural possibilities obtained for $\text{Si}_2\text{C}_5\text{H}_2$ using the base $\text{C}_7\text{H}_2$ geometry, 2,4-(didehydro)-1-ethynylspiro[2.2]penta-1,4-diene. . . . .                              | S80 |
| S15 | Various structural possibilities obtained for $\text{Si}_2\text{C}_5\text{H}_2$ using the base $\text{C}_5\text{H}_2$ geometry, pentacyclo[2.1.0.0 <sup>1,3</sup> .0 <sup>2,5</sup> .0 <sup>3,5</sup> ]pentane . . . . . | S82 |
| S16 | Various structural possibilities obtained for $\text{Si}_2\text{C}_5\text{H}_2$ using the base $\text{C}_7\text{H}_2$ geometry, 3,5-(didehydro)bicyclo[4.1.0]hepta-1(6),2,4-triene-7-ylidene. . . . .                    | S84 |
| S17 | Various structural possibilities obtained for $\text{Si}_2\text{C}_5\text{H}_2$ using the base $\text{C}_7\text{H}_2$ geometry, bicyclo[4.1.0]hepta-1(6),4(5)-diene-2(3)-yne-7-ylidene. . . . .                          | S86 |
| S18 | Various structural possibilities obtained for $\text{Si}_2\text{C}_5\text{H}_2$ using the base $\text{C}_7\text{H}_2$ geometry, bicyclo[4.1.0]hepta-1,5-diene-3-yne-7-ylidene. . . . .                                   | S88 |
| S19 | Various structural possibilities obtained for $\text{Si}_2\text{C}_5\text{H}_2$ using the base $\text{C}_7\text{H}_2$ geometry, cyclohepta-1,2,3,4-tetraene-6-yne. . . . .                                               | S90 |
| S20 | Various structural possibilities obtained for $\text{Si}_2\text{C}_5\text{H}_2$ using the base $\text{C}_7\text{H}_2$ geometry, bicyclo[4.1.0]hepta-1,2,4,5-tetraene-7-ylidene. . . . .                                  | S92 |

## List of Tables

|    |                                                                                                                                                                            |     |
|----|----------------------------------------------------------------------------------------------------------------------------------------------------------------------------|-----|
| S1 | Computed energies of $\text{Si}_2\text{C}_5\text{H}_2$ isomers in their singlet ground electronic states calculated at the RHF-fc-CCSD(T)/cc-pVTZ level of theory. . . . . | S11 |
|----|----------------------------------------------------------------------------------------------------------------------------------------------------------------------------|-----|

|     |                                                                                                                                                                                                                              |     |
|-----|------------------------------------------------------------------------------------------------------------------------------------------------------------------------------------------------------------------------------|-----|
| S2  | Computed energies of Si <sub>2</sub> C <sub>5</sub> H <sub>2</sub> isomers in their singlet ground electronic states calculated at the B3LYP/6-311++G(2D,2P) level of theory. . . . .                                        | S12 |
| S3  | Computed energies of Si <sub>2</sub> C <sub>5</sub> H <sub>2</sub> isomers in their triplet ground electronic states calculated at the UB3LYP/6-311++G(2D,2P) level of theory. . . . .                                       | S13 |
| S4  | Computed energies of Si <sub>2</sub> C <sub>5</sub> H <sub>2</sub> isomers in their triplet ground electronic states calculated at the UCAM-B3LYP/6-311++G(2D,2P) level of theory. . . . .                                   | S14 |
| S5  | Harmonic vibrational frequencies (cm <sup>-1</sup> ) and IR intensities (km mol <sup>-1</sup> ) of isomer <b>1</b> of Si <sub>2</sub> C <sub>5</sub> H <sub>2</sub> calculated at the fc-CCSD(T)/cc-pVTZ level of theory. .  | S15 |
| S6  | Harmonic vibrational frequencies (cm <sup>-1</sup> ) and IR intensities (km mol <sup>-1</sup> ) of isomer <b>2</b> of Si <sub>2</sub> C <sub>5</sub> H <sub>2</sub> calculated at the fc-CCSD(T)/cc-pVTZ level of theory. .  | S16 |
| S7  | Harmonic vibrational frequencies (cm <sup>-1</sup> ) and IR intensities (km mol <sup>-1</sup> ) of isomer <b>3</b> of Si <sub>2</sub> C <sub>5</sub> H <sub>2</sub> calculated at the fc-CCSD(T)/cc-pVTZ level of theory. .  | S17 |
| S8  | Harmonic vibrational frequencies (cm <sup>-1</sup> ) and IR intensities (km mol <sup>-1</sup> ) of isomer <b>4</b> of Si <sub>2</sub> C <sub>5</sub> H <sub>2</sub> calculated at the fc-CCSD(T)/cc-pVTZ level of theory. .  | S18 |
| S9  | Harmonic vibrational frequencies (cm <sup>-1</sup> ) and IR intensities (km mol <sup>-1</sup> ) of isomer <b>5</b> of Si <sub>2</sub> C <sub>5</sub> H <sub>2</sub> calculated at the fc-CCSD(T)/cc-pVTZ level of theory. .  | S19 |
| S10 | Harmonic vibrational frequencies (cm <sup>-1</sup> ) and IR intensities (km mol <sup>-1</sup> ) of isomer <b>6</b> of Si <sub>2</sub> C <sub>5</sub> H <sub>2</sub> calculated at the fc-CCSD(T)/cc-pVTZ level of theory. .  | S20 |
| S11 | Harmonic vibrational frequencies (cm <sup>-1</sup> ) and IR intensities (km mol <sup>-1</sup> ) of isomer <b>7</b> of Si <sub>2</sub> C <sub>5</sub> H <sub>2</sub> calculated at the fc-CCSD(T)/cc-pVTZ level of theory. .  | S21 |
| S12 | Harmonic vibrational frequencies (cm <sup>-1</sup> ) and IR intensities (km mol <sup>-1</sup> ) of isomer <b>8</b> of Si <sub>2</sub> C <sub>5</sub> H <sub>2</sub> calculated at the fc-CCSD(T)/cc-pVTZ level of theory. .  | S22 |
| S13 | Harmonic vibrational frequencies (cm <sup>-1</sup> ) and IR intensities (km mol <sup>-1</sup> ) of isomer <b>9</b> of Si <sub>2</sub> C <sub>5</sub> H <sub>2</sub> calculated at the fc-CCSD(T)/cc-pVTZ level of theory. .  | S23 |
| S14 | Harmonic vibrational frequencies (cm <sup>-1</sup> ) and IR intensities (km mol <sup>-1</sup> ) of isomer <b>10</b> of Si <sub>2</sub> C <sub>5</sub> H <sub>2</sub> calculated at the fc-CCSD(T)/cc-pVTZ level of theory. . | S24 |



|     |                                                                                                                                                                                                                  |     |
|-----|------------------------------------------------------------------------------------------------------------------------------------------------------------------------------------------------------------------|-----|
| S15 | Harmonic vibrational frequencies ( $\text{cm}^{-1}$ ) and IR intensities ( $\text{km mol}^{-1}$ ) of isomer <b>11</b> of $\text{Si}_2\text{C}_5\text{H}_2$ calculated at the fc-CCSD(T)/cc-pVTZ level of theory. | S25 |
| S16 | Harmonic vibrational frequencies ( $\text{cm}^{-1}$ ) and IR intensities ( $\text{km mol}^{-1}$ ) of isomer <b>12</b> of $\text{Si}_2\text{C}_5\text{H}_2$ calculated at the fc-CCSD(T)/cc-pVTZ level of theory. | S26 |
| S17 | Harmonic vibrational frequencies ( $\text{cm}^{-1}$ ) and IR intensities ( $\text{km mol}^{-1}$ ) of isomer <b>13</b> of $\text{Si}_2\text{C}_5\text{H}_2$ calculated at the fc-CCSD(T)/cc-pVTZ level of theory. | S27 |
| S18 | Harmonic vibrational frequencies ( $\text{cm}^{-1}$ ) and IR intensities ( $\text{km mol}^{-1}$ ) of isomer <b>14</b> of $\text{Si}_2\text{C}_5\text{H}_2$ calculated at the fc-CCSD(T)/cc-pVTZ level of theory. | S28 |
| S19 | Harmonic vibrational frequencies ( $\text{cm}^{-1}$ ) and IR intensities ( $\text{km mol}^{-1}$ ) of isomer <b>15</b> of $\text{Si}_2\text{C}_5\text{H}_2$ calculated at the fc-CCSD(T)/cc-pVTZ level of theory. | S29 |
| S20 | Harmonic vibrational frequencies ( $\text{cm}^{-1}$ ) and IR intensities ( $\text{km mol}^{-1}$ ) of isomer <b>16</b> of $\text{Si}_2\text{C}_5\text{H}_2$ calculated at the fc-CCSD(T)/cc-pVTZ level of theory. | S30 |
| S21 | Harmonic vibrational frequencies ( $\text{cm}^{-1}$ ) and IR intensities ( $\text{km mol}^{-1}$ ) of isomer <b>17</b> of $\text{Si}_2\text{C}_5\text{H}_2$ calculated at the fc-CCSD(T)/cc-pVTZ level of theory. | S31 |
| S22 | Harmonic vibrational frequencies ( $\text{cm}^{-1}$ ) and IR intensities ( $\text{km mol}^{-1}$ ) of isomer <b>18</b> of $\text{Si}_2\text{C}_5\text{H}_2$ calculated at the fc-CCSD(T)/cc-pVTZ level of theory. | S32 |
| S23 | A-reduced Centrifugal Distortion Parameters ( $\perp$ representation; in MHz) of $\text{Si}_2\text{C}_5\text{H}_2$ Isomers Calculated at the fc-CCSD(T)/cc-pVTZ Level of Theory.                                 | S33 |
| S24 | S-reduced Centrifugal Distortion Parameters ( $\perp$ representation; in MHz) of $\text{Si}_2\text{C}_5\text{H}_2$ Isomers Calculated at the fc-CCSD(T)/cc-pVTZ Level of Theory.                                 | S34 |
| S25 | Optimized geometries of the singlet and triplet ground electronic states of isomer <b>1</b> ( $C_{2v}$ ) of $\text{Si}_2\text{C}_5\text{H}_2$ in Cartesian coordinates (in Ångström units) at different levels.  | S35 |
| S26 | Optimized geometries of the singlet and triplet ground electronic states of isomer <b>2</b> ( $C_s$ ) of $\text{Si}_2\text{C}_5\text{H}_2$ in Cartesian coordinates (in Ångström units) at different levels.     | S36 |

|     |                                                                                                                                                                                                                          |     |
|-----|--------------------------------------------------------------------------------------------------------------------------------------------------------------------------------------------------------------------------|-----|
| S27 | Optimized geometries of the singlet and triplet ground electronic states of isomer <b>3</b> ( $C_s$ ) of $\text{Si}_2\text{C}_5\text{H}_2$ in Cartesian coordinates (in Ångström units) at different levels. . . . .     | S37 |
| S28 | Optimized geometries of the singlet and triplet ground electronic states of isomer <b>4</b> ( $C_s$ ) of $\text{Si}_2\text{C}_5\text{H}_2$ in Cartesian coordinates (in Ångström units) at different levels. . . . .     | S38 |
| S29 | Optimized geometries of the singlet and triplet ground electronic states of isomer <b>5</b> ( $C_s$ ) of $\text{Si}_2\text{C}_5\text{H}_2$ in Cartesian coordinates (in Ångström units) at different levels. . . . .     | S39 |
| S30 | Optimized geometries of the singlet and triplet ground electronic states of isomer <b>6</b> ( $C_s$ ) of $\text{Si}_2\text{C}_5\text{H}_2$ in Cartesian coordinates (in Ångström units) at different levels. . . . .     | S40 |
| S31 | Optimized geometries of the singlet and triplet ground electronic states of isomer <b>7</b> ( $C_s$ ) of $\text{Si}_2\text{C}_5\text{H}_2$ in Cartesian coordinates (in Ångström units) at different levels. . . . .     | S41 |
| S32 | Optimized geometries of the singlet and triplet ground electronic states of isomer <b>8</b> ( $C_s$ ) of $\text{Si}_2\text{C}_5\text{H}_2$ in Cartesian coordinates (in Ångström units) at different levels. . . . .     | S42 |
| S33 | Optimized geometries of the singlet and triplet ground electronic states of isomer <b>9</b> ( $C_s$ ) of $\text{Si}_2\text{C}_5\text{H}_2$ in Cartesian coordinates (in Ångström units) at different levels. . . . .     | S43 |
| S34 | Optimized geometries of the singlet and triplet ground electronic states of isomer <b>10</b> ( $C_{2v}$ ) of $\text{Si}_2\text{C}_5\text{H}_2$ in Cartesian coordinates (in Ångström units) at different levels. . . . . | S44 |
| S35 | Optimized geometries of the singlet and triplet ground electronic states of isomer <b>11</b> ( $C_{2v}$ ) of $\text{Si}_2\text{C}_5\text{H}_2$ in Cartesian coordinates (in Ångström units) at different levels. . . . . | S45 |

|     |                                                                                                                                                                                                                          |     |
|-----|--------------------------------------------------------------------------------------------------------------------------------------------------------------------------------------------------------------------------|-----|
| S36 | Optimized geometries of the singlet and triplet ground electronic states of isomer <b>12</b> ( $C_{2v}$ ) of $\text{Si}_2\text{C}_5\text{H}_2$ in Cartesian coordinates (in Ångström units) at different levels. . . . . | S46 |
| S37 | Optimized geometries of the singlet and triplet ground electronic states of isomer <b>13</b> ( $C_s$ ) of $\text{Si}_2\text{C}_5\text{H}_2$ in Cartesian coordinates (in Ångström units) at different levels. . . . .    | S47 |
| S38 | Optimized geometries of the singlet and triplet ground electronic states of isomer <b>14</b> ( $C_{2v}$ ) of $\text{Si}_2\text{C}_5\text{H}_2$ in Cartesian coordinates (in Ångström units) at different levels. . . . . | S48 |
| S39 | Optimized geometries of the singlet and triplet ground electronic states of isomer <b>15</b> ( $C_s$ ) of $\text{Si}_2\text{C}_5\text{H}_2$ in Cartesian coordinates (in Ångström units) at different levels. . . . .    | S49 |
| S40 | Optimized geometries of the singlet and triplet ground electronic states of isomer <b>16</b> ( $C_s$ ) of $\text{Si}_2\text{C}_5\text{H}_2$ in Cartesian coordinates (in Ångström units) at different levels. . . . .    | S50 |
| S41 | Optimized geometries of the singlet and triplet ground electronic states of isomer <b>17</b> ( $C_s$ ) of $\text{Si}_2\text{C}_5\text{H}_2$ in Cartesian coordinates (in Ångström units) at different levels. . . . .    | S51 |
| S42 | Optimized geometries of the singlet and triplet ground electronic states of isomer <b>18</b> ( $C_s$ ) of $\text{Si}_2\text{C}_5\text{H}_2$ in Cartesian coordinates (in Ångström units) at different levels. . . . .    | S52 |
| S43 | Computed energies of $\text{Si}_2\text{C}_5\text{H}_2$ isomers shown in Figure S1 in their singlet ground electronic states calculated at the B3LYP/6-311++G(2D,2P) level of theory. . . . .                             | S54 |
| S44 | Computed energies of $\text{Si}_2\text{C}_5\text{H}_2$ isomers shown in Figure S2 in their singlet ground electronic states calculated at the B3LYP/6-311++G(2D,2P) level of theory. . . . .                             | S56 |

|     |                                                                                                                                                                                               |     |
|-----|-----------------------------------------------------------------------------------------------------------------------------------------------------------------------------------------------|-----|
| S45 | Computed energies of $\text{Si}_2\text{C}_5\text{H}_2$ isomers shown in Figure S3 in their singlet ground electronic states calculated at the B3LYP/6-311++G(2D,2P) level of theory. . . . .  | S58 |
| S46 | Computed energies of $\text{Si}_2\text{C}_5\text{H}_2$ isomers shown in Figure S4 in their singlet ground electronic states calculated at the B3LYP/6-311++G(2D,2P) level of theory. . . . .  | S60 |
| S47 | Computed energies of $\text{Si}_2\text{C}_5\text{H}_2$ isomers shown in Figure S5 in their singlet ground electronic states calculated at the B3LYP/6-311++G(2D,2P) level of theory. . . . .  | S62 |
| S48 | Computed energies of $\text{Si}_2\text{C}_5\text{H}_2$ isomers shown in Figure S6 in their singlet ground electronic states calculated at the B3LYP/6-311++G(2D,2P) level of theory. . . . .  | S64 |
| S49 | Computed energies of $\text{Si}_2\text{C}_5\text{H}_2$ isomers shown in Figure S7 in their singlet ground electronic states calculated at the B3LYP/6-311++G(2D,2P) level of theory. . . . .  | S66 |
| S50 | Computed energies of $\text{Si}_2\text{C}_5\text{H}_2$ isomers shown in Figure S8 in their triplet ground electronic states calculated at the UB3LYP/6-311++G(2D,2P) level of theory. . . . . | S68 |
| S51 | Computed energies of $\text{Si}_2\text{C}_5\text{H}_2$ isomers shown in Figure S8 in their singlet ground electronic states calculated at the B3LYP/6-311++G(2D,2P) level of theory. . . . .  | S69 |
| S52 | Computed energies of $\text{Si}_2\text{C}_5\text{H}_2$ isomers shown in Figure S9 in their singlet ground electronic states calculated at the B3LYP/6-311++G(2D,2P) level of theory. . . . .  | S71 |
| S53 | Computed energies of $\text{Si}_2\text{C}_5\text{H}_2$ isomers shown in Figure S10 in their singlet ground electronic states calculated at the B3LYP/6-311++G(2D,2P) level of theory. . . . . | S73 |

|     |                                                                                                                                                                                               |     |
|-----|-----------------------------------------------------------------------------------------------------------------------------------------------------------------------------------------------|-----|
| S54 | Computed energies of $\text{Si}_2\text{C}_5\text{H}_2$ isomers shown in Figure S11 in their singlet ground electronic states calculated at the B3LYP/6-311++G(2D,2P) level of theory. . . . . | S75 |
| S55 | Computed energies of $\text{Si}_2\text{C}_5\text{H}_2$ isomers shown in Figure S12 in their singlet ground electronic states calculated at the B3LYP/6-311++G(2D,2P) level of theory. . . . . | S77 |
| S56 | Computed energies of $\text{Si}_2\text{C}_5\text{H}_2$ isomers shown in Figure S13 in their singlet ground electronic states calculated at the B3LYP/6-311++G(2D,2P) level of theory. . . . . | S79 |
| S57 | Computed energies of $\text{Si}_2\text{C}_5\text{H}_2$ isomers shown in Figure S14 in their singlet ground electronic states calculated at the B3LYP/6-311++G(2D,2P) level of theory. . . . . | S81 |
| S58 | Computed energies of $\text{Si}_2\text{C}_5\text{H}_2$ isomers shown in Figure S15 in their singlet ground electronic states calculated at the B3LYP/6-311++G(2D,2P) level of theory. . . . . | S83 |
| S59 | Computed energies of $\text{Si}_2\text{C}_5\text{H}_2$ isomers shown in Figure S16 in their singlet ground electronic states calculated at the B3LYP/6-311++G(2D,2P) level of theory. . . . . | S85 |
| S60 | Computed energies of $\text{Si}_2\text{C}_5\text{H}_2$ isomers shown in Figure S17 in their singlet ground electronic states calculated at the B3LYP/6-311++G(2D,2P) level of theory. . . . . | S87 |
| S61 | Computed energies of $\text{Si}_2\text{C}_5\text{H}_2$ isomers shown in Figure S18 in their singlet ground electronic states calculated at the B3LYP/6-311++G(2D,2P) level of theory. . . . . | S89 |
| S62 | Computed energies of $\text{Si}_2\text{C}_5\text{H}_2$ isomers shown in Figure S19 in their singlet ground electronic states calculated at the B3LYP/6-311++G(2D,2P) level of theory. . . . . | S91 |

S63 Computed energies of  $\text{Si}_2\text{C}_5\text{H}_2$  isomers shown in Figure S20 in their singlet ground electronic states calculated at the B3LYP/6-311++G(2D,2P) level of theory. . . . . S93

Table S1: Computed energies of Si<sub>2</sub>C<sub>5</sub>H<sub>2</sub> isomers in their singlet ground electronic states calculated at the RHF-fc-CCSD(T)/cc-pVTZ level of theory.

| Isomer | Point<br>Group | $E$<br>a.u    | $ZPVE$<br>kcal mol <sup>-1</sup> | $E+ZPVE$<br>a.u | $\mu$<br>Debye | $\Delta E$<br>kcal mol <sup>-1</sup> | $\Delta E+ZPVE$<br>kcal mol <sup>-1</sup> | NImag |
|--------|----------------|---------------|----------------------------------|-----------------|----------------|--------------------------------------|-------------------------------------------|-------|
| 1      | $C_{2v}$       | -769.34455300 | 31.1338                          | -769.29493818   | 0.39           | 0.00                                 | 0.00                                      | 0     |
| 2      | $C_s$          | -769.30700346 | 28.9567                          | -769.26085806   | 0.55           | 23.56                                | 21.39                                     | 0     |
| 3      | $C_s$          | -769.30622036 | 29.0254                          | -769.25996548   | 0.86           | 24.05                                | 21.95                                     | 0     |
| 4      | $C_s$          | -769.30650635 | 30.0193                          | -769.25866759   | 1.98           | 23.87                                | 22.76                                     | 0     |
| 5      | $C_s$          | -769.30080521 | 28.4226                          | -769.25551095   | 1.92           | 27.45                                | 24.74                                     | 0     |
| 6      | $C_s$          | -769.30228227 | 29.9493                          | -769.25455507   | 3.47           | 26.53                                | 25.34                                     | 0     |
| 7      | $C_s$          | -769.30051910 | 29.1418                          | -769.25407873   | 1.57           | 27.63                                | 25.64                                     | 0     |
| 8      | $C_s$          | -769.29942591 | 28.6063                          | -769.25383891   | 0.84           | 28.32                                | 25.79                                     | 0     |
| 9      | $C_s$          | -769.29751788 | 28.8234                          | -769.25158491   | 0.73           | 29.51                                | 27.20                                     | 0     |
| 10     | $C_{2v}$       | -769.29225878 | 26.9136                          | -769.24936927   | 1.11           | 32.82                                | 28.59                                     | 0     |
| 11     | $C_{2v}$       | -769.29227928 | 27.4920                          | -769.24846803   | 0.87           | 32.80                                | 29.16                                     | 0     |
| 12     | $C_s$          | -769.29198611 | 28.7788                          | -769.24612421   | 1.95           | 32.99                                | 30.63                                     | 0     |
| 13     | $C_s$          | -769.28807432 | 27.3746                          | -769.24445016   | 2.88           | 35.44                                | 31.68                                     | 0     |
| 14     | $C_{2v}$       | -769.28676187 | 26.9674                          | -769.24378662   | 2.19           | 36.26                                | 32.10                                     | 0     |
| 15     | $C_s$          | -769.28745482 | 28.2094                          | -769.24250032   | 0.66           | 35.83                                | 32.91                                     | 0     |
| 16     | $C_s$          | -769.28988467 | 30.0366                          | -769.24201834   | 2.01           | 34.30                                | 33.21                                     | 0     |
| 17     | $C_s$          | -769.28351058 | 27.4983                          | -769.23968929   | 1.45           | 38.30                                | 34.67                                     | 0     |
| 18     | $C_s$          | -769.27766241 | 28.9700                          | -769.23149582   | 1.67           | 41.97                                | 39.81                                     | 0     |

Table S2: Computed energies of Si<sub>2</sub>C<sub>5</sub>H<sub>2</sub> isomers in their singlet ground electronic states calculated at the B3LYP/6-311++G(2D,2P) level of theory.

| Isomer    | Point<br>Group | $E$<br>a.u   | $ZPVE$<br>a.u | $E+ZPVE$<br>a.u | $\Delta E+ZPVE$<br>kcal mol <sup>-1</sup> | NImag |
|-----------|----------------|--------------|---------------|-----------------|-------------------------------------------|-------|
| <b>1</b>  | $C_{2v}$       | -770.6783795 | 0.049725      | -770.628654     | 0.00                                      | 0     |
| <b>2</b>  | $C_s$          | -770.6473552 | 0.046621      | -770.600734     | 17.52                                     | 0     |
| <b>3</b>  | $C_s$          | -770.6467098 | 0.046777      | -770.599932     | 18.02                                     | 0     |
| <b>4</b>  | $C_s$          | -770.6468126 | 0.048113      | -770.598699     | 18.80                                     | 0     |
| <b>5</b>  | $C_s$          | -770.6405389 | 0.045596      | -770.594943     | 21.15                                     | 0     |
| <b>6</b>  | $C_s$          | -770.6366832 | 0.047858      | -770.588825     | 24.99                                     | 0     |
| <b>7</b>  | $C_s$          | -770.6434194 | 0.046796      | -770.596623     | 20.10                                     | 0     |
| <b>8</b>  | $C_s$          | -770.6366782 | 0.045878      | -770.590800     | 23.75                                     | 0     |
| <b>9</b>  | $C_s$          | -770.6459363 | 0.046502      | -770.599435     | 18.34                                     | 0     |
| <b>10</b> | $C_{2v}$       | -770.6408517 | 0.043746      | -770.597106     | 19.80                                     | 0     |
| <b>11</b> | $C_{2v}$       | -770.6388129 | 0.044781      | -770.594032     | 21.73                                     | 0     |
| <b>12</b> | $C_s$          | -770.6323326 | 0.046074      | -770.586259     | 26.60                                     | 0     |
| <b>13</b> | $C_s$          | -770.6281327 | 0.044012      | -770.584120     | 27.95                                     | 0     |
| <b>14</b> | $C_{2v}$       | -770.6303640 | 0.043823      | -770.586541     | 26.43                                     | 0     |
| <b>15</b> | $C_s$          | -770.6297575 | 0.045459      | -770.584299     | 27.83                                     | 0     |
| <b>16</b> | $C_s$          | -770.6300475 | 0.048269      | -770.581779     | 29.41                                     | 0     |
| <b>17</b> | $C_s$          | -770.6253429 | 0.044247      | -770.581096     | 29.84                                     | 0     |
| <b>18</b> | $C_s$          | -770.6290167 | 0.046505      | -770.582512     | 28.95                                     | 0     |



Table S3: Computed energies of Si<sub>2</sub>C<sub>5</sub>H<sub>2</sub> isomers in their triplet ground electronic states calculated at the UB3LYP/6-311++G(2D,2P) level of theory.

| Isomer    | Point<br>Group | $E$<br>a.u   | $ZPVE$<br>a.u | $E+ZPVE$<br>a.u | $\Delta E+ZPVE$<br>kcal mol <sup>-1</sup> | NImag |
|-----------|----------------|--------------|---------------|-----------------|-------------------------------------------|-------|
| <b>1</b>  | $C_{2v}$       | -770.5593138 | 0.045813      | -770.513501     | 26.61                                     | 3     |
| <b>2</b>  | $C_s$          | -770.5919917 | 0.044217      | -770.547775     | 5.10                                      | 0     |
| <b>3</b>  | $C_s$          | -770.5908066 | 0.044335      | -770.546471     | 5.92                                      | 0     |
| <b>4</b>  | $C_s$          | -770.5998711 | 0.048020      | -770.551851     | 2.54                                      | 0     |
| <b>5</b>  | $C_s$          | -770.5493823 | 0.043089      | -770.506293     | 31.13                                     | 0     |
| <b>6</b>  | $C_s$          | -770.5901774 | 0.047850      | -770.542327     | 8.52                                      | 1     |
| <b>7</b>  | $C_s$          | -770.6028184 | 0.047091      | -770.555728     | 0.11                                      | 0     |
| <b>8</b>  | $C_s$          | -770.5458270 | 0.043819      | -770.502008     | 33.82                                     | 0     |
| <b>9</b>  | $C_s$          | -770.5973847 | 0.043930      | -770.553455     | 1.53                                      | 1     |
| <b>10</b> | $C_{2v}$       | -770.5654589 | 0.040228      | -770.525231     | 19.24                                     | 1     |
| <b>11</b> | $C_{2v}$       | -770.5879971 | 0.042225      | -770.545772     | 6.35                                      | 2     |
| <b>12</b> | $C_s$          | -770.6031721 | 0.047273      | -770.555899     | 0.00                                      | 0     |
| <b>13</b> | $C_s$          | -770.5530911 | 0.042905      | -770.510186     | 28.69                                     | 0     |
| <b>14</b> | $C_{2v}$       | -770.5734208 | 0.043028      | -770.530392     | 16.01                                     | 0     |
| <b>15</b> | $C_s$          | -770.5775491 | 0.042831      | -770.534718     | 13.29                                     | 1     |
| <b>16</b> | $C_s$          | -770.5800925 | 0.046639      | -770.533453     | 14.09                                     | 0     |
| <b>17</b> | $C_s$          | -770.5485300 | 0.041919      | -770.506611     | 30.93                                     | 1     |
| <b>18</b> | $C_s$          | -770.5896180 | 0.044982      | -770.544636     | 7.07                                      | 1     |

Table S4: Computed energies of Si<sub>2</sub>C<sub>5</sub>H<sub>2</sub> isomers in their triplet ground electronic states calculated at the UCAM-B3LYP/6-311++G(2D,2P) level of theory.

| Isomer    | Point<br>Group | $E$<br>a.u   | $ZPVE$<br>a.u | $E+ZPVE$<br>a.u | $\Delta E+ZPVE$<br>kcal mol <sup>-1</sup> | NImag |
|-----------|----------------|--------------|---------------|-----------------|-------------------------------------------|-------|
| <b>1</b>  | $C_{2v}$       | -770.4042262 | 0.045765      | -770.358461     | 30.33                                     | 2     |
| <b>2</b>  | $C_s$          | -770.4420825 | 0.044907      | -770.397176     | 6.03                                      | 0     |
| <b>3</b>  | $C_s$          | -770.4409137 | 0.045017      | -770.395897     | 6.83                                      | 1     |
| <b>4</b>  | $C_s$          | -770.4528250 | 0.049153      | -770.403672     | 1.96                                      | 0     |
| <b>5</b>  | $C_s$          | -770.3971970 | 0.044715      | -770.352482     | 34.08                                     | 0     |
| <b>6</b>  | $C_s$          | -770.4282405 | 0.047652      | -770.380588     | 16.44                                     | 0     |
| <b>7</b>  | $C_s$          | -770.4259617 | 0.045128      | -770.380834     | 16.29                                     | 1     |
| <b>8</b>  | $C_s$          | -770.3967635 | 0.045561      | -770.351202     | 34.88                                     | 0     |
| <b>9</b>  | $C_s$          | -770.4461641 | 0.044684      | -770.401480     | 3.33                                      | 1     |
| <b>10</b> | $C_{2v}$       | -770.4027952 | 0.040792      | -770.362003     | 28.10                                     | 1     |
| <b>11</b> | $C_{2v}$       | -770.4329533 | 0.043536      | -770.389417     | 10.90                                     | 0     |
| <b>12</b> | $C_s$          | -770.4552664 | 0.048479      | -770.406788     | 0.00                                      | 0     |
| <b>13</b> | $C_s$          | -770.4056914 | 0.044241      | -770.361451     | 28.45                                     | 0     |
| <b>14</b> | $C_{2v}$       | -770.3968412 | 0.039765      | -770.357077     | 31.19                                     | 3     |
| <b>15</b> | $C_s$          | -770.4106335 | 0.043386      | -770.367247     | 24.81                                     | 1     |
| <b>16</b> | $C_s$          | -770.4270231 | 0.047675      | -770.379348     | 17.22                                     | 0     |
| <b>17</b> | $C_s$          | -770.3982595 | 0.043319      | -770.354941     | 32.53                                     | 1     |
| <b>18</b> | $C_s$          | -770.4415882 | 0.045810      | -770.395778     | 6.91                                      | 1     |

Table S5: Harmonic vibrational frequencies ( $\text{cm}^{-1}$ ) and IR intensities ( $\text{km mol}^{-1}$ ) of isomer **1** of  $\text{Si}_2\text{C}_5\text{H}_2$  calculated at the fc-CCSD(T)/cc-pVTZ level of theory.

| Mode | symmetry | frequency | intensity |
|------|----------|-----------|-----------|
| 1    | $a_2$    | 191.7     | 0.0       |
| 2    | $b_1$    | 215.1     | 14.8      |
| 3    | $a_1$    | 229.4     | 2.1       |
| 4    | $b_2$    | 420.1     | 104.2     |
| 5    | $b_2$    | 509.6     | 17.6      |
| 6    | $a_2$    | 570.6     | 0.0       |
| 7    | $b_1$    | 600.0     | 0.0       |
| 8    | $a_1$    | 610.4     | 42.5      |
| 9    | $a_1$    | 781.9     | 1.0       |
| 10   | $b_1$    | 825.4     | 20.7      |
| 11   | $b_2$    | 880.6     | 0.2       |
| 12   | $a_2$    | 909.4     | 0.0       |
| 13   | $a_1$    | 984.0     | 28.7      |
| 14   | $b_2$    | 997.4     | 16.5      |
| 15   | $a_1$    | 1099.6    | 2.4       |
| 16   | $b_2$    | 1266.6    | 12.4      |
| 17   | $a_1$    | 1331.9    | 47.8      |
| 18   | $a_1$    | 1454.7    | 4.3       |
| 19   | $b_2$    | 1476.3    | 9.3       |
| 20   | $b_2$    | 3201.7    | 1.9       |
| 21   | $a_1$    | 3221.7    | 21.4      |

Table S6: Harmonic vibrational frequencies ( $\text{cm}^{-1}$ ) and IR intensities ( $\text{km mol}^{-1}$ ) of isomer **2** of  $\text{Si}_2\text{C}_5\text{H}_2$  calculated at the fc-CCSD(T)/cc-pVTZ level of theory.

| Mode | symmetry | frequency | intensity |
|------|----------|-----------|-----------|
| 1    | $a''$    | 88.3      | 0.3       |
| 2    | $a'$     | 90.6      | 0.4       |
| 3    | $a''$    | 229.9     | 0.2       |
| 4    | $a'$     | 249.0     | 5.2       |
| 5    | $a'$     | 324.6     | 0.6       |
| 6    | $a''$    | 421.2     | 2.3       |
| 7    | $a'$     | 440.5     | 7.9       |
| 8    | $a''$    | 463.0     | 1.4       |
| 9    | $a'$     | 502.2     | 1.0       |
| 10   | $a''$    | 575.1     | 51.5      |
| 11   | $a'$     | 633.3     | 31.2      |
| 12   | $a'$     | 656.1     | 82.6      |
| 13   | $a'$     | 794.3     | 7.3       |
| 14   | $a''$    | 797.4     | 17.2      |
| 15   | $a'$     | 983.4     | 5.9       |
| 16   | $a'$     | 1188.1    | 1.9       |
| 17   | $a'$     | 1360.8    | 24.1      |
| 18   | $a'$     | 1694.8    | 4.7       |
| 19   | $a'$     | 2141.4    | 0.7       |
| 20   | $a'$     | 3159.9    | 3.2       |
| 21   | $a'$     | 3461.4    | 84.1      |

Table S7: Harmonic vibrational frequencies ( $\text{cm}^{-1}$ ) and IR intensities ( $\text{km mol}^{-1}$ ) of isomer **3** of  $\text{Si}_2\text{C}_5\text{H}_2$  calculated at the fc-CCSD(T)/cc-pVTZ level of theory.

| Mode | symmetry | frequency | intensity |
|------|----------|-----------|-----------|
| 1    | $a'$     | 87.7      | 0.7       |
| 2    | $a''$    | 119.5     | 1.6       |
| 3    | $a''$    | 186.6     | 1.0       |
| 4    | $a'$     | 246.3     | 0.2       |
| 5    | $a'$     | 324.1     | 0.7       |
| 6    | $a''$    | 389.4     | 3.1       |
| 7    | $a'$     | 390.2     | 11.1      |
| 8    | $a''$    | 518.4     | 2.9       |
| 9    | $a''$    | 580.3     | 45.6      |
| 10   | $a'$     | 581.3     | 52.4      |
| 11   | $a'$     | 630.3     | 25.5      |
| 12   | $a'$     | 702.8     | 5.5       |
| 13   | $a'$     | 725.3     | 31.4      |
| 14   | $a''$    | 790.3     | 9.9       |
| 15   | $a'$     | 995.4     | 11.2      |
| 16   | $a'$     | 1192.4    | 20.4      |
| 17   | $a'$     | 1368.3    | 8.5       |
| 18   | $a'$     | 1689.0    | 3.0       |
| 19   | $a'$     | 2138.8    | 0.6       |
| 20   | $a'$     | 3186.0    | 2.3       |
| 21   | $a'$     | 3461.1    | 79.0      |

Table S8: Harmonic vibrational frequencies ( $\text{cm}^{-1}$ ) and IR intensities ( $\text{km mol}^{-1}$ ) of isomer 4 of  $\text{Si}_2\text{C}_5\text{H}_2$  calculated at the fc-CCSD(T)/cc-pVTZ level of theory.

| Mode | symmetry | frequency | intensity |
|------|----------|-----------|-----------|
| 1    | $a''$    | 138.7     | 2.7       |
| 2    | $a'$     | 262.9     | 12.3      |
| 3    | $a''$    | 280.2     | 0.0       |
| 4    | $a'$     | 383.7     | 1.5       |
| 5    | $a''$    | 408.7     | 0.8       |
| 6    | $a'$     | 465.6     | 7.0       |
| 7    | $a''$    | 526.8     | 8.3       |
| 8    | $a'$     | 549.4     | 39.6      |
| 9    | $a'$     | 610.0     | 2.7       |
| 10   | $a'$     | 715.2     | 60.9      |
| 11   | $a''$    | 790.5     | 17.9      |
| 12   | $a'$     | 813.6     | 0.9       |
| 13   | $a'$     | 891.1     | 9.3       |
| 14   | $a''$    | 942.9     | 0.8       |
| 15   | $a'$     | 1150.4    | 2.2       |
| 16   | $a'$     | 1267.9    | 74.7      |
| 17   | $a'$     | 1365.4    | 15.3      |
| 18   | $a'$     | 1489.0    | 73.2      |
| 19   | $a'$     | 1701.0    | 5.3       |
| 20   | $a'$     | 3092.9    | 11.0      |
| 21   | $a'$     | 3153.1    | 7.9       |

Table S9: Harmonic vibrational frequencies ( $\text{cm}^{-1}$ ) and IR intensities ( $\text{km mol}^{-1}$ ) of isomer **5** of  $\text{Si}_2\text{C}_5\text{H}_2$  calculated at the fc-CCSD(T)/cc-pVTZ level of theory.

| Mode | symmetry | frequency | intensity |
|------|----------|-----------|-----------|
| 1    | $a''$    | 146.1     | 2.0       |
| 2    | $a''$    | 284.6     | 4.4       |
| 3    | $a'$     | 309.4     | 14.6      |
| 4    | $a'$     | 366.2     | 9.5       |
| 5    | $a''$    | 454.0     | 3.8       |
| 6    | $a''$    | 486.8     | 14.2      |
| 7    | $a'$     | 494.2     | 33.5      |
| 8    | $a''$    | 603.8     | 0.0       |
| 9    | $a'$     | 613.4     | 10.5      |
| 10   | $a'$     | 715.0     | 37.4      |
| 11   | $a''$    | 765.5     | 19.3      |
| 12   | $a'$     | 771.4     | 51.0      |
| 13   | $a'$     | 821.2     | 8.6       |
| 14   | $a'$     | 862.7     | 15.2      |
| 15   | $a'$     | 958.1     | 19.8      |
| 16   | $a'$     | 1200.8    | 2.1       |
| 17   | $a'$     | 1309.0    | 47.0      |
| 18   | $a'$     | 1387.5    | 70.0      |
| 19   | $a'$     | 1868.7    | 278.6     |
| 20   | $a'$     | 2275.8    | 112.0     |
| 21   | $a'$     | 3187.9    | 0.8       |

Table S10: Harmonic vibrational frequencies ( $\text{cm}^{-1}$ ) and IR intensities ( $\text{km mol}^{-1}$ ) of isomer **6** of  $\text{Si}_2\text{C}_5\text{H}_2$  calculated at the fc-CCSD(T)/cc-pVTZ level of theory.

| Mode | symmetry | frequency | intensity |
|------|----------|-----------|-----------|
| 1    | $a''$    | 118.2     | 0.2       |
| 2    | $a''$    | 213.7     | 1.6       |
| 3    | $a'$     | 221.4     | 14.0      |
| 4    | $a'$     | 274.3     | 18.8      |
| 5    | $a'$     | 336.2     | 13.2      |
| 6    | $a''$    | 362.6     | 11.2      |
| 7    | $a'$     | 539.4     | 4.5       |
| 8    | $a''$    | 561.8     | 1.5       |
| 9    | $a'$     | 632.6     | 2.4       |
| 10   | $a'$     | 662.4     | 41.9      |
| 11   | $a''$    | 788.2     | 24.8      |
| 12   | $a'$     | 807.7     | 6.1       |
| 13   | $a''$    | 934.0     | 0.5       |
| 14   | $a'$     | 967.5     | 0.3       |
| 15   | $a'$     | 1127.4    | 0.7       |
| 16   | $a'$     | 1273.2    | 24.9      |
| 17   | $a'$     | 1404.9    | 20.7      |
| 18   | $a'$     | 1513.6    | 3.8       |
| 19   | $a'$     | 1847.3    | 4.7       |
| 20   | $a'$     | 3153.1    | 29.7      |
| 21   | $a'$     | 3210.6    | 3.7       |



Table S11: Harmonic vibrational frequencies ( $\text{cm}^{-1}$ ) and IR intensities ( $\text{km mol}^{-1}$ ) of isomer **7** of  $\text{Si}_2\text{C}_5\text{H}_2$  calculated at the fc-CCSD(T)/cc-pVTZ level of theory.

| Mode | symmetry | frequency | intensity |
|------|----------|-----------|-----------|
| 1    | $a''$    | 138.6     | 1.3       |
| 2    | $a'$     | 236.6     | 21.6      |
| 3    | $a''$    | 253.7     | 1.5       |
| 4    | $a'$     | 352.7     | 6.9       |
| 5    | $a''$    | 427.9     | 1.0       |
| 6    | $a'$     | 477.4     | 15.2      |
| 7    | $a'$     | 497.6     | 12.5      |
| 8    | $a''$    | 530.9     | 0.2       |
| 9    | $a'$     | 640.7     | 21.5      |
| 10   | $a''$    | 662.4     | 14.9      |
| 11   | $a'$     | 696.1     | 4.9       |
| 12   | $a'$     | 722.5     | 31.8      |
| 13   | $a''$    | 791.3     | 28.9      |
| 14   | $a'$     | 877.2     | 13.0      |
| 15   | $a'$     | 967.5     | 170.8     |
| 16   | $a'$     | 1191.2    | 11.1      |
| 17   | $a'$     | 1316.3    | 23.0      |
| 18   | $a'$     | 1420.1    | 35.4      |
| 19   | $a'$     | 1824.1    | 461.2     |
| 20   | $a'$     | 3102.9    | 3.4       |
| 21   | $a'$     | 3257.2    | 25.9      |

Table S12: Harmonic vibrational frequencies ( $\text{cm}^{-1}$ ) and IR intensities ( $\text{km mol}^{-1}$ ) of isomer **8** of  $\text{Si}_2\text{C}_5\text{H}_2$  calculated at the fc-CCSD(T)/cc-pVTZ level of theory.

| Mode | symmetry | frequency | intensity |
|------|----------|-----------|-----------|
| 1    | $a''$    | 149.5     | 0.0       |
| 2    | $a''$    | 268.4     | 18.9      |
| 3    | $a'$     | 306.0     | 5.9       |
| 4    | $a'$     | 316.1     | 24.7      |
| 5    | $a''$    | 405.2     | 2.7       |
| 6    | $a''$    | 489.1     | 0.2       |
| 7    | $a'$     | 500.3     | 6.5       |
| 8    | $a'$     | 512.2     | 25.0      |
| 9    | $a''$    | 606.0     | 0.3       |
| 10   | $a''$    | 746.9     | 25.1      |
| 11   | $a'$     | 757.8     | 25.0      |
| 12   | $a'$     | 794.0     | 18.8      |
| 13   | $a'$     | 860.2     | 42.6      |
| 14   | $a'$     | 950.5     | 127.6     |
| 15   | $a'$     | 1103.4    | 3.8       |
| 16   | $a'$     | 1138.6    | 29.4      |
| 17   | $a'$     | 1320.7    | 6.2       |
| 18   | $a'$     | 1375.6    | 36.4      |
| 19   | $a'$     | 1876.7    | 77.3      |
| 20   | $a'$     | 2291.2    | 81.4      |
| 21   | $a'$     | 3242.1    | 0.4       |

Table S13: Harmonic vibrational frequencies ( $\text{cm}^{-1}$ ) and IR intensities ( $\text{km mol}^{-1}$ ) of isomer **9** of  $\text{Si}_2\text{C}_5\text{H}_2$  calculated at the fc-CCSD(T)/cc-pVTZ level of theory.

| Mode | symmetry | frequency | intensity |
|------|----------|-----------|-----------|
| 1    | $a'$     | 85.7      | 1.6       |
| 2    | $a''$    | 91.9      | 1.8       |
| 3    | $a''$    | 225.1     | 0.1       |
| 4    | $a'$     | 257.0     | 2.3       |
| 5    | $a'$     | 308.4     | 5.4       |
| 6    | $a'$     | 364.5     | 3.0       |
| 7    | $a''$    | 400.9     | 1.1       |
| 8    | $a'$     | 439.2     | 6.7       |
| 9    | $a''$    | 480.6     | 0.7       |
| 10   | $a''$    | 509.0     | 1.4       |
| 11   | $a'$     | 569.9     | 20.7      |
| 12   | $a'$     | 691.0     | 45.1      |
| 13   | $a''$    | 834.5     | 46.7      |
| 14   | $a'$     | 932.2     | 4.7       |
| 15   | $a'$     | 1022.8    | 0.4       |
| 16   | $a'$     | 1307.6    | 6.4       |
| 17   | $a'$     | 1470.6    | 0.2       |
| 18   | $a'$     | 1727.0    | 4.4       |
| 19   | $a'$     | 2088.4    | 6.4       |
| 20   | $a'$     | 3135.0    | 1.9       |
| 21   | $a'$     | 3221.2    | 1.1       |

Table S14: Harmonic vibrational frequencies ( $\text{cm}^{-1}$ ) and IR intensities ( $\text{km mol}^{-1}$ ) of isomer **10** of  $\text{Si}_2\text{C}_5\text{H}_2$  calculated at the fc-CCSD(T)/cc-pVTZ level of theory.

| Mode | symmetry | frequency | intensity |
|------|----------|-----------|-----------|
| 1    | $b_2$    | 71.5      | 1.2       |
| 2    | $b_1$    | 92.7      | 2.4       |
| 3    | $b_2$    | 188.4     | 2.1       |
| 4    | $b_1$    | 246.5     | 0.1       |
| 5    | $a_1$    | 351.0     | 0.0       |
| 6    | $b_2$    | 431.5     | 0.5       |
| 7    | $b_1$    | 432.8     | 2.5       |
| 8    | $b_2$    | 481.8     | 0.1       |
| 9    | $a_1$    | 487.7     | 2.2       |
| 10   | $b_1$    | 507.4     | 0.1       |
| 11   | $b_2$    | 591.2     | 44.9      |
| 12   | $b_1$    | 625.8     | 37.7      |
| 13   | $b_1$    | 653.9     | 2.1       |
| 14   | $b_2$    | 786.6     | 14.2      |
| 15   | $a_1$    | 895.7     | 0.1       |
| 16   | $b_2$    | 1287.5    | 283.2     |
| 17   | $a_1$    | 1340.0    | 5.1       |
| 18   | $a_1$    | 1562.4    | 8.0       |
| 19   | $a_1$    | 2096.0    | 0.4       |
| 20   | $a_1$    | 2238.0    | 33.6      |
| 21   | $a_1$    | 3457.9    | 119.6     |

Table S15: Harmonic vibrational frequencies ( $\text{cm}^{-1}$ ) and IR intensities ( $\text{km mol}^{-1}$ ) of isomer **11** of  $\text{Si}_2\text{C}_5\text{H}_2$  calculated at the fc-CCSD(T)/cc-pVTZ level of theory.

| Mode | symmetry | frequency | intensity |
|------|----------|-----------|-----------|
| 1    | $b_1$    | 60.4      | 1.0       |
| 2    | $b_2$    | 73.5      | 2.1       |
| 3    | $b_1$    | 148.6     | 2.7       |
| 4    | $b_2$    | 250.3     | 6.4       |
| 5    | $a_1$    | 321.5     | 23.5      |
| 6    | $b_1$    | 321.7     | 0.7       |
| 7    | $b_2$    | 333.8     | 2.9       |
| 8    | $a_1$    | 398.1     | 0.0       |
| 9    | $b_2$    | 502.9     | 0.2       |
| 10   | $b_1$    | 515.1     | 1.2       |
| 11   | $b_2$    | 595.6     | 40.3      |
| 12   | $b_1$    | 625.1     | 42.2      |
| 13   | $b_1$    | 744.3     | 20.2      |
| 14   | $b_2$    | 792.4     | 0.5       |
| 15   | $a_1$    | 868.7     | 18.0      |
| 16   | $b_2$    | 906.7     | 135.1     |
| 17   | $a_1$    | 966.6     | 10.9      |
| 18   | $a_1$    | 1964.0    | 8.9       |
| 19   | $a_1$    | 2136.2    | 2.5       |
| 20   | $a_1$    | 3254.7    | 0.9       |
| 21   | $a_1$    | 3451.0    | 136.7     |

Table S16: Harmonic vibrational frequencies ( $\text{cm}^{-1}$ ) and IR intensities ( $\text{km mol}^{-1}$ ) of isomer **12** of  $\text{Si}_2\text{C}_5\text{H}_2$  calculated at the fc-CCSD(T)/cc-pVTZ level of theory.

| Mode | symmetry | frequency | intensity |
|------|----------|-----------|-----------|
| 1    | $a''$    | 113.9     | 0.2       |
| 2    | $a''$    | 182.6     | 4.3       |
| 3    | $a'$     | 276.0     | 0.9       |
| 4    | $a'$     | 287.0     | 11.8      |
| 5    | $a''$    | 300.0     | 6.2       |
| 6    | $a'$     | 411.4     | 15.9      |
| 7    | $a''$    | 422.0     | 0.3       |
| 8    | $a'$     | 474.1     | 15.6      |
| 9    | $a'$     | 527.3     | 26.7      |
| 10   | $a''$    | 594.8     | 10.6      |
| 11   | $a''$    | 687.6     | 51.9      |
| 12   | $a'$     | 783.7     | 24.4      |
| 13   | $a'$     | 871.3     | 38.4      |
| 14   | $a'$     | 892.9     | 95.5      |
| 15   | $a'$     | 1060.6    | 1.4       |
| 16   | $a'$     | 1151.1    | 28.1      |
| 17   | $a'$     | 1322.4    | 26.5      |
| 18   | $a'$     | 1404.2    | 35.8      |
| 19   | $a'$     | 1814.6    | 101.8     |
| 20   | $a'$     | 3224.5    | 3.3       |
| 21   | $a'$     | 3329.1    | 83.3      |

Table S17: Harmonic vibrational frequencies ( $\text{cm}^{-1}$ ) and IR intensities ( $\text{km mol}^{-1}$ ) of isomer **13** of  $\text{Si}_2\text{C}_5\text{H}_2$  calculated at the fc-CCSD(T)/cc-pVTZ level of theory.

| Mode | symmetry | frequency | intensity |
|------|----------|-----------|-----------|
| 1    | $a''$    | 143.5     | 4.7       |
| 2    | $a''$    | 244.7     | 0.9       |
| 3    | $a'$     | 261.5     | 6.9       |
| 4    | $a'$     | 299.6     | 11.4      |
| 5    | $a''$    | 345.9     | 2.2       |
| 6    | $a'$     | 360.5     | 32.0      |
| 7    | $a''$    | 476.0     | 8.5       |
| 8    | $a'$     | 485.2     | 50.5      |
| 9    | $a''$    | 512.5     | 0.0       |
| 10   | $a'$     | 517.1     | 5.9       |
| 11   | $a'$     | 627.1     | 78.5      |
| 12   | $a''$    | 691.2     | 23.1      |
| 13   | $a'$     | 745.7     | 27.8      |
| 14   | $a'$     | 813.6     | 33.4      |
| 15   | $a'$     | 880.4     | 13.7      |
| 16   | $a'$     | 1115.9    | 22.4      |
| 17   | $a'$     | 1244.1    | 32.8      |
| 18   | $a'$     | 1906.7    | 78.0      |
| 19   | $a'$     | 1992.7    | 274.4     |
| 20   | $a'$     | 2297.9    | 85.4      |
| 21   | $a'$     | 3187.1    | 1.3       |

Table S18: Harmonic vibrational frequencies ( $\text{cm}^{-1}$ ) and IR intensities ( $\text{km mol}^{-1}$ ) of isomer **14** of  $\text{Si}_2\text{C}_5\text{H}_2$  calculated at the fc-CCSD(T)/cc-pVTZ level of theory.

| Mode | symmetry | frequency | intensity |
|------|----------|-----------|-----------|
| 1    | $b_1$    | 36.6      | 1.0       |
| 2    | $b_2$    | 107.8     | 0.2       |
| 3    | $b_1$    | 163.8     | 2.4       |
| 4    | $b_2$    | 221.9     | 6.2       |
| 5    | $b_2$    | 311.0     | 42.7      |
| 6    | $b_1$    | 312.2     | 7.5       |
| 7    | $a_1$    | 339.0     | 5.0       |
| 8    | $a_1$    | 438.3     | 28.1      |
| 9    | $b_2$    | 451.3     | 0.2       |
| 10   | $b_1$    | 481.9     | 0.3       |
| 11   | $b_2$    | 542.3     | 59.3      |
| 12   | $a_1$    | 555.6     | 11.3      |
| 13   | $b_1$    | 598.6     | 39.6      |
| 14   | $b_2$    | 607.2     | 18.9      |
| 15   | $b_1$    | 660.2     | 32.2      |
| 16   | $b_2$    | 887.0     | 110.2     |
| 17   | $a_1$    | 1239.8    | 0.4       |
| 18   | $a_1$    | 1901.8    | 6.7       |
| 19   | $a_1$    | 2121.3    | 24.3      |
| 20   | $a_1$    | 3424.1    | 97.1      |
| 21   | $a_1$    | 3462.5    | 94.1      |



Table S19: Harmonic vibrational frequencies ( $\text{cm}^{-1}$ ) and IR intensities ( $\text{km mol}^{-1}$ ) of isomer **15** of  $\text{Si}_2\text{C}_5\text{H}_2$  calculated at the fc-CCSD(T)/cc-pVTZ level of theory.

| Mode | symmetry | frequency | intensity |
|------|----------|-----------|-----------|
| 1    | $a'$     | 89.4      | 0.2       |
| 2    | $a''$    | 89.8      | 0.1       |
| 3    | $a''$    | 161.5     | 3.0       |
| 4    | $a'$     | 191.6     | 0.7       |
| 5    | $a'$     | 294.9     | 25.7      |
| 6    | $a''$    | 391.0     | 1.4       |
| 7    | $a'$     | 403.3     | 1.5       |
| 8    | $a''$    | 526.1     | 0.3       |
| 9    | $a'$     | 552.3     | 9.3       |
| 10   | $a'$     | 594.2     | 51.0      |
| 11   | $a''$    | 600.8     | 45.7      |
| 12   | $a'$     | 685.8     | 15.7      |
| 13   | $a''$    | 730.3     | 35.1      |
| 14   | $a'$     | 838.4     | 30.1      |
| 15   | $a'$     | 928.8     | 9.6       |
| 16   | $a'$     | 1058.1    | 62.7      |
| 17   | $a'$     | 1250.7    | 27.8      |
| 18   | $a'$     | 1511.8    | 195.7     |
| 19   | $a'$     | 2143.0    | 23.8      |
| 20   | $a'$     | 3232.3    | 0.3       |
| 21   | $a'$     | 3458.7    | 92.6      |

Table S20: Harmonic vibrational frequencies ( $\text{cm}^{-1}$ ) and IR intensities ( $\text{km mol}^{-1}$ ) of isomer **16** of  $\text{Si}_2\text{C}_5\text{H}_2$  calculated at the fc-CCSD(T)/cc-pVTZ level of theory.

| Mode | symmetry | frequency | intensity |
|------|----------|-----------|-----------|
| 1    | $a''$    | 117.1     | 0.6       |
| 2    | $a'$     | 221.3     | 21.0      |
| 3    | $a''$    | 288.1     | 0.1       |
| 4    | $a'$     | 351.8     | 15.5      |
| 5    | $a''$    | 378.0     | 0.8       |
| 6    | $a'$     | 452.2     | 73.6      |
| 7    | $a'$     | 481.3     | 54.6      |
| 8    | $a''$    | 506.7     | 8.6       |
| 9    | $a'$     | 580.7     | 24.4      |
| 10   | $a'$     | 647.2     | 62.0      |
| 11   | $a'$     | 742.9     | 7.5       |
| 12   | $a''$    | 772.6     | 25.4      |
| 13   | $a''$    | 970.3     | 0.7       |
| 14   | $a'$     | 1051.6    | 15.5      |
| 15   | $a'$     | 1159.6    | 17.8      |
| 16   | $a'$     | 1327.2    | 12.9      |
| 17   | $a'$     | 1382.4    | 0.8       |
| 18   | $a'$     | 1442.6    | 28.4      |
| 19   | $a'$     | 1846.6    | 201.1     |
| 20   | $a'$     | 3134.3    | 9.2       |
| 21   | $a'$     | 3156.5    | 26.6      |

Table S21: Harmonic vibrational frequencies ( $\text{cm}^{-1}$ ) and IR intensities ( $\text{km mol}^{-1}$ ) of isomer **17** of  $\text{Si}_2\text{C}_5\text{H}_2$  calculated at the fc-CCSD(T)/cc-pVTZ level of theory.

| Mode | symmetry | frequency | intensity |
|------|----------|-----------|-----------|
| 1    | $a''$    | 163.9     | 5.6       |
| 2    | $a''$    | 215.8     | 3.2       |
| 3    | $a'$     | 225.1     | 2.1       |
| 4    | $a'$     | 299.5     | 28.7      |
| 5    | $a''$    | 332.8     | 2.7       |
| 6    | $a'$     | 406.1     | 23.2      |
| 7    | $a''$    | 452.6     | 13.4      |
| 8    | $a'$     | 479.9     | 10.1      |
| 9    | $a''$    | 550.4     | 0.7       |
| 10   | $a'$     | 562.0     | 25.5      |
| 11   | $a'$     | 675.6     | 43.1      |
| 12   | $a''$    | 684.6     | 15.4      |
| 13   | $a'$     | 802.5     | 9.5       |
| 14   | $a'$     | 825.9     | 17.2      |
| 15   | $a'$     | 875.5     | 42.8      |
| 16   | $a'$     | 1104.3    | 44.4      |
| 17   | $a'$     | 1253.1    | 78.5      |
| 18   | $a'$     | 1894.8    | 462.8     |
| 19   | $a'$     | 1940.5    | 77.5      |
| 20   | $a'$     | 2326.5    | 58.1      |
| 21   | $a'$     | 3164.1    | 3.6       |

Table S22: Harmonic vibrational frequencies ( $\text{cm}^{-1}$ ) and IR intensities ( $\text{km mol}^{-1}$ ) of isomer **18** of  $\text{Si}_2\text{C}_5\text{H}_2$  calculated at the fc-CCSD(T)/cc-pVTZ level of theory.

| Mode | symmetry | frequency | intensity |
|------|----------|-----------|-----------|
| 1    | $a'$     | 47.5      | 0.5       |
| 2    | $a''$    | 72.6      | 1.4       |
| 3    | $a'$     | 138.7     | 2.3       |
| 4    | $a''$    | 175.9     | 5.1       |
| 5    | $a'$     | 311.8     | 4.0       |
| 6    | $a''$    | 340.0     | 14.9      |
| 7    | $a'$     | 456.0     | 1.3       |
| 8    | $a''$    | 497.6     | 2.7       |
| 9    | $a'$     | 623.0     | 3.9       |
| 10   | $a'$     | 705.2     | 7.6       |
| 11   | $a''$    | 706.4     | 4.9       |
| 12   | $a'$     | 751.1     | 41.1      |
| 13   | $a''$    | 853.2     | 33.6      |
| 14   | $a'$     | 988.7     | 22.5      |
| 15   | $a'$     | 1133.7    | 84.0      |
| 16   | $a'$     | 1221.5    | 20.4      |
| 17   | $a'$     | 1397.3    | 30.5      |
| 18   | $a'$     | 1558.1    | 186.5     |
| 19   | $a'$     | 1960.5    | 412.5     |
| 20   | $a'$     | 3141.6    | 8.2       |
| 21   | $a'$     | 3184.4    | 8.3       |

Table S23: A-reduced Centrifugal Distortion Parameters ( $\perp$  representation; in MHz) of  $\text{Si}_2\text{C}_5\text{H}_2$  Isomers Calculated at the fc-CCSD(T)/cc-pVTZ Level of Theory.

| Isomer               | $\Delta_J$              | $\Delta_K$              | $\Delta_{JK}$            | $\delta_J$              | $\delta_K$              |
|----------------------|-------------------------|-------------------------|--------------------------|-------------------------|-------------------------|
| <b>1</b>             | $0.3137 \times 10^{-3}$ | $0.8557 \times 10^{-3}$ | $-0.8079 \times 10^{-3}$ | $0.1375 \times 10^{-3}$ | $0.6925 \times 10^{-4}$ |
| <b>1<sup>a</sup></b> | $0.3175 \times 10^{-3}$ | $0.8546 \times 10^{-3}$ | $-0.8098 \times 10^{-3}$ | $0.1391 \times 10^{-3}$ | $0.7092 \times 10^{-4}$ |
| <b>2</b>             | $0.7591 \times 10^{-4}$ | $0.1109 \times 10^{-1}$ | $-0.4504 \times 10^{-3}$ | $0.1204 \times 10^{-4}$ | $0.4233 \times 10^{-3}$ |
| <b>3</b>             | $0.1489 \times 10^{-3}$ | $0.1275 \times 10^{-1}$ | $-0.1834 \times 10^{-2}$ | $0.4431 \times 10^{-4}$ | $0.4224 \times 10^{-3}$ |
| <b>4</b>             | $0.3831 \times 10^{-4}$ | $0.1584 \times 10^{-2}$ | $0.2652 \times 10^{-3}$  | $0.8572 \times 10^{-5}$ | $0.2391 \times 10^{-3}$ |
| <b>5</b>             | $0.4867 \times 10^{-4}$ | $0.1391 \times 10^{-2}$ | $0.1694 \times 10^{-3}$  | $0.1174 \times 10^{-4}$ | $0.2375 \times 10^{-3}$ |
| <b>6</b>             | $0.1289 \times 10^{-3}$ | $0.4401 \times 10^{-3}$ | $0.3848 \times 10^{-3}$  | $0.4368 \times 10^{-4}$ | $0.4021 \times 10^{-3}$ |
| <b>7</b>             | $0.4320 \times 10^{-4}$ | $0.2064 \times 10^{-2}$ | $0.3080 \times 10^{-3}$  | $0.1045 \times 10^{-4}$ | $0.2881 \times 10^{-3}$ |
| <b>8</b>             | $0.8094 \times 10^{-4}$ | $0.1356 \times 10^{-2}$ | $0.1131 \times 10^{-4}$  | $0.2763 \times 10^{-4}$ | $0.1999 \times 10^{-3}$ |
| <b>9</b>             | $0.1109 \times 10^{-4}$ | $0.2980 \times 10^{-1}$ | $0.1201 \times 10^{-2}$  | $0.1072 \times 10^{-5}$ | $0.6325 \times 10^{-3}$ |
| <b>10</b>            | $0.9392 \times 10^{-5}$ | $0.1219 \times 10^{-2}$ | $0.2343 \times 10^{-2}$  | $0.1281 \times 10^{-5}$ | $0.1213 \times 10^{-2}$ |
| <b>11</b>            | $0.2397 \times 10^{-4}$ | $0.1117 \times 10^{-2}$ | $0.2475 \times 10^{-2}$  | $0.3606 \times 10^{-5}$ | $0.1275 \times 10^{-2}$ |
| <b>12</b>            | $0.8925 \times 10^{-4}$ | $0.2015 \times 10^{-2}$ | $-0.8771 \times 10^{-4}$ | $0.3094 \times 10^{-4}$ | $0.1963 \times 10^{-3}$ |
| <b>13</b>            | $0.7496 \times 10^{-4}$ | $0.1427 \times 10^{-2}$ | $0.1888 \times 10^{-3}$  | $0.2463 \times 10^{-4}$ | $0.3245 \times 10^{-3}$ |
| <b>14</b>            | $0.3271 \times 10^{-4}$ | $0.2534 \times 10^{-2}$ | $0.1007 \times 10^{-2}$  | $0.7211 \times 10^{-5}$ | $0.6182 \times 10^{-3}$ |
| <b>15</b>            | $0.1350 \times 10^{-3}$ | $0.8027 \times 10^{-2}$ | $-0.7320 \times 10^{-3}$ | $0.5031 \times 10^{-4}$ | $0.4000 \times 10^{-3}$ |
| <b>16</b>            | $0.5725 \times 10^{-4}$ | $0.2745 \times 10^{-2}$ | $0.3126 \times 10^{-3}$  | $0.1407 \times 10^{-4}$ | $0.2489 \times 10^{-3}$ |
| <b>17</b>            | $0.9314 \times 10^{-4}$ | $0.9847 \times 10^{-3}$ | $0.4422 \times 10^{-3}$  | $0.3186 \times 10^{-4}$ | $0.4942 \times 10^{-3}$ |
| <b>18</b>            | $0.1886 \times 10^{-3}$ | $0.7346 \times 10^{-1}$ | $-0.5815 \times 10^{-2}$ | $0.4059 \times 10^{-4}$ | $0.1030 \times 10^{-2}$ |

<sup>a</sup> Calculated at the ae-CCSD(T)/cc-pwCVTZ level of theory.

Table S24: S-reduced Centrifugal Distortion Parameters ( $\perp$  representation; in MHz) of  $\text{Si}_2\text{C}_5\text{H}_2$  Isomers Calculated at the fc-CCSD(T)/cc-pVTZ Level of Theory.

| Isomer               | $D_J$                   | $D_K$                   | $D_{JK}$                 | $D_1$                    | $D_2$                    |
|----------------------|-------------------------|-------------------------|--------------------------|--------------------------|--------------------------|
| <b>1</b>             | $0.2976 \times 10^{-3}$ | $0.7752 \times 10^{-3}$ | $-0.7112 \times 10^{-3}$ | $-0.1375 \times 10^{-3}$ | $-0.8054 \times 10^{-5}$ |
| <b>1<sup>a</sup></b> | $0.3008 \times 10^{-3}$ | $0.7713 \times 10^{-3}$ | $-0.7098 \times 10^{-3}$ | $-0.1391 \times 10^{-3}$ | $-0.8331 \times 10^{-5}$ |
| <b>2</b>             | $0.7412 \times 10^{-4}$ | $0.1109 \times 10^{-1}$ | $-0.4397 \times 10^{-3}$ | $-0.1204 \times 10^{-4}$ | $-0.8940 \times 10^{-6}$ |
| <b>3</b>             | $0.1437 \times 10^{-3}$ | $0.1272 \times 10^{-1}$ | $-0.1803 \times 10^{-2}$ | $-0.4431 \times 10^{-4}$ | $-0.2598 \times 10^{-5}$ |
| <b>4</b>             | $0.3430 \times 10^{-4}$ | $0.1564 \times 10^{-2}$ | $0.2893 \times 10^{-3}$  | $-0.8572 \times 10^{-5}$ | $-0.2006 \times 10^{-5}$ |
| <b>5</b>             | $0.4429 \times 10^{-4}$ | $0.1370 \times 10^{-2}$ | $0.1957 \times 10^{-3}$  | $-0.1174 \times 10^{-4}$ | $-0.2190 \times 10^{-5}$ |
| <b>6</b>             | $0.9786 \times 10^{-4}$ | $0.2850 \times 10^{-3}$ | $0.5709 \times 10^{-3}$  | $-0.4368 \times 10^{-4}$ | $-0.1552 \times 10^{-4}$ |
| <b>7</b>             | $0.3781 \times 10^{-4}$ | $0.2038 \times 10^{-2}$ | $0.3403 \times 10^{-3}$  | $-0.1045 \times 10^{-4}$ | $-0.2694 \times 10^{-5}$ |
| <b>8</b>             | $0.7011 \times 10^{-4}$ | $0.1302 \times 10^{-2}$ | $0.7628 \times 10^{-4}$  | $-0.2763 \times 10^{-4}$ | $-0.5414 \times 10^{-5}$ |
| <b>9</b>             | $0.9438 \times 10^{-5}$ | $0.2980 \times 10^{-1}$ | $0.1211 \times 10^{-2}$  | $-0.1072 \times 10^{-5}$ | $-0.8261 \times 10^{-6}$ |
| <b>10</b>            | $0.3860 \times 10^{-5}$ | $0.1191 \times 10^{-2}$ | $0.2376 \times 10^{-2}$  | $-0.1281 \times 10^{-5}$ | $-0.2766 \times 10^{-5}$ |
| <b>11</b>            | $0.1328 \times 10^{-4}$ | $0.1063 \times 10^{-2}$ | $0.2540 \times 10^{-2}$  | $-0.3606 \times 10^{-5}$ | $-0.5347 \times 10^{-5}$ |
| <b>12</b>            | $0.7933 \times 10^{-4}$ | $0.1965 \times 10^{-2}$ | $-0.2819 \times 10^{-4}$ | $-0.3094 \times 10^{-4}$ | $-0.4960 \times 10^{-5}$ |
| <b>13</b>            | $0.6232 \times 10^{-4}$ | $0.1364 \times 10^{-2}$ | $0.2647 \times 10^{-3}$  | $-0.2463 \times 10^{-4}$ | $-0.6321 \times 10^{-5}$ |
| <b>14</b>            | $0.2404 \times 10^{-4}$ | $0.2491 \times 10^{-2}$ | $0.1059 \times 10^{-2}$  | $-0.7211 \times 10^{-5}$ | $-0.4335 \times 10^{-5}$ |
| <b>15</b>            | $0.1235 \times 10^{-3}$ | $0.7969 \times 10^{-2}$ | $-0.6628 \times 10^{-3}$ | $-0.5031 \times 10^{-4}$ | $-0.5759 \times 10^{-5}$ |
| <b>16</b>            | $0.4993 \times 10^{-4}$ | $0.2709 \times 10^{-2}$ | $0.3566 \times 10^{-3}$  | $-0.1407 \times 10^{-4}$ | $-0.3662 \times 10^{-5}$ |
| <b>17</b>            | $0.7093 \times 10^{-4}$ | $0.8736 \times 10^{-3}$ | $0.5755 \times 10^{-3}$  | $-0.3186 \times 10^{-4}$ | $-0.1111 \times 10^{-4}$ |
| <b>18</b>            | $0.1849 \times 10^{-3}$ | $0.7344 \times 10^{-1}$ | $-0.5793 \times 10^{-2}$ | $-0.4059 \times 10^{-4}$ | $-0.1849 \times 10^{-5}$ |

<sup>a</sup> Calculated at the ae-CCSD(T)/cc-pwCVTZ level of theory.

Table S25: Optimized geometries of the singlet and triplet ground electronic states of isomer **1** ( $C_{2v}$ ) of  $\text{Si}_2\text{C}_5\text{H}_2$  in Cartesian coordinates (in Ångström units) at different levels.

| $\tilde{X}^1A_1$ ; fc-CCSD(T)/cc-pVTZ    |           |           |           | $\tilde{X}^1A_1$ ; ae-CCSD(T)/cc-pwCVTZ   |           |           |           |
|------------------------------------------|-----------|-----------|-----------|-------------------------------------------|-----------|-----------|-----------|
| C                                        | 0.000000  | 0.000000  | 0.343912  | C                                         | 0.000000  | 0.000000  | 0.345282  |
| C                                        | 0.000000  | -1.165613 | -0.565033 | C                                         | 0.000000  | -1.161309 | -0.560329 |
| C                                        | 0.000000  | 1.165613  | -0.565033 | C                                         | 0.000000  | 1.161309  | -0.560329 |
| Si                                       | 0.000000  | -1.774151 | 1.087720  | Si                                        | 0.000000  | -1.760440 | 1.081244  |
| Si                                       | 0.000000  | 1.774151  | 1.087720  | Si                                        | 0.000000  | 1.760440  | 1.081244  |
| C                                        | 0.000000  | -0.693784 | -1.908991 | C                                         | 0.000000  | -0.691618 | -1.900122 |
| C                                        | 0.000000  | 0.693784  | -1.908991 | C                                         | 0.000000  | 0.691618  | -1.900122 |
| H                                        | 0.000000  | -1.329561 | -2.784451 | H                                         | 0.000000  | -1.326630 | -2.774469 |
| H                                        | 0.000000  | 1.329561  | -2.784451 | H                                         | 0.000000  | 1.326630  | -2.774469 |
| $\tilde{X}^1A_1$ ; B3LYP/6-311++G(2d,2p) |           |           |           | $\tilde{X}^3A_2$ ; UB3LYP/6-311++G(2d,2p) |           |           |           |
| C                                        | -0.000000 | 0.000000  | 0.392572  | C                                         | -0.000000 | -0.000000 | 0.439321  |
| C                                        | 0.000000  | 1.156669  | -0.511157 | C                                         | 0.000000  | 1.199222  | -0.552584 |
| C                                        | -0.000000 | -1.156669 | -0.511157 | C                                         | -0.000000 | -1.199222 | -0.552584 |
| Si                                       | 0.000000  | 1.785540  | 1.122541  | Si                                        | 0.000000  | 1.767620  | 1.115511  |
| Si                                       | -0.000000 | -1.785540 | 1.122541  | Si                                        | -0.000000 | -1.767620 | 1.115511  |
| C                                        | 0.000000  | 0.690661  | -1.850277 | C                                         | 0.000000  | 0.716137  | -1.829525 |
| C                                        | -0.000000 | -0.690661 | -1.850277 | C                                         | -0.000000 | -0.716137 | -1.829525 |
| H                                        | 0.000000  | 1.324601  | -2.724685 | H                                         | 0.000000  | 1.326047  | -2.720355 |
| H                                        | -0.000000 | -1.324601 | -2.724685 | H                                         | -0.000000 | -1.326047 | -2.720355 |

Table S26: Optimized geometries of the singlet and triplet ground electronic states of isomer **2** ( $C_s$ ) of  $\text{Si}_2\text{C}_5\text{H}_2$  in Cartesian coordinates (in Ångström units) at different levels.

| $\tilde{X}^1 A'$ ; fc-CCSD(T)/cc-pVTZ |           |           |          |
|---------------------------------------|-----------|-----------|----------|
| Si                                    | 0.691439  | 1.158966  | 0.000000 |
| C                                     | -0.316895 | -0.487673 | 0.000000 |
| C                                     | 1.030031  | -0.785741 | 0.000000 |
| Si                                    | 2.688790  | -0.246784 | 0.000000 |
| C                                     | -1.563408 | -1.011548 | 0.000000 |
| H                                     | -1.687093 | -2.089800 | 0.000000 |
| C                                     | -2.739355 | -0.207591 | 0.000000 |
| C                                     | -3.759169 | 0.454013  | 0.000000 |
| H                                     | -4.646218 | 1.040465  | 0.000000 |

  

| $\tilde{X}^1 A'$ ; B3LYP/6-311++G(2d,2p) |           |           | $\tilde{X}^3 A'$ ; UB3LYP/6-311++G(2d,2p) |    |           |           |           |
|------------------------------------------|-----------|-----------|-------------------------------------------|----|-----------|-----------|-----------|
| Si                                       | -0.059076 | -1.407903 | -0.000000                                 | Si | 0.064264  | -1.523339 | 0.000000  |
| C                                        | 0.000000  | 0.522200  | 0.000000                                  | C  | 0.096033  | 0.294258  | -0.000000 |
| C                                        | -1.298502 | 0.111115  | -0.000000                                 | C  | -1.229855 | 0.029821  | -0.000000 |
| Si                                       | -2.507932 | -1.126585 | -0.000000                                 | Si | -2.788754 | -0.771086 | 0.000000  |
| C                                        | 0.817467  | 1.591817  | 0.000000                                  | C  | 0.851719  | 1.517148  | -0.000000 |
| H                                        | 0.376779  | 2.583437  | 0.000000                                  | H  | 0.313015  | 2.457266  | -0.000000 |
| C                                        | 2.227129  | 1.517307  | 0.000000                                  | C  | 2.226338  | 1.550117  | -0.000000 |
| C                                        | 3.432049  | 1.495888  | 0.000000                                  | C  | 3.443428  | 1.585626  | -0.000000 |
| H                                        | 4.492480  | 1.469432  | 0.000000                                  | H  | 4.504205  | 1.616897  | -0.000000 |



Table S27: Optimized geometries of the singlet and triplet ground electronic states of isomer **3** ( $C_s$ ) of  $\text{Si}_2\text{C}_5\text{H}_2$  in Cartesian coordinates (in Ångström units) at different levels.

| $\tilde{X}^1 A'$ ; fc-CCSD(T)/cc-pVTZ |           |           |          |
|---------------------------------------|-----------|-----------|----------|
| Si                                    | 1.451954  | 1.188180  | 0.000000 |
| C                                     | -0.357869 | 0.525696  | 0.000000 |
| C                                     | 0.515780  | -0.545230 | 0.000000 |
| Si                                    | 2.147121  | -1.156508 | 0.000000 |
| C                                     | -1.663620 | 0.879436  | 0.000000 |
| H                                     | -1.932956 | 1.928289  | 0.000000 |
| C                                     | -2.718514 | -0.080498 | 0.000000 |
| C                                     | -3.632745 | -0.881556 | 0.000000 |
| H                                     | -4.424743 | -1.591158 | 0.000000 |

  

| $\tilde{X}^1 A'$ ; B3LYP/6-311++G(2d,2p) |           |           | $\tilde{X}^3 A'$ ; UB3LYP/6-311++G(2d,2p) |    |           |           |           |
|------------------------------------------|-----------|-----------|-------------------------------------------|----|-----------|-----------|-----------|
| Si                                       | -0.026850 | -0.000000 | 0.006411                                  | Si | -1.954476 | 0.402339  | 0.000000  |
| C                                        | 0.016549  | -0.000000 | 1.931044                                  | C  | -0.159490 | 0.693224  | -0.000000 |
| C                                        | 1.293286  | 0.000000  | 1.449556                                  | C  | -0.239535 | -0.656087 | 0.000000  |
| Si                                       | 2.439634  | 0.000000  | 0.156481                                  | Si | -0.807493 | -2.313970 | 0.000000  |
| C                                        | -0.751818 | -0.000000 | 3.037683                                  | C  | 0.923664  | 1.641385  | -0.000000 |
| H                                        | -1.829096 | -0.000000 | 2.932200                                  | H  | 0.682948  | 2.696442  | -0.000000 |
| C                                        | -0.232708 | -0.000000 | 4.352170                                  | C  | 2.250090  | 1.278002  | -0.000000 |
| C                                        | 0.183957  | -0.000000 | 5.482956                                  | C  | 3.428098  | 0.968624  | -0.000000 |
| H                                        | 0.557705  | -0.000000 | 6.475708                                  | H  | 4.452634  | 0.692189  | -0.000000 |

Table S28: Optimized geometries of the singlet and triplet ground electronic states of isomer 4 ( $C_s$ ) of  $\text{Si}_2\text{C}_5\text{H}_2$  in Cartesian coordinates (in Ångström units) at different levels.

| $\tilde{X}^1A'$ ; fc-CCSD(T)/cc-pVTZ    |           |           |                                         |    |           |           |           |
|-----------------------------------------|-----------|-----------|-----------------------------------------|----|-----------|-----------|-----------|
| C                                       | -0.743469 | 0.860211  | 0.000000                                |    |           |           |           |
| C                                       | -0.947782 | -0.640011 | 0.000000                                |    |           |           |           |
| C                                       | 0.128042  | -1.548469 | 0.000000                                |    |           |           |           |
| C                                       | 1.458712  | -1.178618 | 0.000000                                |    |           |           |           |
| Si                                      | 2.252163  | 0.567258  | 0.000000                                |    |           |           |           |
| C                                       | 0.530523  | 1.069350  | 0.000000                                |    |           |           |           |
| Si                                      | -2.508735 | 0.215107  | 0.000000                                |    |           |           |           |
| H                                       | -0.131110 | -2.604105 | 0.000000                                |    |           |           |           |
| H                                       | 2.180881  | -1.997591 | 0.000000                                |    |           |           |           |
| $\tilde{X}^1A'$ ; B3LYP/6-311++G(2d,2p) |           |           | $\tilde{X}^3A$ ; UB3LYP/6-311++G(2d,2p) |    |           |           |           |
| C                                       | 0.019428  | -0.000000 | 0.014500                                | C  | -1.044434 | 0.125910  | -0.002794 |
| C                                       | 0.002567  | -0.000000 | 1.512543                                | C  | 0.030767  | 1.065273  | 0.000601  |
| C                                       | 1.184959  | -0.000000 | 2.266316                                | C  | 1.395203  | 0.718997  | 0.002361  |
| C                                       | 2.445403  | 0.000000  | 1.725020                                | C  | 1.828732  | -0.591092 | 0.000989  |
| Si                                      | 2.997594  | 0.000000  | -0.111805                               | Si | 0.575783  | -1.922145 | -0.002359 |
| C                                       | 1.234286  | 0.000000  | -0.385972                               | C  | -1.028957 | -1.217283 | -0.005806 |
| Si                                      | -1.650346 | -0.000000 | 0.880961                                | Si | -1.536357 | 1.946380  | -0.000272 |
| H                                       | 1.073693  | -0.000000 | 3.346122                                | H  | 2.137320  | 1.513505  | 0.004682  |
| H                                       | 3.275455  | 0.000000  | 2.429785                                | H  | 2.890797  | -0.800291 | 0.002597  |

Table S29: Optimized geometries of the singlet and triplet ground electronic states of isomer **5** ( $C_s$ ) of  $\text{Si}_2\text{C}_5\text{H}_2$  in Cartesian coordinates (in Ångström units) at different levels.

| $\tilde{X}^1 A'$ ; fc-CCSD(T)/cc-pVTZ    |           |           |                                            |    |           |           |           |
|------------------------------------------|-----------|-----------|--------------------------------------------|----|-----------|-----------|-----------|
| C                                        | -0.860033 | 0.772173  | 0.000000                                   |    |           |           |           |
| C                                        | -0.735059 | -0.672713 | 0.000000                                   |    |           |           |           |
| C                                        | 0.462664  | -1.396431 | 0.000000                                   |    |           |           |           |
| Si                                       | 1.958199  | -0.413567 | 0.000000                                   |    |           |           |           |
| C                                        | 1.652195  | 1.353212  | 0.000000                                   |    |           |           |           |
| C                                        | 0.378683  | 1.335784  | 0.000000                                   |    |           |           |           |
| Si                                       | -2.479346 | -0.058090 | 0.000000                                   |    |           |           |           |
| H                                        | 0.455380  | -2.479903 | 0.000000                                   |    |           |           |           |
| H                                        | 3.313828  | -1.001638 | 0.000000                                   |    |           |           |           |
| $\tilde{X}^1 A'$ ; B3LYP/6-311++G(2d,2p) |           |           | $\tilde{X}^3 A''$ ; UB3LYP/6-311++G(2d,2p) |    |           |           |           |
| C                                        | -0.126697 | -0.000000 | -0.153140                                  | C  | 1.248201  | 0.134149  | -0.000000 |
| C                                        | -0.039075 | -0.000000 | 1.291923                                   | C  | -0.020774 | 0.979818  | -0.000000 |
| C                                        | 1.127923  | 0.000000  | 2.041438                                   | C  | -1.311774 | 0.541160  | 0.000000  |
| Si                                       | 2.649640  | 0.000000  | 1.109155                                   | Si | -1.580908 | -1.245556 | 0.000000  |
| C                                        | 2.371291  | 0.000000  | -0.651895                                  | C  | -0.015277 | -2.028247 | 0.000000  |
| C                                        | 1.110299  | 0.000000  | -0.687382                                  | C  | 0.898019  | -1.138073 | 0.000000  |
| Si                                       | -1.760133 | -0.000000 | 0.632386                                   | Si | 1.557587  | 1.927849  | -0.000000 |
| H                                        | 1.095122  | 0.000000  | 3.122377                                   | H  | -2.113169 | 1.268351  | 0.000000  |
| H                                        | 3.984742  | 0.000000  | 1.733008                                   | H  | -2.896195 | -1.897613 | 0.000000  |

Table S30: Optimized geometries of the singlet and triplet ground electronic states of isomer **6** ( $C_s$ ) of  $\text{Si}_2\text{C}_5\text{H}_2$  in Cartesian coordinates (in Ångström units) at different levels.

| $\tilde{X}^1 A'$ ; fc-CCSD(T)/cc-pVTZ    |           |           |                                           |    |           |           |           |
|------------------------------------------|-----------|-----------|-------------------------------------------|----|-----------|-----------|-----------|
| Si                                       | -0.143223 | 1.138521  | 0.000000                                  |    |           |           |           |
| C                                        | -0.540414 | -0.720716 | 0.000000                                  |    |           |           |           |
| C                                        | 0.480633  | -1.729932 | 0.000000                                  |    |           |           |           |
| C                                        | 1.757308  | -1.229013 | 0.000000                                  |    |           |           |           |
| C                                        | 1.766657  | 0.190478  | 0.000000                                  |    |           |           |           |
| C                                        | 1.742885  | 1.472321  | 0.000000                                  |    |           |           |           |
| Si                                       | -2.196531 | -0.107531 | 0.000000                                  |    |           |           |           |
| H                                        | 0.279587  | -2.797527 | 0.000000                                  |    |           |           |           |
| H                                        | 2.671613  | -1.808013 | 0.000000                                  |    |           |           |           |
| $\tilde{X}^1 A'$ ; B3LYP/6-311++G(2d,2p) |           |           | $\tilde{X}^3 A'$ ; UB3LYP/6-311++G(2d,2p) |    |           |           |           |
| Si                                       | -0.029738 | 0.000000  | -0.015815                                 | Si | -0.865779 | -0.937859 | -0.000000 |
| C                                        | 0.001581  | 0.000000  | 1.873199                                  | C  | -0.145619 | 0.746296  | -0.000000 |
| C                                        | 1.203572  | -0.000000 | 2.636611                                  | C  | 1.273456  | 0.827809  | 0.000000  |
| C                                        | 2.364748  | -0.000000 | 1.910583                                  | C  | 2.116055  | -0.273518 | 0.000000  |
| C                                        | 2.132593  | -0.000000 | 0.527065                                  | C  | 1.417809  | -1.469423 | 0.000000  |
| C                                        | 1.745248  | -0.000000 | -0.671303                                 | C  | 0.413857  | -2.214088 | 0.000000  |
| Si                                       | -1.745677 | 0.000000  | 1.691907                                  | Si | -1.458239 | 2.037891  | -0.000000 |
| H                                        | 1.226369  | -0.000000 | 3.722199                                  | H  | 1.727383  | 1.814993  | 0.000000  |
| H                                        | 3.360837  | -0.000000 | 2.329278                                  | H  | 3.191384  | -0.198139 | 0.000000  |

Table S31: Optimized geometries of the singlet and triplet ground electronic states of isomer **7** ( $C_s$ ) of  $\text{Si}_2\text{C}_5\text{H}_2$  in Cartesian coordinates (in Ångström units) at different levels.

| $\tilde{X}^1A'$ ; fc-CCSD(T)/cc-pVTZ     |           |           |           |
|------------------------------------------|-----------|-----------|-----------|
| C                                        | -0.961235 | 0.825952  | 0.000000  |
| C                                        | -0.733936 | -0.656618 | 0.000000  |
| C                                        | 0.489795  | -1.296881 | 0.000000  |
| Si                                       | 2.153160  | -0.525772 | 0.000000  |
| C                                        | 1.542564  | 1.347582  | 0.000000  |
| C                                        | 0.242772  | 1.367906  | 0.000000  |
| Si                                       | -2.499287 | -0.146876 | 0.000000  |
| H                                        | 0.442506  | -2.387270 | 0.000000  |
| H                                        | 2.260405  | 2.152455  | 0.000000  |
| $\tilde{X}^1A'$ ; B3LYP/6-311++G(2d,2p)  |           |           |           |
| C                                        | 0.018410  | -0.000000 | 0.020649  |
| C                                        | -0.000994 | -0.000000 | 1.503191  |
| C                                        | 1.103972  | 0.000000  | 2.319565  |
| Si                                       | 2.854978  | 0.000000  | 1.803193  |
| C                                        | 2.545179  | 0.000000  | -0.148973 |
| C                                        | 1.275219  | 0.000000  | -0.357251 |
| Si                                       | -1.656142 | -0.000000 | 0.721751  |
| H                                        | 0.904831  | 0.000000  | 3.390338  |
| H                                        | 3.385188  | 0.000000  | -0.821303 |
| $\tilde{X}^3A'$ ; UB3LYP/6-311++G(2d,2p) |           |           |           |
| C                                        | -1.136573 | 0.172843  | 0.000000  |
| C                                        | 0.056091  | 0.961679  | 0.000000  |
| C                                        | 1.380639  | 0.609942  | 0.000000  |
| Si                                       | 1.603420  | -1.178782 | 0.000000  |
| C                                        | -0.026750 | -2.019017 | 0.000000  |
| C                                        | -1.109646 | -1.207120 | 0.000000  |
| Si                                       | -1.551909 | 1.919003  | 0.000000  |
| H                                        | 2.195288  | 1.318854  | 0.000000  |
| H                                        | -0.117264 | -3.099017 | 0.000000  |

Table S32: Optimized geometries of the singlet and triplet ground electronic states of isomer **8** ( $C_s$ ) of  $\text{Si}_2\text{C}_5\text{H}_2$  in Cartesian coordinates (in Ångström units) at different levels.

| $\tilde{X}^1A'$ ; fc-CCSD(T)/cc-pVTZ    |           |                                           |           |
|-----------------------------------------|-----------|-------------------------------------------|-----------|
| C                                       | -0.765967 | 0.755058                                  | 0.000000  |
| C                                       | -0.525719 | -0.638089                                 | 0.000000  |
| Si                                      | 1.180065  | -1.203662                                 | 0.000000  |
| C                                       | 2.213735  | 0.220029                                  | 0.000000  |
| C                                       | 1.428519  | 1.224128                                  | 0.000000  |
| C                                       | 0.183697  | 1.807333                                  | 0.000000  |
| Si                                      | -2.324571 | -0.250427                                 | 0.000000  |
| H                                       | 1.643110  | -2.603311                                 | 0.000000  |
| H                                       | -0.047018 | 2.860699                                  | 0.000000  |
| $\tilde{X}^1A'$ ; B3LYP/6-311++G(2d,2p) |           | $\tilde{X}^3A''$ ; UB3LYP/6-311++G(2d,2p) |           |
| C                                       | 0.381099  | -0.000000                                 | 0.022527  |
| C                                       | 0.107881  | -0.000000                                 | 1.396890  |
| Si                                      | 1.498868  | 0.000000                                  | 2.529710  |
| C                                       | 2.953176  | 0.000000                                  | 1.559466  |
| C                                       | 2.591216  | 0.000000                                  | 0.352012  |
| C                                       | 1.636010  | 0.000000                                  | -0.623918 |
| Si                                      | -1.430156 | -0.000000                                 | 0.400186  |
| H                                       | 1.441939  | 0.000000                                  | 3.998734  |
| H                                       | 1.789160  | 0.000000                                  | -1.690116 |
| C                                       | -1.095052 | -0.101113                                 | 0.000000  |
| C                                       | 0.037695  | 0.849076                                  | 0.000000  |
| Si                                      | 1.684249  | 0.188012                                  | 0.000000  |
| C                                       | 1.502760  | -1.572993                                 | 0.000000  |
| C                                       | 0.286466  | -1.849980                                 | 0.000000  |
| C                                       | -1.048305 | -1.482542                                 | 0.000000  |
| Si                                      | -1.591493 | 1.658029                                  | 0.000000  |
| H                                       | 2.932672  | 0.955978                                  | 0.000000  |
| H                                       | -1.908019 | -2.131106                                 | 0.000000  |

Table S33: Optimized geometries of the singlet and triplet ground electronic states of isomer **9** ( $C_s$ ) of  $\text{Si}_2\text{C}_5\text{H}_2$  in Cartesian coordinates (in Ångström units) at different levels.

| $\tilde{X}^1A'$ ; fc-CCSD(T)/cc-pVTZ    |           |           |                                          |    |           |           |          |
|-----------------------------------------|-----------|-----------|------------------------------------------|----|-----------|-----------|----------|
| Si                                      | 1.169064  | 1.235648  | 0.000000                                 |    |           |           |          |
| C                                       | -0.301725 | -0.056748 | 0.000000                                 |    |           |           |          |
| C                                       | 0.909490  | -0.713240 | 0.000000                                 |    |           |           |          |
| Si                                      | 2.655794  | -0.693076 | 0.000000                                 |    |           |           |          |
| C                                       | -1.617907 | -0.136811 | 0.000000                                 |    |           |           |          |
| C                                       | -2.888372 | -0.143724 | 0.000000                                 |    |           |           |          |
| C                                       | -4.216949 | -0.181335 | 0.000000                                 |    |           |           |          |
| H                                       | -4.747452 | -1.126390 | 0.000000                                 |    |           |           |          |
| H                                       | -4.800065 | 0.732258  | 0.000000                                 |    |           |           |          |
| $\tilde{X}^1A'$ ; B3LYP/6-311++G(2d,2p) |           |           | $\tilde{X}^3A'$ ; UB3LYP/6-311++G(2d,2p) |    |           |           |          |
| Si                                      | -0.844952 | -1.546098 | -0.000000                                | Si | -0.969417 | -1.577662 | 0.000000 |
| C                                       | 0.000000  | 0.237295  | 0.000000                                 | C  | -0.223463 | 0.093153  | 0.000000 |
| C                                       | 0.935139  | -0.748927 | 0.000000                                 | C  | 0.839337  | -0.742609 | 0.000000 |
| Si                                      | 1.452705  | -2.403518 | -0.000000                                | Si | 1.811660  | -2.204097 | 0.000000 |
| C                                       | -0.308492 | 1.507195  | 0.000000                                 | C  | -0.444082 | 1.466502  | 0.000000 |
| C                                       | -0.655119 | 2.719757  | 0.000000                                 | C  | -0.687467 | 2.667543  | 0.000000 |
| C                                       | -1.004785 | 3.989690  | 0.000000                                 | C  | -0.949298 | 4.008802  | 0.000000 |
| H                                       | -0.262807 | 4.778201  | 0.000000                                 | H  | -0.145902 | 4.731940  | 0.000000 |
| H                                       | -2.046195 | 4.286367  | 0.000000                                 | H  | -1.965874 | 4.376389  | 0.000000 |

Table S34: Optimized geometries of the singlet and triplet ground electronic states of isomer **10** ( $C_{2v}$ ) of  $\text{Si}_2\text{C}_5\text{H}_2$  in Cartesian coordinates (in Ångström units) at different levels.

| $\tilde{X}^1 A'$ ; fc-CCSD(T)/cc-pVTZ |          |           |           |
|---------------------------------------|----------|-----------|-----------|
| C                                     | 0.000000 | 0.000000  | 0.778391  |
| C                                     | 0.000000 | 0.000000  | -0.619049 |
| Si                                    | 0.000000 | -1.284841 | 2.044500  |
| Si                                    | 0.000000 | 1.284841  | 2.044500  |
| H                                     | 0.000000 | 0.000000  | 3.131377  |
| C                                     | 0.000000 | 0.000000  | -1.844027 |
| C                                     | 0.000000 | 0.000000  | -3.216068 |
| C                                     | 0.000000 | 0.000000  | -4.433679 |
| H                                     | 0.000000 | 0.000000  | -5.497310 |

  

| $\tilde{X}^1 A'$ ; B3LYP/6-311++G(2d,2p) |           |           | $\tilde{X}^3 A'$ ; UB3LYP/6-311++G(2d,2p) |    |           |           |           |
|------------------------------------------|-----------|-----------|-------------------------------------------|----|-----------|-----------|-----------|
| C                                        | -0.026977 | 0.000000  | 1.000000                                  | C  | 0.042226  | 0.000000  | 1.000000  |
| C                                        | 1.350532  | -0.000000 | 1.000000                                  | C  | 1.338449  | -0.000000 | 1.000000  |
| Si                                       | -1.289967 | 0.000000  | 2.283106                                  | Si | -1.352000 | 0.000000  | 2.246173  |
| Si                                       | -1.289967 | -0.000000 | -0.283106                                 | Si | -1.352000 | -0.000000 | -0.246173 |
| H                                        | -2.372387 | 0.000000  | 1.000000                                  | H  | -2.393715 | 0.000000  | 1.000000  |
| C                                        | 2.570216  | -0.000000 | 1.000000                                  | C  | 2.611915  | -0.000000 | 1.000000  |
| C                                        | 3.926495  | -0.000000 | 1.000000                                  | C  | 3.926479  | -0.000000 | 1.000000  |
| C                                        | 5.135052  | -0.000000 | 1.000000                                  | C  | 5.158252  | -0.000000 | 1.000000  |
| H                                        | 6.195738  | -0.000000 | 1.000000                                  | H  | 6.219129  | -0.000000 | 1.000000  |



Table S35: Optimized geometries of the singlet and triplet ground electronic states of isomer **11** ( $C_{2v}$ ) of  $\text{Si}_2\text{C}_5\text{H}_2$  in Cartesian coordinates (in Ångström units) at different levels.

| $\tilde{X}^1 A'$ ; fc-CCSD(T)/cc-pVTZ    |           |           |                                           |    |           |           |           |
|------------------------------------------|-----------|-----------|-------------------------------------------|----|-----------|-----------|-----------|
| C                                        | 0.000000  | 0.000000  | -0.223235                                 |    |           |           |           |
| C                                        | 0.000000  | 0.000000  | -1.470293                                 |    |           |           |           |
| C                                        | 0.000000  | 0.000000  | -2.835014                                 |    |           |           |           |
| C                                        | 0.000000  | 0.000000  | -4.054860                                 |    |           |           |           |
| Si                                       | 0.000000  | -1.317636 | 1.325584                                  |    |           |           |           |
| Si                                       | 0.000000  | 1.317636  | 1.325584                                  |    |           |           |           |
| C                                        | 0.000000  | 0.000000  | 2.529340                                  |    |           |           |           |
| H                                        | 0.000000  | 0.000000  | 3.608102                                  |    |           |           |           |
| H                                        | 0.000000  | 0.000000  | -5.119075                                 |    |           |           |           |
| $\tilde{X}^1 A'$ ; B3LYP/6-311++G(2d,2p) |           |           | $\tilde{X}^3 A'$ ; UB3LYP/6-311++G(2d,2p) |    |           |           |           |
| C                                        | -0.006949 | -0.000000 | 1.000000                                  | C  | -0.094000 | -0.000000 | 1.000000  |
| C                                        | 1.231265  | -0.000000 | 1.000000                                  | C  | 1.210891  | -0.000000 | 1.000000  |
| C                                        | 2.579903  | -0.000000 | 1.000000                                  | C  | 2.521208  | -0.000000 | 1.000000  |
| C                                        | 3.790849  | -0.000000 | 1.000000                                  | C  | 3.756194  | -0.000000 | 1.000000  |
| Si                                       | -1.545559 | 0.000000  | 2.310676                                  | Si | -1.466786 | 0.000000  | 2.307506  |
| Si                                       | -1.545559 | -0.000000 | -0.310676                                 | Si | -1.466786 | -0.000000 | -0.307506 |
| C                                        | -2.741106 | 0.000000  | 1.000000                                  | C  | -2.701439 | 0.000000  | 1.000000  |
| H                                        | -3.817127 | 0.000000  | 1.000000                                  | H  | -3.778469 | 0.000000  | 1.000000  |
| H                                        | 4.851935  | -0.000000 | 1.000000                                  | H  | 4.816839  | -0.000000 | 1.000000  |

Table S36: Optimized geometries of the singlet and triplet ground electronic states of isomer **12** ( $C_{2v}$ ) of  $\text{Si}_2\text{C}_5\text{H}_2$  in Cartesian coordinates (in Ångström units) at different levels.

| $\tilde{X}^1 A'$ ; fc-CCSD(T)/cc-pVTZ |           |           |          |
|---------------------------------------|-----------|-----------|----------|
| C                                     | -0.537753 | 0.578102  | 0.000000 |
| C                                     | -0.804350 | -0.804659 | 0.000000 |
| C                                     | 0.209080  | -1.784215 | 0.000000 |
| C                                     | 1.441659  | -1.187514 | 0.000000 |
| C                                     | 2.303213  | -0.234157 | 0.000000 |
| Si                                    | 1.106532  | 1.358773  | 0.000000 |
| Si                                    | -2.350048 | 0.217578  | 0.000000 |
| H                                     | 0.063968  | -2.854406 | 0.000000 |
| H                                     | 3.356845  | -0.035139 | 0.000000 |

  

| $\tilde{X}^1 A'$ ; B3LYP/6-311++G(2d,2p) |           |           | $\tilde{X}^3 A'$ ; UB3LYP/6-311++G(2d,2p) |    |           |           |           |
|------------------------------------------|-----------|-----------|-------------------------------------------|----|-----------|-----------|-----------|
| C                                        | -0.071837 | 0.000000  | 0.043245                                  | C  | -0.057498 | 0.000000  | -0.073040 |
| C                                        | -0.002149 | 0.000000  | 1.436443                                  | C  | 0.102114  | 0.000000  | 1.318558  |
| C                                        | 1.202782  | -0.000000 | 2.160810                                  | C  | 1.208293  | -0.000000 | 2.163325  |
| C                                        | 2.254022  | -0.000000 | 1.301511                                  | C  | 2.427742  | -0.000000 | 1.521086  |
| C                                        | 2.860636  | -0.000000 | 0.181776                                  | C  | 2.795889  | -0.000000 | 0.197241  |
| Si                                       | 1.341100  | -0.000000 | -1.105051                                 | Si | 1.479602  | -0.000000 | -1.026571 |
| Si                                       | -1.742811 | 0.000000  | 0.814644                                  | Si | -1.677468 | 0.000000  | 0.730951  |
| H                                        | 1.299031  | -0.000000 | 3.235407                                  | H  | 1.115306  | -0.000000 | 3.239567  |
| H                                        | 3.837904  | -0.000000 | -0.254005                                 | H  | 3.845748  | -0.000000 | -0.074038 |

Table S37: Optimized geometries of the singlet and triplet ground electronic states of isomer **13** ( $C_s$ ) of  $\text{Si}_2\text{C}_5\text{H}_2$  in Cartesian coordinates (in Ångström units) at different levels.

| $\tilde{X}^1A'$ ; fc-CCSD(T)/cc-pVTZ |           |           |          |
|--------------------------------------|-----------|-----------|----------|
| Si                                   | -2.299516 | 0.167156  | 0.000000 |
| C                                    | 0.145859  | -1.515898 | 0.000000 |
| C                                    | 1.509642  | -1.299187 | 0.000000 |
| Si                                   | 1.919374  | 0.438863  | 0.000000 |
| C                                    | 0.517818  | 1.526533  | 0.000000 |
| C                                    | -0.688624 | 1.168867  | 0.000000 |
| C                                    | -1.066128 | -1.193528 | 0.000000 |
| H                                    | 2.250482  | -2.089879 | 0.000000 |
| H                                    | 3.318355  | 0.903176  | 0.000000 |

  

| $\tilde{X}^1A'$ ; B3LYP/6-311++G(2d,2p) |           |           | $\tilde{X}^3A'$ ; UB3LYP/6-311++G(2d,2p) |    |           |           |          |
|-----------------------------------------|-----------|-----------|------------------------------------------|----|-----------|-----------|----------|
| Si                                      | -0.686703 | 0.000000  | -0.870736                                | Si | 0.103836  | -0.000000 | 0.191295 |
| C                                       | 0.099128  | 0.000000  | 1.981935                                 | C  | -0.032617 | -0.000000 | 2.923810 |
| C                                       | 1.272966  | -0.000000 | 2.681540                                 | C  | 0.956720  | -0.000000 | 3.903619 |
| Si                                      | 2.702508  | -0.000000 | 1.616117                                 | Si | 2.602597  | 0.000000  | 3.295186 |
| C                                       | 2.331932  | -0.000000 | -0.106467                                | C  | 2.729301  | 0.000000  | 1.524157 |
| C                                       | 1.188594  | -0.000000 | -0.599768                                | C  | 1.856541  | 0.000000  | 0.647411 |
| C                                       | -0.603619 | 0.000000  | 0.957498                                 | C  | -0.624066 | -0.000000 | 1.842844 |
| H                                       | 1.343841  | -0.000000 | 3.761203                                 | H  | 0.736441  | -0.000000 | 4.961719 |
| H                                       | 4.066658  | -0.000000 | 2.164209                                 | H  | 3.766103  | 0.000000  | 4.187351 |

Table S38: Optimized geometries of the singlet and triplet ground electronic states of isomer **14** ( $C_{2v}$ ) of  $\text{Si}_2\text{C}_5\text{H}_2$  in Cartesian coordinates (in Ångström units) at different levels.

| $\tilde{X}^1 A'$ ; fc-CCSD(T)/cc-pVTZ |          |           |           |
|---------------------------------------|----------|-----------|-----------|
| C                                     | 0.000000 | 0.000000  | -0.862419 |
| C                                     | 0.000000 | 0.000000  | -2.270101 |
| C                                     | 0.000000 | 0.000000  | -3.488455 |
| H                                     | 0.000000 | 0.000000  | -4.551348 |
| Si                                    | 0.000000 | -1.329243 | 0.347438  |
| Si                                    | 0.000000 | 1.329243  | 0.347438  |
| C                                     | 0.000000 | 0.000000  | 1.896780  |
| C                                     | 0.000000 | 0.000000  | 3.133634  |
| H                                     | 0.000000 | 0.000000  | 4.200338  |

  

| $\tilde{X}^1 A'$ ; B3LYP/6-311++G(2d,2p) |           |           | $\tilde{X}^3 A'$ ; UB3LYP/6-311++G(2d,2p) |    |           |           |           |
|------------------------------------------|-----------|-----------|-------------------------------------------|----|-----------|-----------|-----------|
| Si                                       | 1.871386  | 0.796348  | 1.001197                                  | Si | 0.395394  | -1.412866 | -0.089340 |
| Si                                       | 2.042813  | -1.844166 | 0.997939                                  | Si | 0.488885  | 1.211377  | -0.082961 |
| C                                        | 3.162856  | -0.445633 | 0.999936                                  | C  | -0.826672 | -0.063061 | 0.008202  |
| C                                        | 4.550271  | -0.355290 | 1.000081                                  | C  | -2.202825 | 0.005355  | 0.011830  |
| C                                        | 5.756896  | -0.276886 | 1.000171                                  | C  | -3.413553 | 0.067256  | 0.025358  |
| H                                        | 6.814865  | -0.208009 | 1.000336                                  | H  | -4.472787 | 0.120336  | 0.036783  |
| C                                        | -0.806270 | -0.703587 | 1.000109                                  | C  | 3.096492  | -0.229912 | 0.029142  |
| C                                        | 0.414640  | -0.624216 | 0.999795                                  | C  | 1.794345  | -0.158111 | 0.007026  |
| H                                        | -1.867188 | -0.772531 | 1.000442                                  | H  | 3.930423  | 0.459598  | 0.055535  |

Table S39: Optimized geometries of the singlet and triplet ground electronic states of isomer **15** ( $C_s$ ) of  $\text{Si}_2\text{C}_5\text{H}_2$  in Cartesian coordinates (in Ångström units) at different levels.

| $\tilde{X}^1A'$ ; fc-CCSD(T)/cc-pVTZ |           |           |          |
|--------------------------------------|-----------|-----------|----------|
| Si                                   | 0.141314  | 1.662813  | 0.000000 |
| C                                    | -0.969719 | 0.283997  | 0.000000 |
| C                                    | 0.271573  | -0.369496 | 0.000000 |
| C                                    | -2.264282 | -0.276001 | 0.000000 |
| C                                    | -3.388080 | -0.740726 | 0.000000 |
| H                                    | -4.369058 | -1.151207 | 0.000000 |
| C                                    | 0.983910  | -1.564024 | 0.000000 |
| H                                    | 0.594006  | -2.570637 | 0.000000 |
| Si                                   | 2.296544  | -0.385118 | 0.000000 |

  

| $\tilde{X}^1A'$ ; B3LYP/6-311++G(2d,2p) |           |           | $\tilde{X}^3A'$ ; UB3LYP/6-311++G(2d,2p) |    |           |           |          |
|-----------------------------------------|-----------|-----------|------------------------------------------|----|-----------|-----------|----------|
| Si                                      | -0.029022 | 0.000000  | 0.024034                                 | Si | 0.144050  | 0.000000  | 0.093227 |
| C                                       | 0.011744  | 0.000000  | 1.788884                                 | C  | 0.142924  | 0.000000  | 2.031841 |
| C                                       | 1.375243  | -0.000000 | 1.498810                                 | C  | 1.494095  | -0.000000 | 1.939607 |
| C                                       | -0.647526 | 0.000000  | 3.020268                                 | C  | -0.736227 | 0.000000  | 3.085344 |
| C                                       | -1.233849 | 0.000000  | 4.074056                                 | C  | -1.566121 | 0.000000  | 3.972105 |
| H                                       | -1.750123 | 0.000000  | 5.000387                                 | H  | -2.284795 | 0.000000  | 4.752898 |
| C                                       | 2.669503  | -0.000000 | 1.976594                                 | C  | 2.810182  | -0.000000 | 1.932754 |
| H                                       | 3.004106  | -0.000000 | 3.001263                                 | H  | 3.548252  | -0.000000 | 2.721260 |
| Si                                      | 2.985876  | -0.000000 | 0.252192                                 | Si | 2.621461  | -0.000000 | 0.039203 |

Table S40: Optimized geometries of the singlet and triplet ground electronic states of isomer **16** ( $C_s$ ) of  $\text{Si}_2\text{C}_5\text{H}_2$  in Cartesian coordinates (in Ångström units) at different levels.

| $\tilde{X}^1 A'$ ; fc-CCSD(T)/cc-pVTZ    |           |           |                                           |    |           |           |           |
|------------------------------------------|-----------|-----------|-------------------------------------------|----|-----------|-----------|-----------|
| C                                        | -0.664105 | 0.872165  | 0.000000                                  |    |           |           |           |
| Si                                       | -0.318731 | -1.073408 | 0.000000                                  |    |           |           |           |
| C                                        | 1.519565  | -1.163280 | 0.000000                                  |    |           |           |           |
| C                                        | 2.377375  | -0.058519 | 0.000000                                  |    |           |           |           |
| C                                        | 1.849571  | 1.268628  | 0.000000                                  |    |           |           |           |
| C                                        | 0.577637  | 1.347097  | 0.000000                                  |    |           |           |           |
| Si                                       | -2.304444 | 0.187692  | 0.000000                                  |    |           |           |           |
| H                                        | 1.976624  | -2.150158 | 0.000000                                  |    |           |           |           |
| H                                        | 3.448778  | -0.244587 | 0.000000                                  |    |           |           |           |
| $\tilde{X}^1 A'$ ; B3LYP/6-311++G(2d,2p) |           |           | $\tilde{X}^3 A'$ ; UB3LYP/6-311++G(2d,2p) |    |           |           |           |
| C                                        | -0.145076 | -0.000000 | 0.099404                                  | C  | -1.014204 | -0.696996 | -0.000000 |
| Si                                       | -0.110507 | -0.000000 | 2.071770                                  | Si | 0.023532  | 0.954240  | -0.000000 |
| C                                        | 1.683990  | 0.000000  | 2.434448                                  | C  | 1.781900  | 0.633637  | 0.000000  |
| C                                        | 2.688750  | 0.000000  | 1.471483                                  | C  | 2.264939  | -0.704917 | 0.000000  |
| C                                        | 2.376418  | 0.000000  | 0.083591                                  | C  | 1.312319  | -1.693389 | 0.000000  |
| C                                        | 1.138088  | 0.000000  | -0.179908                                 | C  | 0.017242  | -1.449398 | 0.000000  |
| Si                                       | -1.869927 | -0.000000 | 0.495449                                  | Si | -2.327320 | 0.648575  | -0.000000 |
| H                                        | 1.984929  | 0.000000  | 3.476619                                  | H  | 2.487587  | 1.453217  | 0.000000  |
| H                                        | 3.719600  | 0.000000  | 1.814365                                  | H  | 3.326647  | -0.918934 | 0.000000  |

Table S41: Optimized geometries of the singlet and triplet ground electronic states of isomer **17** ( $C_s$ ) of  $\text{Si}_2\text{C}_5\text{H}_2$  in Cartesian coordinates (in Ångström units) at different levels.

| $\tilde{X}^1 A'$ ; fc-CCSD(T)/cc-pVTZ |           |           |          |
|---------------------------------------|-----------|-----------|----------|
| C                                     | -0.485880 | 1.252938  | 0.000000 |
| Si                                    | -2.145665 | 0.406106  | 0.000000 |
| C                                     | -1.325857 | -1.295400 | 0.000000 |
| C                                     | 0.014322  | -1.446154 | 0.000000 |
| C                                     | 1.289202  | -1.358074 | 0.000000 |
| Si                                    | 1.992442  | 0.229631  | 0.000000 |
| C                                     | 0.743502  | 1.502077  | 0.000000 |
| H                                     | -1.978803 | -2.163113 | 0.000000 |
| H                                     | 3.430678  | 0.525310  | 0.000000 |

  

| $\tilde{X}^1 A'$ ; B3LYP/6-311++G(2d,2p) |           |           | $\tilde{X}^3 A'$ ; UB3LYP/6-311++G(2d,2p) |    |           |           |           |
|------------------------------------------|-----------|-----------|-------------------------------------------|----|-----------|-----------|-----------|
| C                                        | 0.391344  | 0.000000  | 0.579925                                  | C  | -0.200052 | -0.000000 | -0.061983 |
| Si                                       | -0.455863 | 0.000000  | 2.231267                                  | Si | 0.079814  | -0.000000 | 1.696724  |
| C                                        | 1.196056  | 0.000000  | 3.148187                                  | C  | 1.979853  | 0.000000  | 1.989246  |
| C                                        | 2.368914  | -0.000000 | 2.509345                                  | C  | 2.665214  | 0.000000  | 0.863616  |
| C                                        | 3.327753  | -0.000000 | 1.683278                                  | C  | 3.069375  | 0.000000  | -0.346100 |
| Si                                       | 2.993658  | -0.000000 | -0.010274                                 | Si | 2.051302  | -0.000000 | -1.722086 |
| C                                        | 1.245290  | -0.000000 | -0.317955                                 | C  | 0.361986  | -0.000000 | -1.169106 |
| H                                        | 1.141214  | 0.000000  | 4.230320                                  | H  | 2.372165  | 0.000000  | 2.993203  |
| H                                        | 3.992876  | -0.000000 | -1.079321                                 | H  | 2.441602  | -0.000000 | -3.130886 |

Table S42: Optimized geometries of the singlet and triplet ground electronic states of isomer **18** ( $C_s$ ) of  $\text{Si}_2\text{C}_5\text{H}_2$  in Cartesian coordinates (in Ångström units) at different levels.

| $\tilde{X}^1 A'$ ; fc-CCSD(T)/cc-pVTZ    |           |           |                                           |    |           |           |           |
|------------------------------------------|-----------|-----------|-------------------------------------------|----|-----------|-----------|-----------|
| C                                        | -2.923384 | 0.649573  | 0.000000                                  |    |           |           |           |
| Si                                       | -2.504456 | -1.133042 | 0.000000                                  |    |           |           |           |
| C                                        | -1.575362 | 0.465096  | 0.000000                                  |    |           |           |           |
| C                                        | -0.401696 | 1.308356  | 0.000000                                  |    |           |           |           |
| C                                        | 0.828795  | 0.779693  | 0.000000                                  |    |           |           |           |
| C                                        | 2.000416  | 0.261197  | 0.000000                                  |    |           |           |           |
| Si                                       | 3.539687  | -0.493412 | 0.000000                                  |    |           |           |           |
| H                                        | -3.575487 | 1.514871  | 0.000000                                  |    |           |           |           |
| H                                        | -0.500407 | 2.390756  | 0.000000                                  |    |           |           |           |
| $\tilde{X}^1 A'$ ; B3LYP/6-311++G(2d,2p) |           |           | $\tilde{X}^3 A'$ ; UB3LYP/6-311++G(2d,2p) |    |           |           |           |
| Si                                       | -2.905346 | 0.000000  | 0.887836                                  | Si | -2.683731 | 2.622144  | -0.000000 |
| C                                        | -0.031880 | 0.000000  | 1.642476                                  | C  | -0.038995 | 1.107344  | -0.000000 |
| C                                        | 1.258862  | -0.000000 | 1.965611                                  | C  | 1.162605  | 0.454914  | 0.000000  |
| C                                        | 2.308513  | -0.000000 | 0.988390                                  | C  | 1.293360  | -0.968710 | 0.000000  |
| C                                        | 3.660537  | -0.000000 | 1.009445                                  | C  | 2.324888  | -1.845283 | 0.000000  |
| Si                                       | 3.048902  | -0.000000 | -0.703089                                 | Si | 0.711854  | -2.721082 | 0.000000  |
| C                                        | -1.264190 | 0.000000  | 1.337280                                  | C  | -1.118756 | 1.728501  | -0.000000 |
| H                                        | 1.507577  | -0.000000 | 3.024392                                  | H  | 2.071085  | 1.055287  | 0.000000  |
| H                                        | 4.407601  | -0.000000 | 1.792496                                  | H  | 3.403168  | -1.749738 | 0.000000  |

## 1 Various Other Isomers of $\text{Si}_2\text{C}_5\text{H}_2$

On the basis of the systematic approach explained in the main part of the article, we had obtained several geometries of  $\text{Si}_2\text{C}_5\text{H}_2$ . Here below, these other possibilities are given as a further information.



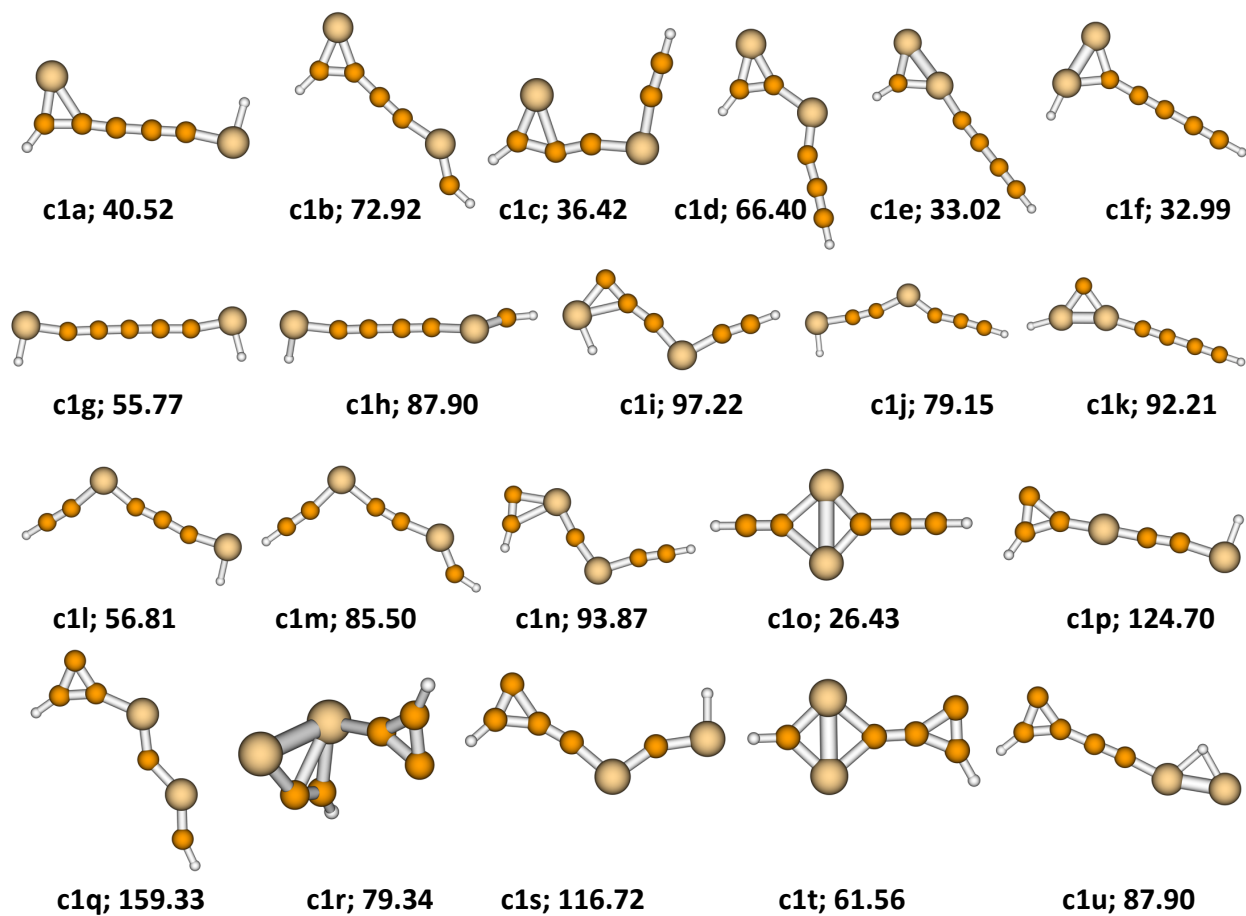

Figure S1: Various structural possibilities obtained for  $\text{Si}_2\text{C}_5\text{H}_2$  using the base  $\text{C}_7\text{H}_2$  geometry, 1-(buta-1,3-diynyl)cyclopropenyldiene.

Table S43: Computed energies of Si<sub>2</sub>C<sub>5</sub>H<sub>2</sub> isomers shown in Figure S1 in their singlet ground electronic states calculated at the B3LYP/6-311++G(2D,2P) level of theory.

| Isomer or<br>Label | $E$<br>a.u   | $ZPVE$<br>a.u | $E+ZPVE$<br>a.u | $\Delta E+ZPVE$<br>kcal mol <sup>-1</sup> | NImag |
|--------------------|--------------|---------------|-----------------|-------------------------------------------|-------|
| <b>1</b>           | -770.6783795 | 0.049725      | -770.628654     | 0.00                                      | 0     |
| <b>c1a</b>         | -770.6052473 | 0.041162      | -770.564086     | 40.52                                     | 0     |
| <b>c1b</b>         | -770.5562236 | 0.043777      | -770.512446     | 72.92                                     | 1     |
| <b>c1c</b>         | -770.6144366 | 0.043819      | -770.570617     | 36.42                                     | 0     |
| <b>c1d</b>         | -770.5662696 | 0.043438      | -770.522832     | 66.40                                     | 1     |
| <b>c1e</b>         | -770.6211584 | 0.045127      | -770.576031     | 33.02                                     | 0     |
| <b>c1f</b>         | -770.6190106 | 0.042928      | -770.576083     | 32.99                                     | 0     |
| <b>c1g</b>         | -770.5773429 | 0.037567      | -770.539776     | 55.77                                     | 0     |
| <b>c1h</b>         | -770.5281384 | 0.039559      | -770.488580     | 87.90                                     | 0     |
| <b>c1i</b>         | -770.5121510 | 0.038420      | -770.473731     | 97.22                                     | 1     |
| <b>c1j</b>         | -770.5414740 | 0.038962      | -770.502513     | 79.15                                     | 1     |
| <b>c1k</b>         | -770.5230602 | 0.041348      | -770.481712     | 92.21                                     | 0     |
| <b>c1l</b>         | -770.5778578 | 0.039736      | -770.538122     | 56.81                                     | 0     |
| <b>c1m</b>         | -770.5339309 | 0.041526      | -770.492405     | 85.50                                     | 1     |
| <b>c1n</b>         | -770.5200808 | 0.041016      | -770.479065     | 93.87                                     | 0     |
| <b>14; c1o</b>     | -770.6303640 | 0.043823      | -770.586541     | 26.43                                     | 0     |
| <b>c1p</b>         | -770.4685134 | 0.038588      | -770.429925     | 124.70                                    | 1     |
| <b>c1q</b>         | -770.4153651 | 0.040622      | -770.374743     | 159.33                                    | 2     |
| <b>c1r</b>         | -770.5454824 | 0.043270      | -770.502213     | 79.34                                     | 0     |
| <b>c1s</b>         | -770.4806785 | 0.038031      | -770.442648     | 116.72                                    | 0     |
| <b>c1t</b>         | -770.5741102 | 0.043563      | -770.530547     | 61.56                                     | 0     |
| <b>c1u</b>         | -770.5293502 | 0.040779      | -770.488571     | 87.90                                     | 0     |

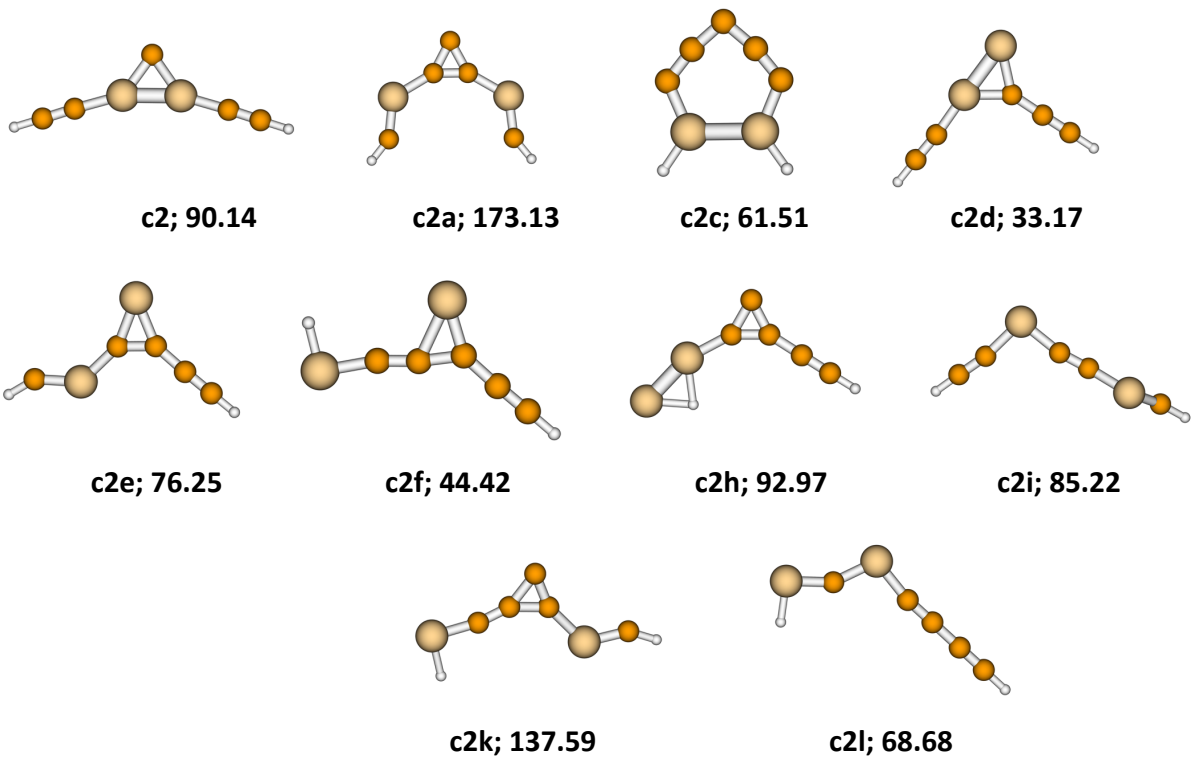

Figure S2: Various structural possibilities obtained for  $\text{Si}_2\text{C}_5\text{H}_2$  using the base geometry, 1,2-diethynylcyclopropenylidene ( $\text{C}_7\text{H}_2$ )

Table S44: Computed energies of Si<sub>2</sub>C<sub>5</sub>H<sub>2</sub> isomers shown in Figure S2 in their singlet ground electronic states calculated at the B3LYP/6-311++G(2D,2P) level of theory.

| Isomer or<br>Label | $E$<br>a.u   | $ZPVE$<br>a.u | $E+ZPVE$<br>a.u | $\Delta E+ZPVE$<br>kcal mol <sup>-1</sup> | NImag |
|--------------------|--------------|---------------|-----------------|-------------------------------------------|-------|
| <b>1</b>           | -770.6783795 | 0.049725      | -770.628654     | 0.00                                      | 0     |
| <b>c2</b>          | -770.5278997 | 0.042889      | -770.485011     | 90.14                                     | 0     |
| <b>c2a</b>         | -770.3927341 | 0.039985      | -770.352749     | 173.13                                    | 2     |
| <b>c2c</b>         | -770.5719557 | 0.041318      | -770.530637     | 61.51                                     | 0     |
| <b>c2d</b>         | -770.6203285 | 0.044535      | -770.575793     | 33.17                                     | 0     |
| <b>c2e</b>         | -770.5505321 | 0.043393      | -770.507139     | 76.25                                     | 0     |
| <b>c2f</b>         | -770.5993434 | 0.041472      | -770.557871     | 44.42                                     | 0     |
| <b>c2h</b>         | -770.5209474 | 0.040456      | -770.480491     | 92.97                                     | 1     |
| <b>c2i</b>         | -770.5343586 | 0.041515      | -770.492843     | 85.22                                     | 0     |
| <b>c2k</b>         | -770.4466510 | 0.037267      | -770.409384     | 137.59                                    | 1     |
| <b>c2l</b>         | -770.5595397 | 0.040334      | -770.519206     | 68.68                                     | 0     |

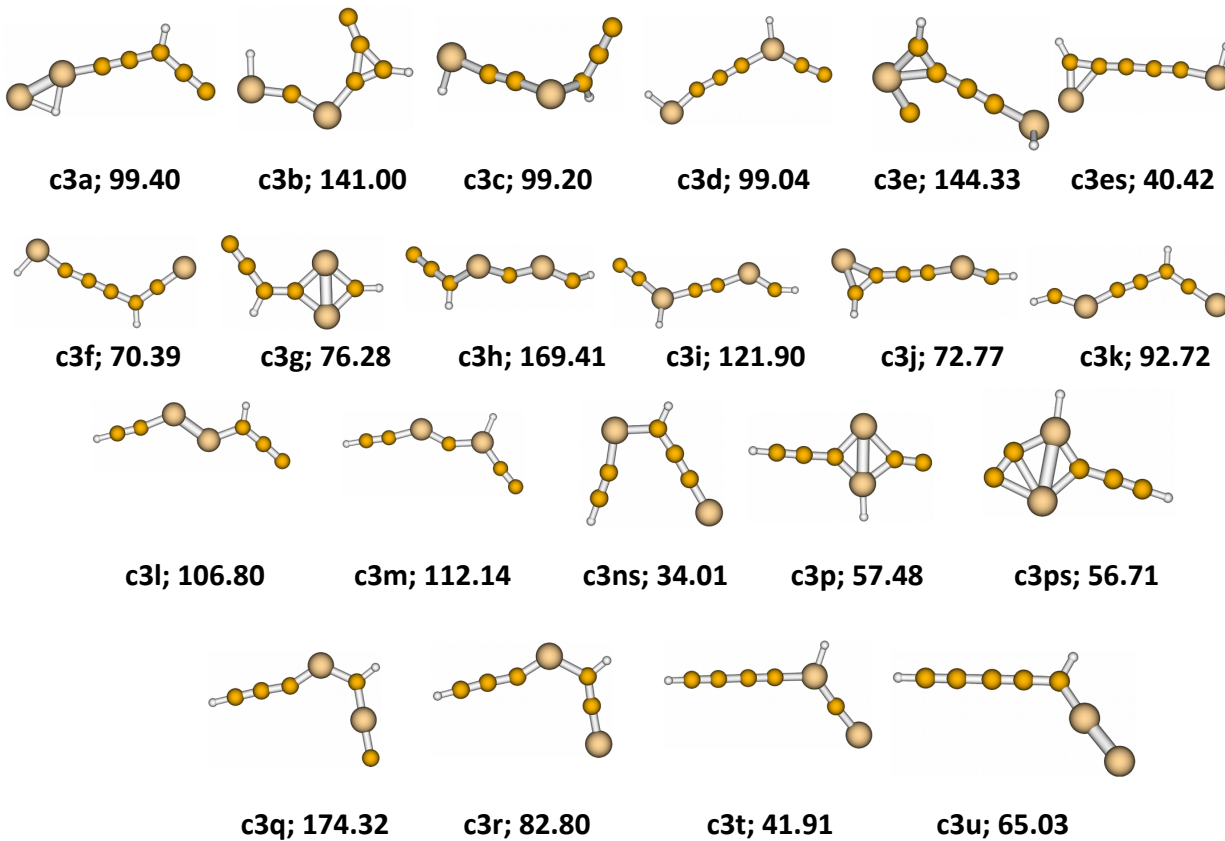

Figure S3: Various structural possibilities obtained for  $\text{Si}_2\text{C}_5\text{H}_2$  using the base geometry, 1-(buta-1,3-diyanyl)propadienyldiene ( $\text{C}_7\text{H}_2$ )

Table S45: Computed energies of Si<sub>2</sub>C<sub>5</sub>H<sub>2</sub> isomers shown in Figure S3 in their singlet ground electronic states calculated at the B3LYP/6-311++G(2D,2P) level of theory.

| Isomer or<br>Label | $E$<br>a.u   | $ZPVE$<br>a.u | $E+ZPVE$<br>a.u | $\Delta E+ZPVE$<br>kcal mol <sup>-1</sup> | NImag |
|--------------------|--------------|---------------|-----------------|-------------------------------------------|-------|
| <b>1</b>           | -770.6783795 | 0.049725      | -770.628654     | 0.00                                      | 0     |
| <b>c3a</b>         | -770.5107931 | 0.040537      | -770.470256     | 99.40                                     | 0     |
| <b>c3b</b>         | -770.4417465 | 0.037792      | -770.403955     | 141.00                                    | 0     |
| <b>c3c</b>         | -770.5090026 | 0.038426      | -770.470576     | 99.20                                     | 0     |
| <b>c3d</b>         | -770.5073715 | 0.036547      | -770.470824     | 99.04                                     | 0     |
| <b>c3e</b>         | -770.4368208 | 0.038176      | -770.398645     | 144.33                                    | 1     |
| <b>c3es</b>        | -770.6052339 | 0.040992      | -770.564242     | 40.42                                     | 0     |
| <b>c3f</b>         | -770.5574940 | 0.041020      | -770.516474     | 70.39                                     | 0     |
| <b>c3g</b>         | -770.5513028 | 0.044204      | -770.507098     | 76.28                                     | 0     |
| <b>c3h</b>         | -770.3984663 | 0.039778      | -770.358688     | 169.41                                    | 0     |
| <b>c3i</b>         | -770.4729829 | 0.038583      | -770.434400     | 121.90                                    | 1     |
| <b>c3j</b>         | -770.5564731 | 0.043792      | -770.512682     | 72.77                                     | 0     |
| <b>c3k</b>         | -770.5245284 | 0.043631      | -770.480898     | 92.72                                     | 0     |
| <b>c3l</b>         | -770.5005668 | 0.042102      | -770.458465     | 106.80                                    | 1     |
| <b>c3m</b>         | -770.4892907 | 0.039343      | -770.449948     | 112.14                                    | 0     |
| <b>c3ns</b>        | -770.6188970 | 0.044444      | -770.574453     | 34.01                                     | 0     |
| <b>c3p</b>         | -770.5778815 | 0.040831      | -770.537051     | 57.48                                     | 0     |
| <b>c3ps</b>        | -770.5790670 | 0.040788      | -770.538279     | 56.71                                     | 1     |
| <b>c3q</b>         | -770.3912325 | 0.040381      | -770.350852     | 174.32                                    | 1     |
| <b>c3r</b>         | -770.5396965 | 0.042986      | -770.496710     | 82.80                                     | 1     |
| <b>c3t</b>         | -770.6045943 | 0.042720      | -770.561874     | 41.91                                     | 0     |
| <b>c3u</b>         | -770.5701562 | 0.045129      | -770.525027     | 65.03                                     | 0     |

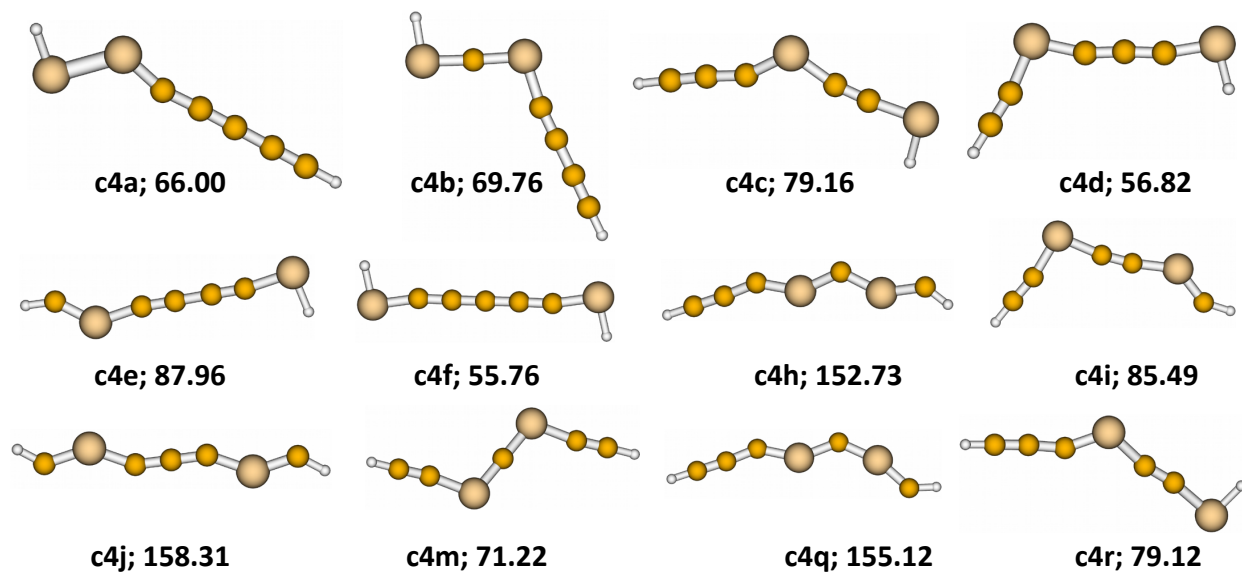

Figure S4: Various structural possibilities obtained for  $\text{Si}_2\text{C}_5\text{H}_2$  using the base  $\text{C}_7\text{H}_2$  geometry, buta-1,3-diynelethynylcarbene.

Table S46: Computed energies of Si<sub>2</sub>C<sub>5</sub>H<sub>2</sub> isomers shown in Figure S4 in their singlet ground electronic states calculated at the B3LYP/6-311++G(2D,2P) level of theory.

| Isomer or<br>Label | $E$<br>a.u   | $ZPVE$<br>a.u | $E+ZPVE$<br>a.u | $\Delta E+ZPVE$<br>kcal mol <sup>-1</sup> | NImag |
|--------------------|--------------|---------------|-----------------|-------------------------------------------|-------|
| <b>1</b>           | -770.6783795 | 0.049725      | -770.628654     | 0.00                                      | 0     |
| <b>c4a</b>         | -770.5640886 | 0.040620      | -770.523469     | 66.00                                     | 1     |
| <b>c4b</b>         | -770.5576392 | 0.040158      | -770.517481     | 69.76                                     | 0     |
| <b>c4c</b>         | -770.5414727 | 0.038970      | -770.502503     | 79.16                                     | 1     |
| <b>c4d</b>         | -770.5778563 | 0.039750      | -770.538107     | 56.82                                     | 0     |
| <b>c4e</b>         | -770.5279890 | 0.039504      | -770.488485     | 87.96                                     | 1     |
| <b>c4f</b>         | -770.5773429 | 0.037553      | -770.539790     | 55.76                                     | 0     |
| <b>c4h</b>         | -770.4250760 | 0.039819      | -770.385257     | 152.73                                    | 0     |
| <b>c4i</b>         | -770.5339620 | 0.041550      | -770.492412     | 85.49                                     | 1     |
| <b>c4j</b>         | -770.4153896 | 0.039021      | -770.376368     | 158.31                                    | 0     |
| <b>c4m</b>         | -770.5574488 | 0.042297      | -770.515152     | 71.22                                     | 0     |
| <b>c4q</b>         | -770.4209934 | 0.039546      | -770.381448     | 155.12                                    | 0     |
| <b>c4r</b>         | -770.5414245 | 0.038947      | -770.502477     | 79.18                                     | 1     |



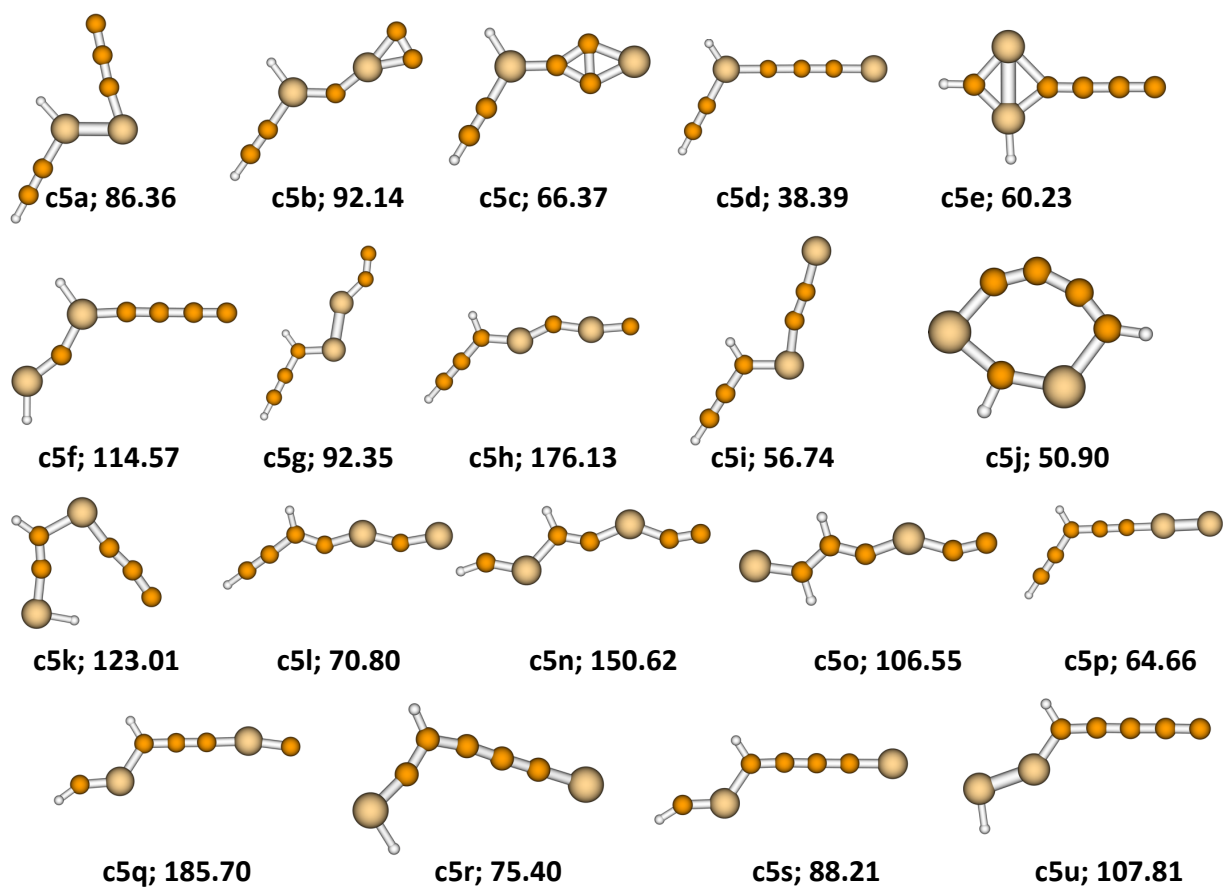

Figure S5: Various structural possibilities obtained for  $\text{Si}_2\text{C}_5\text{H}_2$  using the base  $\text{C}_7\text{H}_2$  geometry, 1-(ethynyl)pentatetraenyldiene.

Table S47: Computed energies of Si<sub>2</sub>C<sub>5</sub>H<sub>2</sub> isomers shown in Figure S5 in their singlet ground electronic states calculated at the B3LYP/6-311++G(2D,2P) level of theory.

| Isomer or<br>Label | $E$<br>a.u   | $ZPVE$<br>a.u | $E+ZPVE$<br>a.u | $\Delta E+ZPVE$<br>kcal mol <sup>-1</sup> | NImag |
|--------------------|--------------|---------------|-----------------|-------------------------------------------|-------|
| <b>1</b>           | -770.6783795 | 0.049725      | -770.628654     | 0.00                                      | 0     |
| <b>c5a</b>         | -770.5314552 | 0.040420      | -770.491035     | 86.36                                     | 0     |
| <b>c5b</b>         | -770.5218127 | 0.040000      | -770.481813     | 92.14                                     | 0     |
| <b>c5c</b>         | -770.5640983 | 0.041211      | -770.522888     | 66.37                                     | 0     |
| <b>c5d</b>         | -770.6101195 | 0.042637      | -770.567482     | 38.39                                     | 0     |
| <b>c5e</b>         | -770.5745464 | 0.041873      | -770.532673     | 60.23                                     | 0     |
| <b>c5f</b>         | -770.4833193 | 0.037239      | -770.446080     | 114.57                                    | 0     |
| <b>c5g</b>         | -770.5237135 | 0.042234      | -770.481479     | 92.35                                     | 0     |
| <b>c5h</b>         | -770.3884152 | 0.040447      | -770.347968     | 176.13                                    | 1     |
| <b>c5i</b>         | -770.5820796 | 0.043843      | -770.538236     | 56.74                                     | 0     |
| <b>c5j</b>         | -770.5920304 | 0.044491      | -770.547540     | 50.90                                     | 0     |
| <b>c5k</b>         | -770.4704804 | 0.037862      | -770.432619     | 123.01                                    | 1     |
| <b>c5l</b>         | -770.5601783 | 0.044351      | -770.515827     | 70.80                                     | 0     |
| <b>c5n</b>         | -770.4287059 | 0.040073      | -770.388633     | 150.62                                    | 0     |
| <b>c5o</b>         | -770.5019054 | 0.043043      | -770.458862     | 106.55                                    | 0     |
| <b>c5p</b>         | -770.5710211 | 0.045409      | -770.525612     | 64.66                                     | 1     |
| <b>c5q</b>         | -770.3730294 | 0.040308      | -770.332721     | 185.70                                    | 1     |
| <b>c5r</b>         | -770.5489934 | 0.040500      | -770.508493     | 75.40                                     | 1     |
| <b>c5s</b>         | -770.5314477 | 0.043360      | -770.488088     | 88.21                                     | 0     |
| <b>c5u</b>         | -770.4963145 | 0.039469      | -770.456845     | 107.81                                    | 0     |

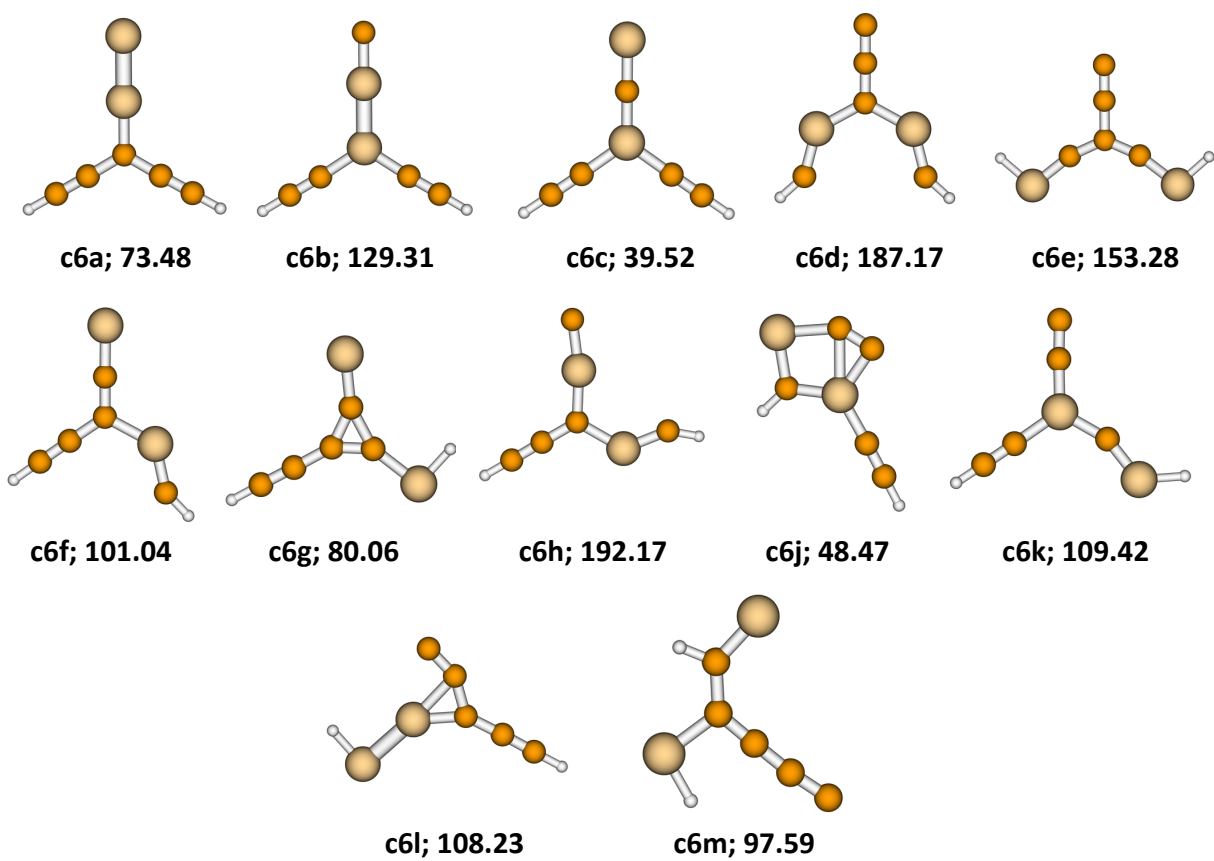

Figure S6: Various structural possibilities obtained for  $\text{Si}_2\text{C}_5\text{H}_2$  using the base  $\text{C}_7\text{H}_2$  geometry, 1,1-(diethynyl)propadienyldiene.

Table S48: Computed energies of Si<sub>2</sub>C<sub>5</sub>H<sub>2</sub> isomers shown in Figure S6 in their singlet ground electronic states calculated at the B3LYP/6-311++G(2D,2P) level of theory.

| Isomer or<br>Label | $E$<br>a.u   | $ZPVE$<br>a.u | $E+ZPVE$<br>a.u | $\Delta E+ZPVE$<br>kcal mol <sup>-1</sup> | NImag |
|--------------------|--------------|---------------|-----------------|-------------------------------------------|-------|
| <b>1</b>           | -770.6783795 | 0.049725      | -770.628654     | 0.00                                      | 0     |
| <b>c6a</b>         | -770.5562017 | 0.044645      | -770.511557     | 73.48                                     | 1     |
| <b>c6b</b>         | -770.4641999 | 0.041612      | -770.422588     | 129.31                                    | 2     |
| <b>c6c</b>         | -770.6094398 | 0.043761      | -770.565679     | 39.52                                     | 0     |
| <b>c6d</b>         | -770.3695251 | 0.039146      | -770.330379     | 187.17                                    | 1     |
| <b>c6e</b>         | -770.4190760 | 0.034694      | -770.384382     | 153.28                                    | 0     |
| <b>c6f</b>         | -770.5103313 | 0.042694      | -770.467637     | 101.04                                    | 1     |
| <b>c6g</b>         | -770.5417496 | 0.040684      | -770.501065     | 80.06                                     | 0     |
| <b>c6h</b>         | -770.3624469 | 0.040036      | -770.322410     | 192.17                                    | 1     |
| <b>c6j</b>         | -770.5950156 | 0.043607      | -770.551408     | 48.47                                     | 1     |
| <b>c6k</b>         | -770.4926116 | 0.038323      | -770.454288     | 109.42                                    | 0     |
| <b>c6l</b>         | -770.4955756 | 0.039391      | -770.456185     | 108.23                                    | 0     |
| <b>c6m</b>         | -770.5135895 | 0.040454      | -770.473135     | 97.59                                     | 0     |

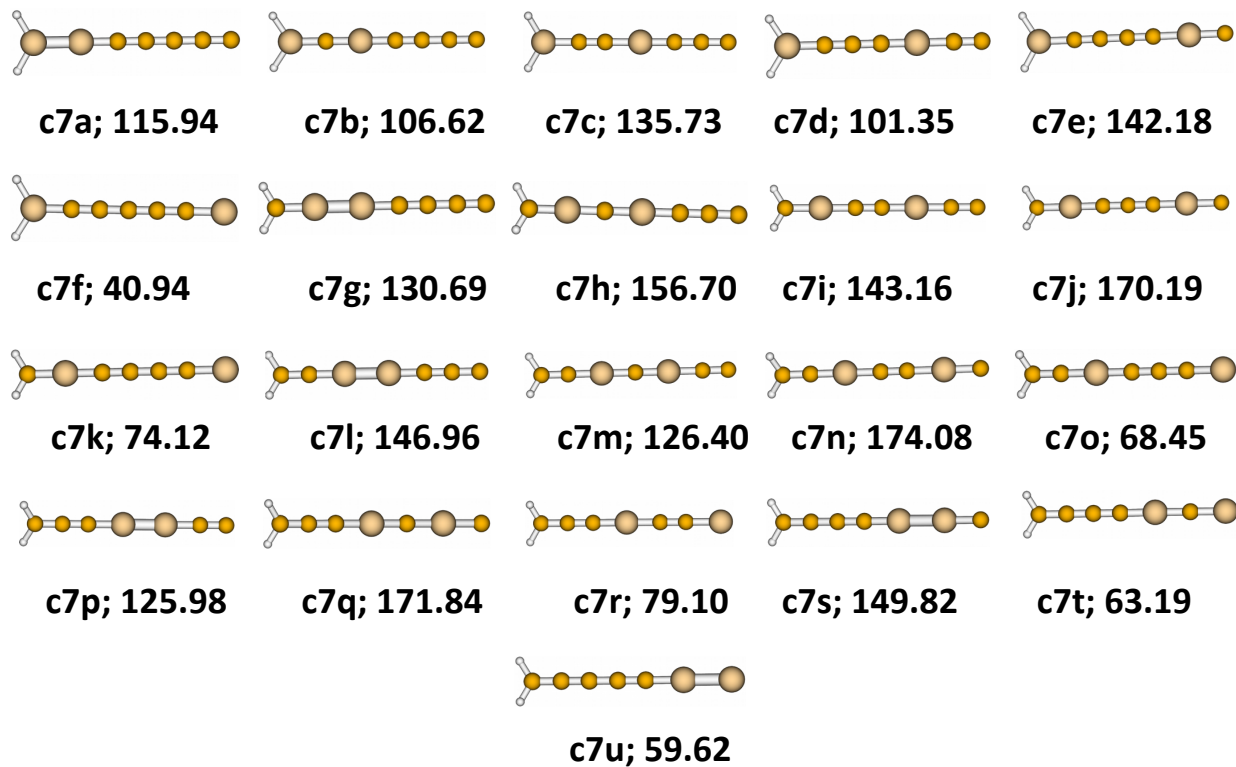

Figure S7: Various structural possibilities obtained for  $\text{Si}_2\text{C}_5\text{H}_2$  using the base  $\text{C}_7\text{H}_2$  geometry, heptahexaenyldiene.

Table S49: Computed energies of Si<sub>2</sub>C<sub>5</sub>H<sub>2</sub> isomers shown in Figure S7 in their singlet ground electronic states calculated at the B3LYP/6-311++G(2D,2P) level of theory.

| Isomer or<br>Label | $E$<br>a.u   | $ZPVE$<br>a.u | $E+ZPVE$<br>a.u | $\Delta E+ZPVE$<br>kcal mol <sup>-1</sup> | NImag |
|--------------------|--------------|---------------|-----------------|-------------------------------------------|-------|
| <b>1</b>           | -770.6783795 | 0.049725      | -770.628654     | 0.00                                      | 0     |
| <b>c7a</b>         | -770.4818971 | 0.038003      | -770.443894     | 115.94                                    | 2     |
| <b>c7b</b>         | -770.4969221 | 0.038172      | -770.458750     | 106.62                                    | 1     |
| <b>c7c</b>         | -770.4488082 | 0.036447      | -770.412362     | 135.73                                    | 2     |
| <b>c7d</b>         | -770.5048258 | 0.037686      | -770.467140     | 101.35                                    | 1     |
| <b>c7e</b>         | -770.4395925 | 0.037511      | -770.402081     | 142.18                                    | 2     |
| <b>c7f</b>         | -770.6048300 | 0.041418      | -770.563412     | 40.94                                     | 0     |
| <b>c7g</b>         | -770.4626383 | 0.042254      | -770.420385     | 130.69                                    | 2     |
| <b>c7h</b>         | -770.4185428 | 0.039610      | -770.378933     | 156.70                                    | 3     |
| <b>c7i</b>         | -770.4404315 | 0.039918      | -770.400514     | 143.16                                    | 2     |
| <b>c7j</b>         | -770.3974557 | 0.040023      | -770.357433     | 170.19                                    | 2     |
| <b>c7k</b>         | -770.5538651 | 0.043321      | -770.510544     | 74.12                                     | 1     |
| <b>c7l</b>         | -770.4363644 | 0.041900      | -770.394465     | 146.96                                    | 3     |
| <b>c7m</b>         | -770.4685836 | 0.041367      | -770.427216     | 126.40                                    | 3     |
| <b>c7n</b>         | -770.3917528 | 0.040509      | -770.351244     | 174.08                                    | 4     |
| <b>c7o</b>         | -770.5639069 | 0.044334      | -770.519573     | 68.45                                     | 1     |
| <b>c7p</b>         | -770.4702053 | 0.042310      | -770.427895     | 125.98                                    | 2     |
| <b>c7q</b>         | -770.3953198 | 0.040516      | -770.354804     | 171.84                                    | 3     |
| <b>c7r</b>         | -770.5459019 | 0.043308      | -770.502594     | 79.10                                     | 2     |
| <b>c7s</b>         | -770.4321491 | 0.042255      | -770.389894     | 149.82                                    | 3     |
| <b>c7t</b>         | -770.5718824 | 0.043933      | -770.527950     | 63.19                                     | 1     |
| <b>c7u</b>         | -770.5792553 | 0.045606      | -770.533649     | 59.62                                     | 1     |

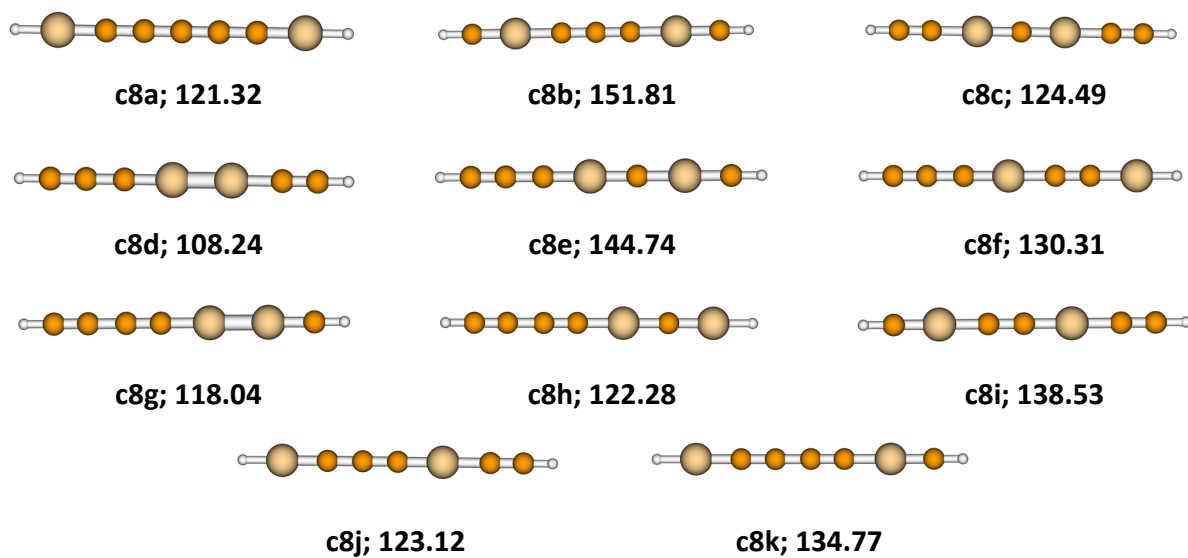

Figure S8: Various structural possibilities obtained for  $\text{Si}_2\text{C}_5\text{H}_2$  using the base  $\text{C}_7\text{H}_2$  geometry, hexatriynylidene.

Table S50: Computed energies of Si<sub>2</sub>C<sub>5</sub>H<sub>2</sub> isomers shown in Figure S8 in their triplet ground electronic states calculated at the UB3LYP/6-311++G(2D,2P) level of theory.

| Isomer or<br>Label | $E$<br>a.u   | $ZPVE$<br>a.u | $E+ZPVE$<br>a.u | $\Delta E+ZPVE$<br>kcal mol <sup>-1</sup> | NImag |
|--------------------|--------------|---------------|-----------------|-------------------------------------------|-------|
| <b>1</b>           | -770.6783795 | 0.049725      | -770.628654     | 0.00                                      | 0     |
| <b>c8a</b>         | -770.4702368 | 0.034912      | -770.435324     | 121.32                                    | 4     |
| <b>c8b</b>         | -770.4248521 | 0.038127      | -770.386725     | 151.81                                    | 4     |
| <b>c8c</b>         | -770.4705217 | 0.040249      | -770.430273     | 124.49                                    | 4     |
| <b>c8d</b>         | -770.4972891 | 0.041130      | -770.456159     | 108.24                                    | 4     |
| <b>c8e</b>         | -770.4365091 | 0.038515      | -770.397994     | 144.74                                    | 4     |
| <b>c8f</b>         | -770.4583353 | 0.037340      | -770.420996     | 130.31                                    | 4     |
| <b>c8g</b>         | -770.4816449 | 0.041096      | -770.440549     | 118.04                                    | 4     |
| <b>c8h</b>         | -770.4718362 | 0.038040      | -770.433796     | 122.28                                    | 4     |
| <b>c8i</b>         | -770.4472557 | 0.039362      | -770.407894     | 138.53                                    | 4     |
| <b>c8j</b>         | -770.4701865 | 0.037739      | -770.432448     | 123.12                                    | 4     |
| <b>c8k</b>         | -770.4511470 | 0.037266      | -770.413882     | 134.77                                    | 4     |



Table S51: Computed energies of Si<sub>2</sub>C<sub>5</sub>H<sub>2</sub> isomers shown in Figure S8 in their singlet ground electronic states calculated at the B3LYP/6-311++G(2D,2P) level of theory.

| Isomer or<br>Label | $E$<br>a.u   | $ZPVE$<br>a.u | $E+ZPVE$<br>a.u | $\Delta E+ZPVE$<br>kcal mol <sup>-1</sup> | NImag |
|--------------------|--------------|---------------|-----------------|-------------------------------------------|-------|
| <b>1</b>           | -770.6783795 | 0.049725      | -770.628654     | 0.00                                      | 0     |
| <b>c8a</b>         | -770.4468455 | 0.036357      | -770.410488     | 136.90                                    | 2     |
| <b>c8b</b>         | -770.3991762 | 0.039064      | -770.360112     | 168.51                                    | 4     |
| <b>c8c</b>         | -770.4494617 | 0.041149      | -770.408313     | 138.27                                    | 2     |
| <b>c8d</b>         | -770.4732788 | 0.041796      | -770.431483     | 123.73                                    | 3     |
| <b>c8e</b>         | -770.4119794 | 0.039128      | -770.372852     | 160.52                                    | 5     |
| <b>c8f</b>         | -770.4336879 | 0.038256      | -770.395432     | 146.35                                    | 3     |
| <b>c8g</b>         | -770.4558674 | 0.042330      | -770.413538     | 134.99                                    | 3     |
| <b>c8h</b>         | -770.4504333 | 0.039453      | -770.410981     | 136.59                                    | 2     |
| <b>c8i</b>         | -770.4235990 | 0.040195      | -770.383404     | 153.90                                    | 3     |
| <b>c8j</b>         | -770.4479685 | 0.039106      | -770.408863     | 137.92                                    | 2     |
| <b>c8k</b>         | -770.4265339 | 0.038582      | -770.387952     | 151.04                                    | 3     |

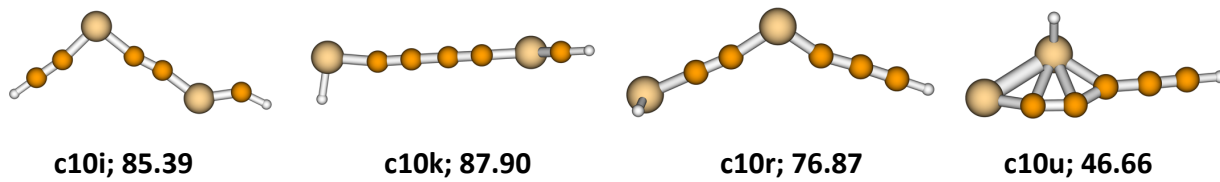

Figure S9: Various structural possibilities obtained for  $\text{Si}_2\text{C}_5\text{H}_2$  using the base  $\text{C}_7\text{H}_2$  geometry, *bent*-1,3,5-hexatriynylcarbene.

Table S52: Computed energies of Si<sub>2</sub>C<sub>5</sub>H<sub>2</sub> isomers shown in Figure S9 in their singlet ground electronic states calculated at the B3LYP/6-311++G(2D,2P) level of theory.

| Isomer or<br>Label | $E$<br>a.u   | $ZPVE$<br>a.u | $E+ZPVE$<br>a.u | $\Delta E+ZPVE$<br>kcal mol <sup>-1</sup> | NImag |
|--------------------|--------------|---------------|-----------------|-------------------------------------------|-------|
| <b>1</b>           | -770.6783795 | 0.049725      | -770.628654     | 0.00                                      | 0     |
| <b>c10i</b>        | -770.5340330 | 0.041449      | -770.492584     | 85.39                                     | 1     |
| <b>c10k</b>        | -770.5281384 | 0.039564      | -770.488574     | 87.90                                     | 0     |
| <b>c10r</b>        | -770.5451901 | 0.039043      | -770.506147     | 76.87                                     | 0     |
| <b>c10u</b>        | -770.5970300 | 0.042729      | -770.554302     | 46.66                                     | 0     |

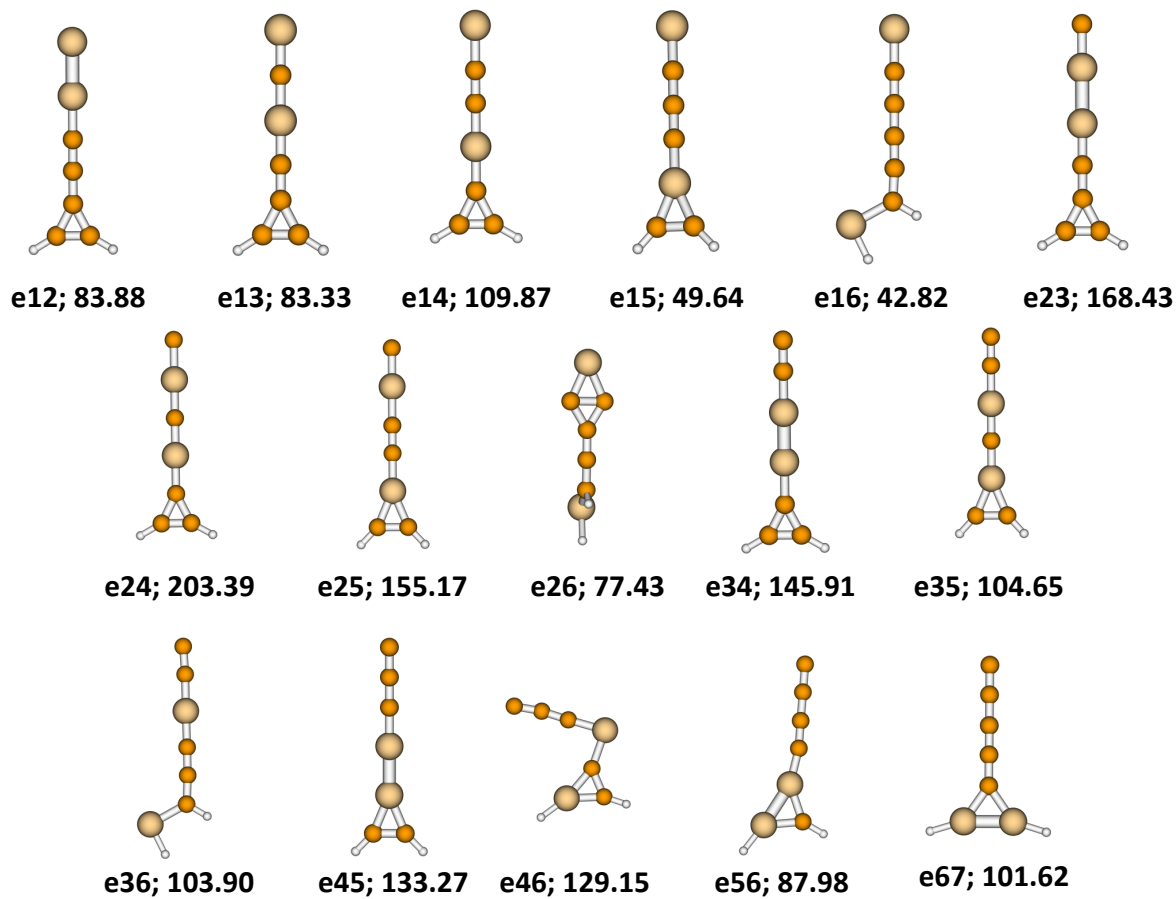

Figure S10: Various structural possibilities obtained for  $\text{Si}_2\text{C}_5\text{H}_2$  using the base  $\text{C}_7\text{H}_2$  geometry, 3-(didehydrobutatrienylidene)cyclopropene.

Table S53: Computed energies of Si<sub>2</sub>C<sub>5</sub>H<sub>2</sub> isomers shown in Figure S10 in their singlet ground electronic states calculated at the B3LYP/6-311++G(2D,2P) level of theory.

| Isomer or<br>Label | $E$<br>a.u   | $ZPVE$<br>a.u | $E+ZPVE$<br>a.u | $\Delta E+ZPVE$<br>kcal mol <sup>-1</sup> | NImag |
|--------------------|--------------|---------------|-----------------|-------------------------------------------|-------|
| <b>1</b>           | -770.6783795 | 0.049725      | -770.628654     | 0.00                                      | 0     |
| <b>e12</b>         | -770.5406767 | 0.045696      | -770.494980     | 83.88                                     | 1     |
| <b>e13</b>         | -770.5405104 | 0.044655      | -770.495856     | 83.33                                     | 1     |
| <b>e14</b>         | -770.4972920 | 0.043724      | -770.453568     | 109.87                                    | 2     |
| <b>e15</b>         | -770.5956438 | 0.046103      | -770.549541     | 49.64                                     | 0     |
| <b>e16</b>         | -770.6029841 | 0.042565      | -770.560420     | 42.82                                     | 0     |
| <b>e23</b>         | -770.4030670 | 0.042816      | -770.360251     | 168.43                                    | 3     |
| <b>e24</b>         | -770.3454156 | 0.040880      | -770.304535     | 203.39                                    | 3     |
| <b>e25</b>         | -770.4237944 | 0.042427      | -770.381367     | 155.17                                    | 2     |
| <b>e26</b>         | -770.5467107 | 0.041449      | -770.505262     | 77.43                                     | 0     |
| <b>e34</b>         | -770.4392737 | 0.043150      | -770.396124     | 145.91                                    | 2     |
| <b>e35</b>         | -770.5050515 | 0.043173      | -770.461879     | 104.65                                    | 2     |
| <b>e36</b>         | -770.5021255 | 0.039041      | -770.463085     | 103.90                                    | 1     |
| <b>e45</b>         | -770.4597961 | 0.043529      | -770.416267     | 133.27                                    | 2     |
| <b>e46</b>         | -770.4620627 | 0.039219      | -770.422843     | 129.15                                    | 1     |
| <b>e56</b>         | -770.5297548 | 0.041313      | -770.488441     | 87.98                                     | 0     |
| <b>e67</b>         | -770.5041868 | 0.037475      | -770.466712     | 101.62                                    | 0     |

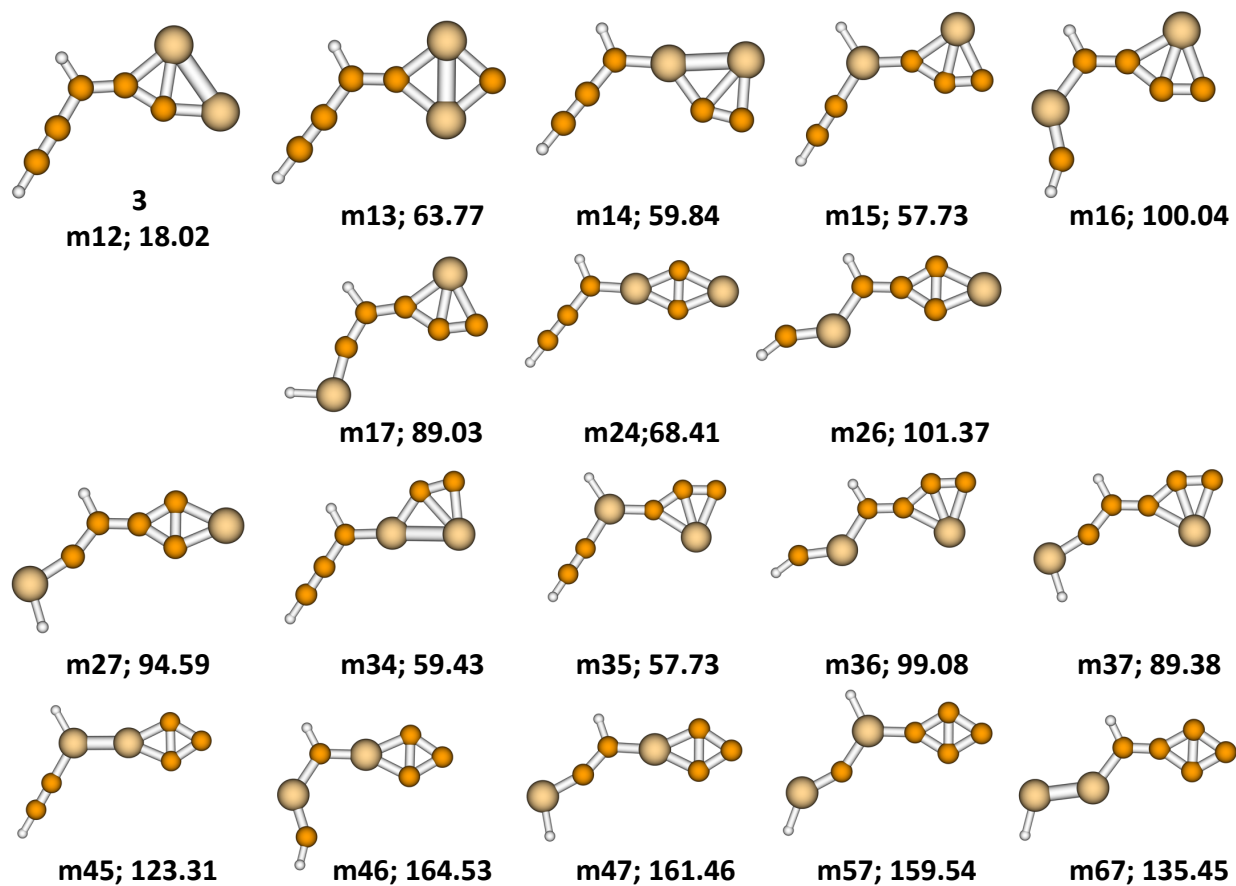

Figure S11: Various structural possibilities obtained for  $\text{Si}_2\text{C}_5\text{H}_2$  using the base  $\text{C}_7\text{H}_2$  geometry, 2-(ethynyl)methylenebicyclo[1.1.0]-but-1(3)-ene-4-ylidene.

Table S54: Computed energies of Si<sub>2</sub>C<sub>5</sub>H<sub>2</sub> isomers shown in Figure S11 in their singlet ground electronic states calculated at the B3LYP/6-311++G(2D,2P) level of theory.

| Isomer or<br>Label | $E$<br>a.u   | $ZPVE$<br>a.u | $E+ZPVE$<br>a.u | $\Delta E+ZPVE$<br>kcal mol <sup>-1</sup> | NImag |
|--------------------|--------------|---------------|-----------------|-------------------------------------------|-------|
| <b>1</b>           | -770.6783795 | 0.049725      | -770.628654     | 0.00                                      | 0     |
| <b>3; m12</b>      | -770.6467098 | 0.046777      | -770.599932     | 18.02                                     | 0     |
| <b>m13</b>         | -770.5723890 | 0.045355      | -770.527034     | 63.77                                     | 0     |
| <b>m14</b>         | -770.5771674 | 0.043881      | -770.533287     | 59.84                                     | 0     |
| <b>m15</b>         | -770.5782172 | 0.041556      | -770.536661     | 57.73                                     | 0     |
| <b>m16</b>         | -770.5128009 | 0.043568      | -770.469233     | 100.04                                    | 0     |
| <b>m17</b>         | -770.5271398 | 0.040358      | -770.486781     | 89.03                                     | 1     |
| <b>m24</b>         | -770.5640365 | 0.044406      | -770.519631     | 68.41                                     | 0     |
| <b>m26</b>         | -770.5108442 | 0.043733      | -770.467112     | 101.37                                    | 0     |
| <b>m27</b>         | -770.5185454 | 0.040623      | -770.477923     | 94.59                                     | 1     |
| <b>m34</b>         | -770.5776603 | 0.043707      | -770.533953     | 59.43                                     | 0     |
| <b>m35</b>         | -770.5781353 | 0.041472      | -770.536663     | 57.73                                     | 0     |
| <b>m36</b>         | -770.5141219 | 0.043363      | -770.470759     | 99.08                                     | 0     |
| <b>m37</b>         | -770.5264812 | 0.040263      | -770.486218     | 89.38                                     | 1     |
| <b>m45</b>         | -770.4713730 | 0.039222      | -770.432151     | 123.31                                    | 1     |
| <b>m46</b>         | -770.4067756 | 0.040316      | -770.366460     | 164.53                                    | 0     |
| <b>m47</b>         | -770.4080964 | 0.036743      | -770.371354     | 161.46                                    | 2     |
| <b>m57</b>         | -770.4096247 | 0.035207      | -770.374418     | 159.54                                    | 1     |
| <b>m67</b>         | -770.4521073 | 0.039311      | -770.412796     | 135.45                                    | 0     |

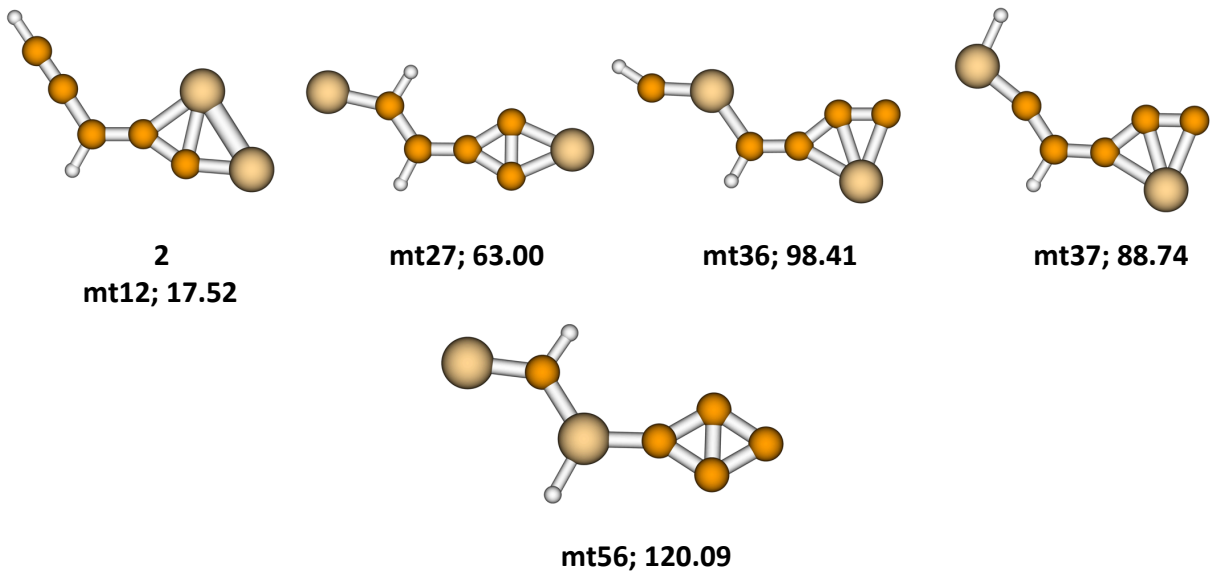

Figure S12: Various structural possibilities obtained for  $\text{Si}_2\text{C}_5\text{H}_2$  using the base  $\text{C}_7\text{H}_2$  geometry, 2-(ethynyl)methylenebicyclo[1.1.0]-but-1(3)-ene-4-ylidene.



Table S55: Computed energies of  $\text{Si}_2\text{C}_5\text{H}_2$  isomers shown in Figure S12 in their singlet ground electronic states calculated at the B3LYP/6-311++G(2D,2P) level of theory.

| Isomer or<br>Label | $E$<br>a.u   | $ZPVE$<br>a.u | $E+ZPVE$<br>a.u | $\Delta E+ZPVE$<br>kcal mol <sup>-1</sup> | NImag |
|--------------------|--------------|---------------|-----------------|-------------------------------------------|-------|
| <b>1</b>           | -770.6783795 | 0.049725      | -770.628654     | 0.00                                      | 0     |
| <b>2; mt12</b>     | -770.6473552 | 0.046621      | -770.600734     | 17.52                                     | 0     |
| <b>mt27</b>        | -770.5740532 | 0.045794      | -770.528259     | 63.00                                     | 0     |
| <b>mt36</b>        | -770.5153110 | 0.043477      | -770.471834     | 98.41                                     | 0     |
| <b>mt37</b>        | -770.5276882 | 0.040447      | -770.487241     | 88.74                                     | 1     |
| <b>mt56</b>        | -770.4761786 | 0.038907      | -770.437272     | 120.09                                    | 0     |

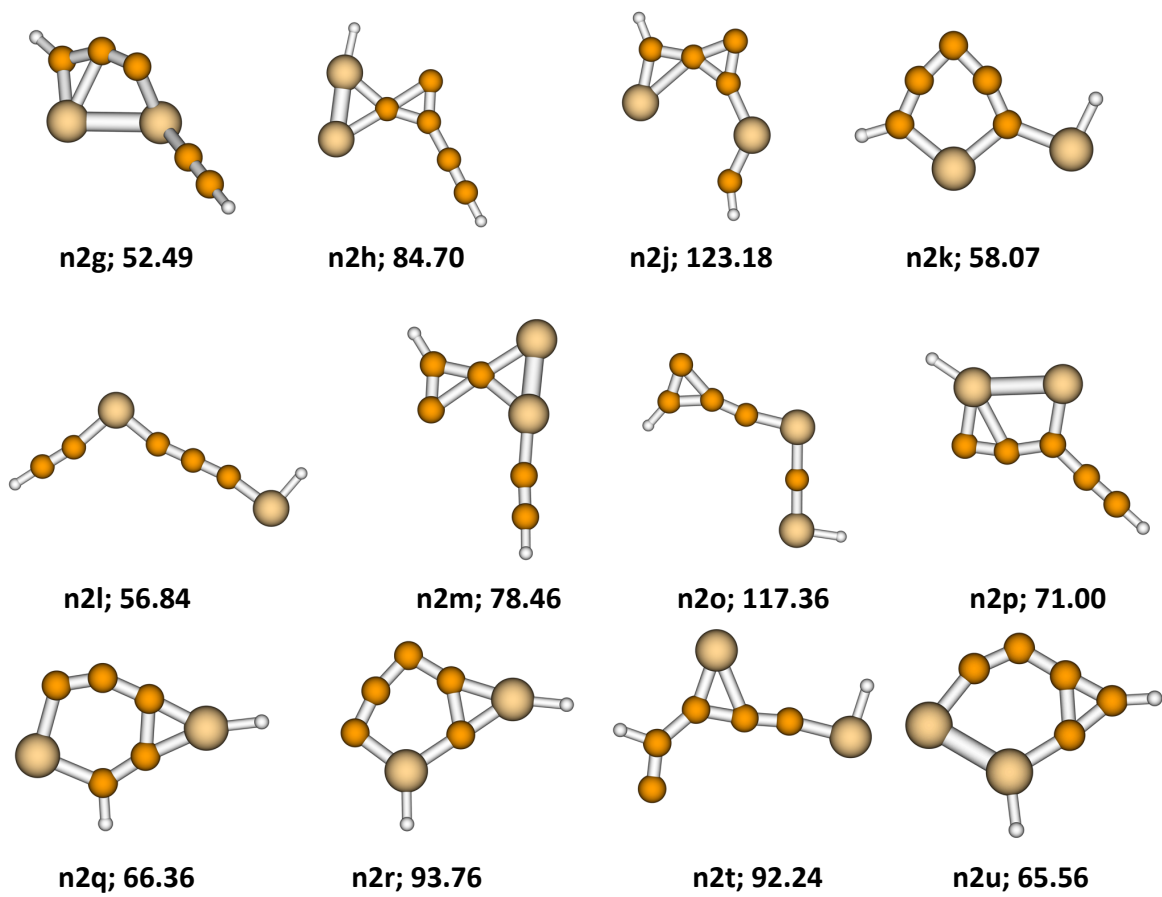

Figure S13: Various structural possibilities obtained for  $\text{Si}_2\text{C}_5\text{H}_2$  using the base  $\text{C}_7\text{H}_2$  geometry, 2,5-(didehydro)-1-ethynylspiro[2.2]penta-1,4-diene.

Table S56: Computed energies of Si<sub>2</sub>C<sub>5</sub>H<sub>2</sub> isomers shown in Figure S13 in their singlet ground electronic states calculated at the B3LYP/6-311++G(2D,2P) level of theory.

| Isomer or<br>Label | $E$<br>a.u   | $ZPVE$<br>a.u | $E+ZPVE$<br>a.u | $\Delta E+ZPVE$<br>kcal mol <sup>-1</sup> | NImag |
|--------------------|--------------|---------------|-----------------|-------------------------------------------|-------|
| <b>1</b>           | -770.6783795 | 0.049725      | -770.628654     | 0.00                                      | 0     |
| <b>n2g</b>         | -770.5889593 | 0.043952      | -770.545007     | 52.49                                     | 0     |
| <b>n2h</b>         | -770.5342756 | 0.040606      | -770.493670     | 84.70                                     | 0     |
| <b>n2j</b>         | -770.4744081 | 0.042061      | -770.432347     | 123.18                                    | 0     |
| <b>n2k</b>         | -770.5785420 | 0.042421      | -770.536121     | 58.07                                     | 0     |
| <b>n2l</b>         | -770.5779026 | 0.039831      | -770.538072     | 56.84                                     | 0     |
| <b>n2m</b>         | -770.5465314 | 0.042911      | -770.503620     | 78.46                                     | 0     |
| <b>n2o</b>         | -770.4793759 | 0.037755      | -770.441621     | 117.36                                    | 0     |
| <b>n2p</b>         | -770.5568807 | 0.041370      | -770.515510     | 71.00                                     | 1     |
| <b>n2q</b>         | -770.5653788 | 0.042476      | -770.522903     | 66.36                                     | 0     |
| <b>n2r</b>         | -770.5190269 | 0.039782      | -770.479245     | 93.76                                     | 1     |
| <b>n2t</b>         | -770.5206625 | 0.039000      | -770.481662     | 92.24                                     | 0     |
| <b>n2u</b>         | -770.5672881 | 0.043103      | -770.524185     | 65.56                                     | 0     |

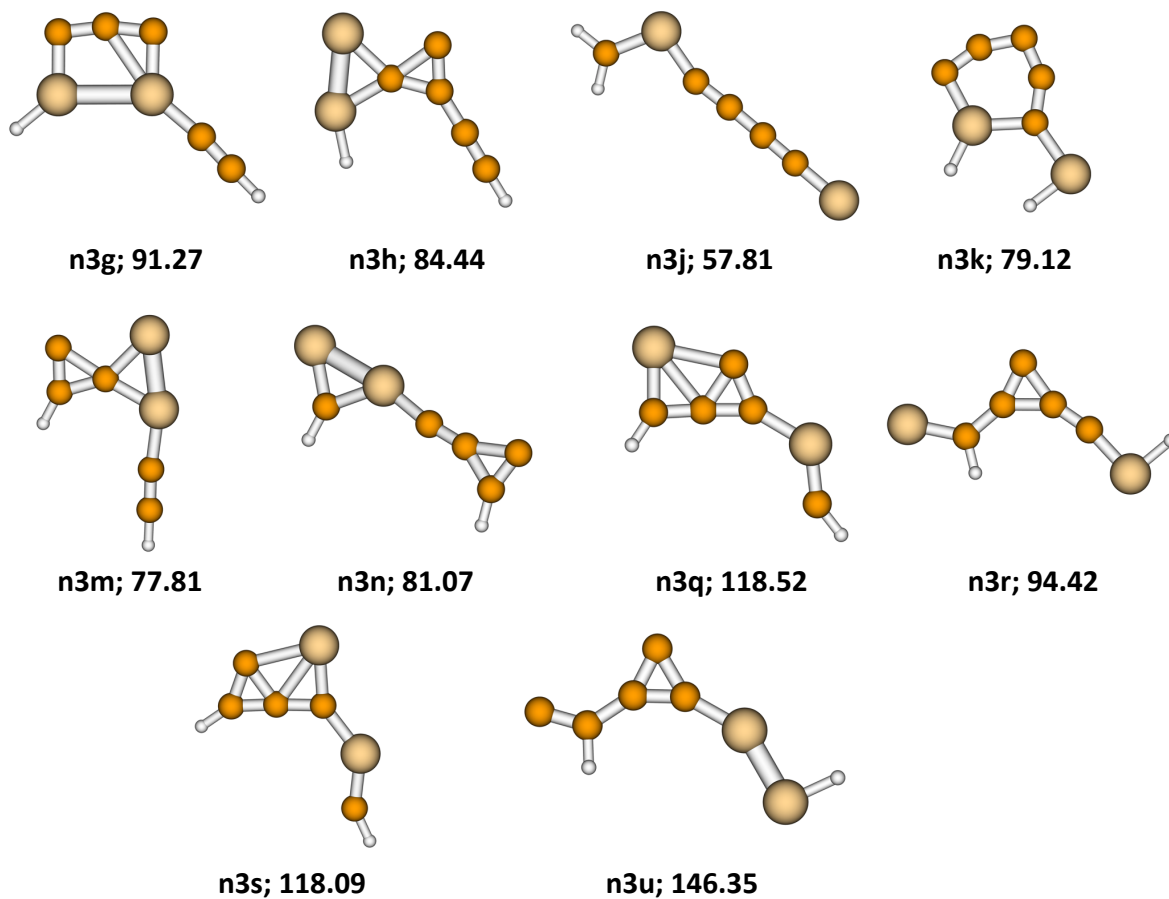

Figure S14: Various structural possibilities obtained for  $\text{Si}_2\text{C}_5\text{H}_2$  using the base  $\text{C}_7\text{H}_2$  geometry, 2,4-(didehydro)-1-ethynylspiro[2.2]penta-1,4-diene.

Table S57: Computed energies of Si<sub>2</sub>C<sub>5</sub>H<sub>2</sub> isomers shown in Figure S14 in their singlet ground electronic states calculated at the B3LYP/6-311++G(2D,2P) level of theory.

| Isomer or<br>Label | $E$<br>a.u   | $ZPVE$<br>a.u | $E+ZPVE$<br>a.u | $\Delta E+ZPVE$<br>kcal mol <sup>-1</sup> | NImag |
|--------------------|--------------|---------------|-----------------|-------------------------------------------|-------|
| <b>1</b>           | -770.6783795 | 0.049725      | -770.628654     | 0.00                                      | 0     |
| <b>n3g</b>         | -770.5243537 | 0.041142      | -770.483212     | 91.27                                     | 0     |
| <b>n3h</b>         | -770.5342560 | 0.040163      | -770.494093     | 84.44                                     | 0     |
| <b>n3j</b>         | -770.5809808 | 0.044460      | -770.536521     | 57.81                                     | 0     |
| <b>n3k</b>         | -770.5433660 | 0.040796      | -770.502570     | 79.12                                     | 0     |
| <b>n3m</b>         | -770.5472010 | 0.042553      | -770.504648     | 77.81                                     | 0     |
| <b>n3n</b>         | -770.5418273 | 0.042363      | -770.499464     | 81.07                                     | 0     |
| <b>n3q</b>         | -770.4819715 | 0.042192      | -770.439780     | 118.52                                    | 0     |
| <b>n3r</b>         | -770.5177352 | 0.039555      | -770.478181     | 94.42                                     | 0     |
| <b>n3s</b>         | -770.4824358 | 0.041976      | -770.440460     | 118.09                                    | 1     |
| <b>n3u</b>         | -770.4329822 | 0.037554      | -770.395428     | 146.35                                    | 1     |

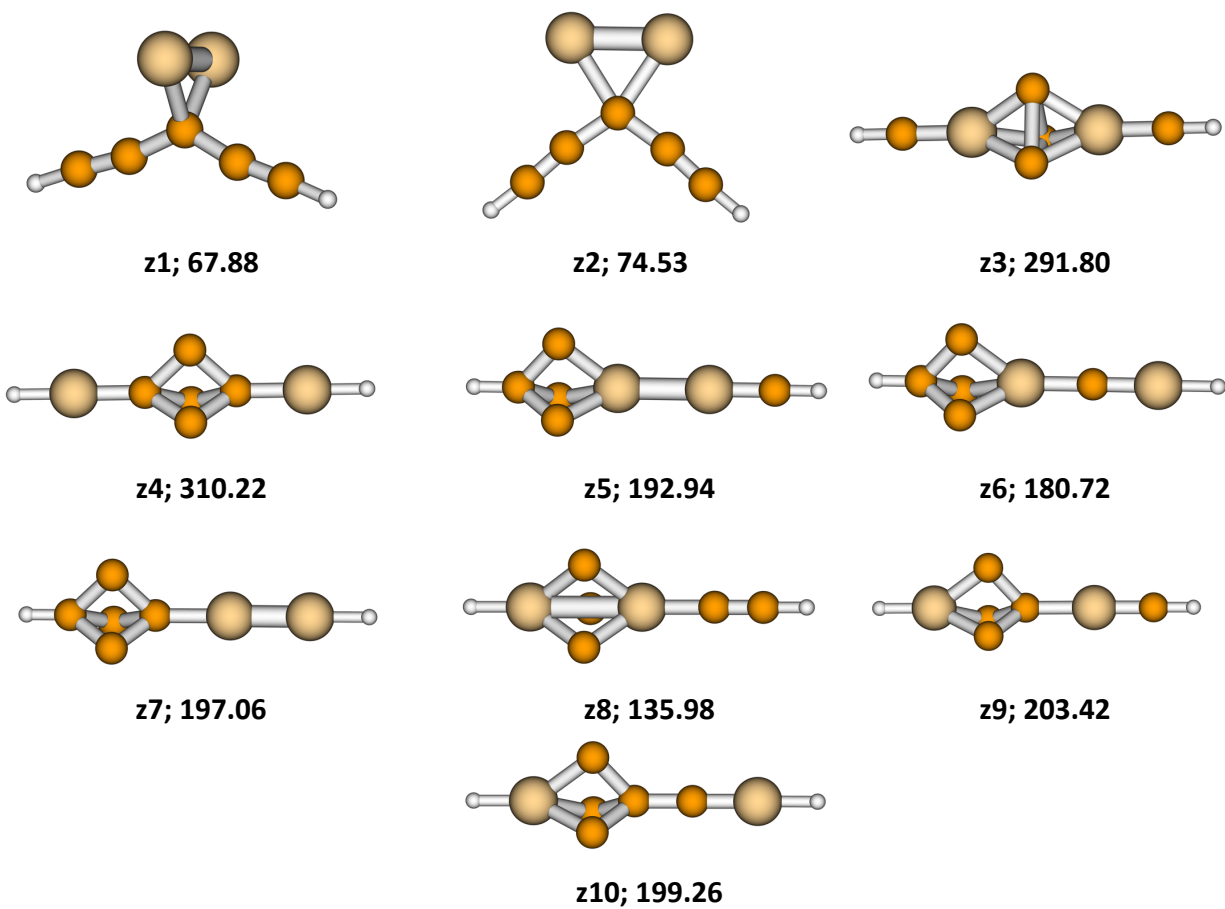

Figure S15: Various structural possibilities obtained for  $\text{Si}_2\text{C}_5\text{H}_2$  using the base  $\text{C}_5\text{H}_2$  geometry, pentacyclo[2.1.0.0<sup>1,3</sup>.0<sup>2,5</sup>.0<sup>3,5</sup>]pentane

Table S58: Computed energies of Si<sub>2</sub>C<sub>5</sub>H<sub>2</sub> isomers shown in Figure S15 in their singlet ground electronic states calculated at the B3LYP/6-311++G(2D,2P) level of theory.

| Isomer or<br>Label | $E$<br>a.u   | $ZPVE$<br>a.u | $E+ZPVE$<br>a.u | $\Delta E+ZPVE$<br>kcal mol <sup>-1</sup> | NImag |
|--------------------|--------------|---------------|-----------------|-------------------------------------------|-------|
| <b>1</b>           | -770.6783795 | 0.049725      | -770.628654     | 0.00                                      | 0     |
| <b>z1</b>          | -770.5642055 | 0.043722      | -770.520484     | 67.88                                     | 2     |
| <b>z2</b>          | -770.5533472 | 0.043471      | -770.509876     | 74.53                                     | 1     |
| <b>z3</b>          | -770.1980051 | 0.034365      | -770.163640     | 291.80                                    | 4     |
| <b>z4</b>          | -770.1640080 | 0.029714      | -770.134294     | 310.22                                    | 4     |
| <b>z5</b>          | -770.3623391 | 0.041149      | -770.321190     | 192.94                                    | 2     |
| <b>z6</b>          | -770.3796120 | 0.038953      | -770.340659     | 180.72                                    | 2     |
| <b>z7</b>          | -770.3545323 | 0.039915      | -770.314617     | 197.06                                    | 2     |
| <b>z8</b>          | -770.4524442 | 0.040486      | -770.411958     | 135.98                                    | 0     |
| <b>z9</b>          | -770.3422288 | 0.037750      | -770.304479     | 203.42                                    | 2     |
| <b>z10</b>         | -770.3470475 | 0.035933      | -770.311114     | 199.26                                    | 2     |

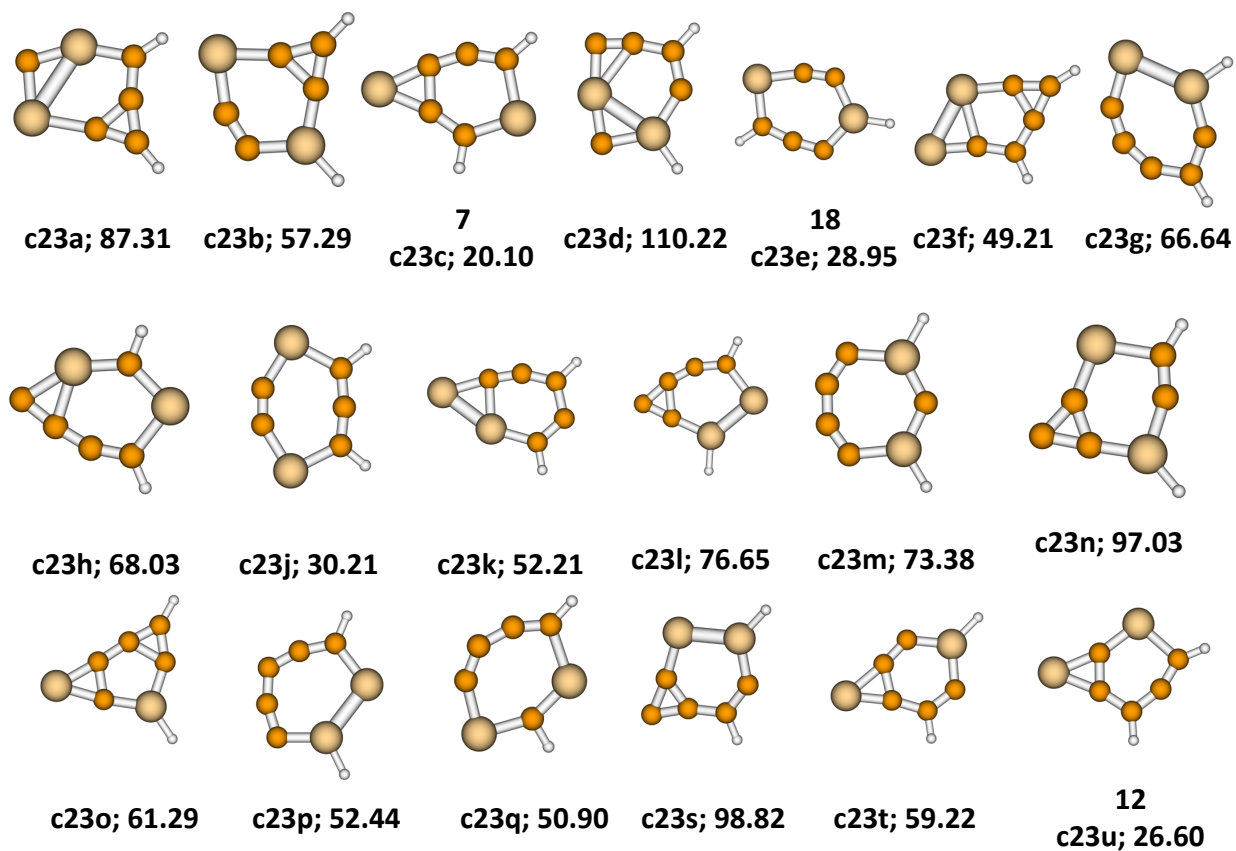

Figure S16: Various structural possibilities obtained for  $\text{Si}_2\text{C}_5\text{H}_2$  using the base  $\text{C}_7\text{H}_2$  geometry, 3,5-(didehydro)bicyclo[4.1.0]hepta-1(6),2,4-triene-7-ylidene.



Table S59: Computed energies of Si<sub>2</sub>C<sub>5</sub>H<sub>2</sub> isomers shown in Figure S16 in their singlet ground electronic states calculated at the B3LYP/6-311++G(2D,2P) level of theory.

| Isomer or<br>Label | $E$<br>a.u   | $ZPVE$<br>a.u | $E+ZPVE$<br>a.u | $\Delta E+ZPVE$<br>kcal mol <sup>-1</sup> | NImag |
|--------------------|--------------|---------------|-----------------|-------------------------------------------|-------|
| <b>1</b>           | -770.6783795 | 0.049725      | -770.628654     | 0.00                                      | 0     |
| <b>c23a</b>        | -770.5347469 | 0.045229      | -770.489518     | 87.31                                     | 0     |
| <b>c23b</b>        | -770.5802125 | 0.042859      | -770.537353     | 57.29                                     | 1     |
| <b>7; c23c</b>     | -770.6434198 | 0.046791      | -770.596629     | 20.10                                     | 0     |
| <b>c23d</b>        | -770.4954423 | 0.042432      | -770.453010     | 110.22                                    | 1     |
| <b>18; c23e</b>    | -770.6290167 | 0.046505      | -770.582512     | 28.95                                     | 0     |
| <b>c23f</b>        | -770.5972604 | 0.047023      | -770.550237     | 49.21                                     | 0     |
| <b>c23g</b>        | -770.5652507 | 0.042790      | -770.522460     | 66.64                                     | 0     |
| <b>c23h</b>        | -770.5644984 | 0.044264      | -770.520235     | 68.03                                     | 0     |
| <b>c23j</b>        | -770.6241664 | 0.043647      | -770.580519     | 30.21                                     | 1     |
| <b>c23k</b>        | -770.5915527 | 0.046106      | -770.545447     | 52.21                                     | 0     |
| <b>c23l</b>        | -770.5483746 | 0.041871      | -770.506504     | 76.65                                     | 0     |
| <b>c23m</b>        | -770.5527726 | 0.041052      | -770.511720     | 73.38                                     | 0     |
| <b>c23n</b>        | -770.5137820 | 0.039748      | -770.474034     | 97.03                                     | 1     |
| <b>c23o</b>        | -770.5743518 | 0.043367      | -770.530984     | 61.29                                     | 0     |
| <b>c23p</b>        | -770.5887595 | 0.043678      | -770.545082     | 52.44                                     | 0     |
| <b>c23q</b>        | -770.5920290 | 0.044491      | -770.547538     | 50.90                                     | 0     |
| <b>c23s</b>        | -770.5128938 | 0.041721      | -770.471173     | 98.82                                     | 1     |
| <b>c23t</b>        | -770.5784321 | 0.044156      | -770.534276     | 59.22                                     | 0     |
| <b>12; c23u</b>    | -770.6323326 | 0.046074      | -770.586259     | 26.60                                     | 0     |

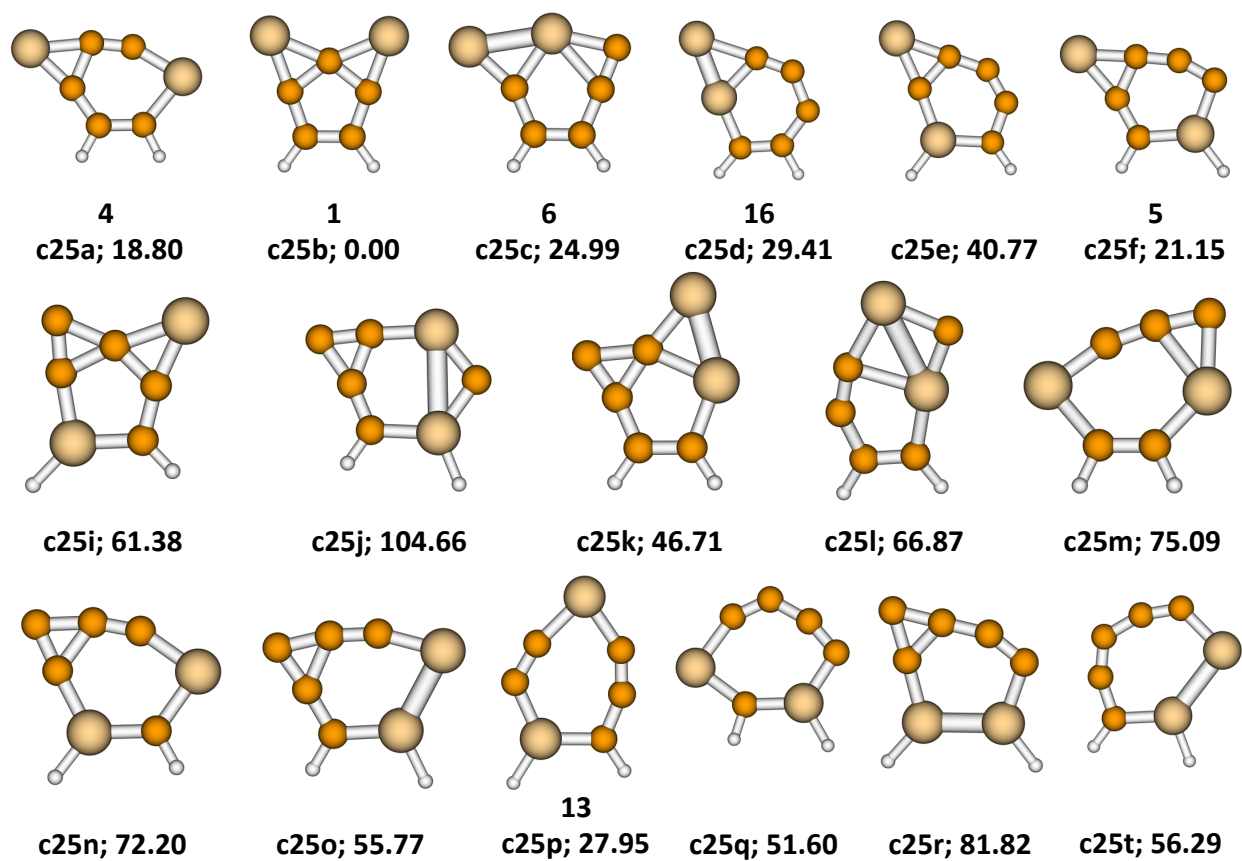

Figure S17: Various structural possibilities obtained for  $\text{Si}_2\text{C}_5\text{H}_2$  using the base  $\text{C}_7\text{H}_2$  geometry, bicyclo[4.1.0]hepta-1(6),4(5)-diene-2(3)-yne-7-ylidene.

Table S60: Computed energies of Si<sub>2</sub>C<sub>5</sub>H<sub>2</sub> isomers shown in Figure S17 in their singlet ground electronic states calculated at the B3LYP/6-311++G(2D,2P) level of theory.

| Isomer or<br>Label | $E$<br>a.u   | $ZPVE$<br>a.u | $E+ZPVE$<br>a.u | $\Delta E+ZPVE$<br>kcal mol <sup>-1</sup> | NImag |
|--------------------|--------------|---------------|-----------------|-------------------------------------------|-------|
| <b>4; c25a</b>     | -770.6468126 | 0.048113      | -770.598699     | 18.80                                     | 0     |
| <b>1; c25b</b>     | -770.6783795 | 0.049725      | -770.628654     | 0.00                                      | 0     |
| <b>6; c25c</b>     | -770.6366832 | 0.047858      | -770.588825     | 24.99                                     | 0     |
| <b>16; c25d</b>    | -770.6300475 | 0.048269      | -770.581779     | 29.41                                     | 0     |
| <b>c25e</b>        | -770.6082254 | 0.044550      | -770.563675     | 40.77                                     | 0     |
| <b>5; c25f</b>     | -770.6405389 | 0.045596      | -770.594943     | 21.15                                     | 0     |
| <b>c25i</b>        | -770.5737679 | 0.042933      | -770.530835     | 61.38                                     | 0     |
| <b>c25j</b>        | -770.5034721 | 0.041605      | -770.461867     | 104.66                                    | 1     |
| <b>c25k</b>        | -770.6013334 | 0.047116      | -770.554218     | 46.71                                     | 0     |
| <b>c25l</b>        | -770.5684716 | 0.046385      | -770.522087     | 66.87                                     | 0     |
| <b>c25m</b>        | -770.5540906 | 0.045107      | -770.508984     | 75.09                                     | 0     |
| <b>c25n</b>        | -770.5555843 | 0.041989      | -770.513595     | 72.20                                     | 0     |
| <b>c25o</b>        | -770.5828171 | 0.043042      | -770.539775     | 55.77                                     | 0     |
| <b>13; c25p</b>    | -770.6281327 | 0.044012      | -770.584120     | 27.95                                     | 0     |
| <b>c25q</b>        | -770.5896321 | 0.043206      | -770.546426     | 51.60                                     | 0     |
| <b>c25r</b>        | -770.5381368 | 0.039875      | -770.498262     | 81.82                                     | 0     |
| <b>c25t</b>        | -770.5816653 | 0.042711      | -770.538954     | 56.29                                     | 0     |

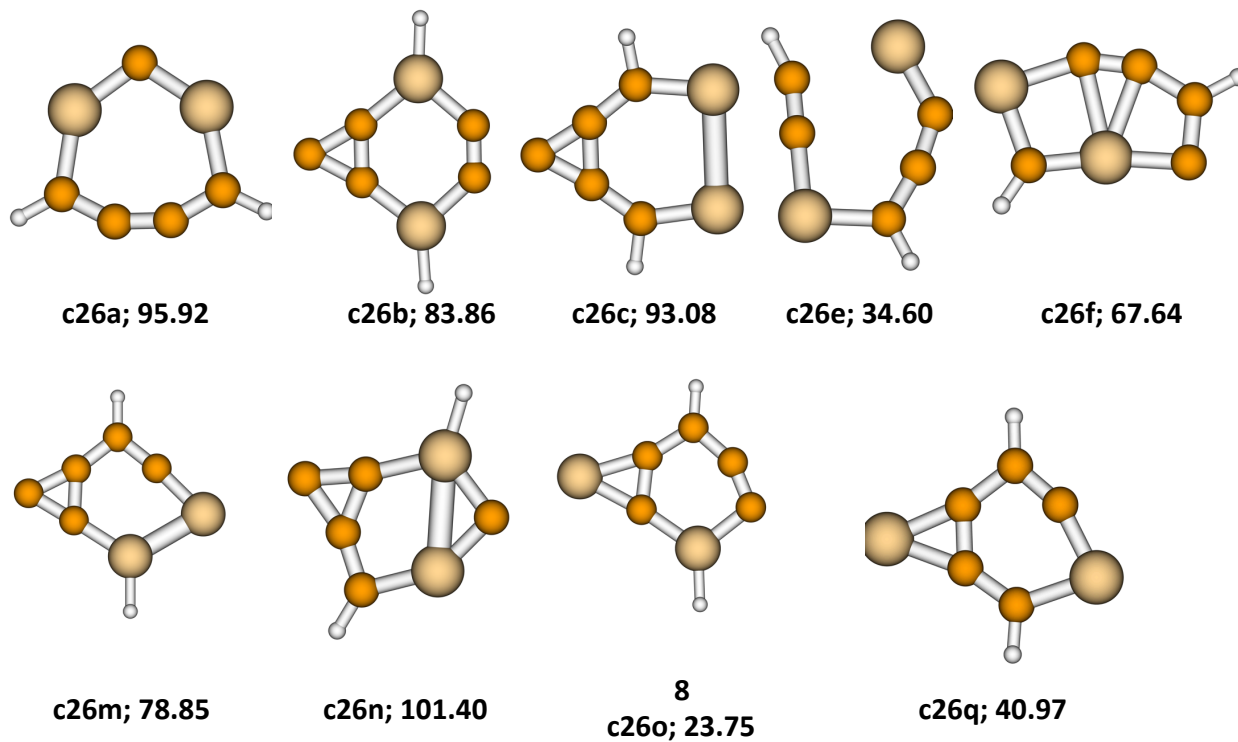

Figure S18: Various structural possibilities obtained for  $\text{Si}_2\text{C}_5\text{H}_2$  using the base  $\text{C}_7\text{H}_2$  geometry, bicyclo[4.1.0]hepta-1,5-diene-3-yne-7-ylidene.

Table S61: Computed energies of Si<sub>2</sub>C<sub>5</sub>H<sub>2</sub> isomers shown in Figure S18 in their singlet ground electronic states calculated at the B3LYP/6-311++G(2D,2P) level of theory.

| Isomer or<br>Label | $E$<br>a.u   | $ZPVE$<br>a.u | $E+ZPVE$<br>a.u | $\Delta E+ZPVE$<br>kcal mol <sup>-1</sup> | NImag |
|--------------------|--------------|---------------|-----------------|-------------------------------------------|-------|
| <b>1</b>           | -770.6783795 | 0.049725      | -770.628654     | 0.00                                      | 0     |
| <b>c26a</b>        | -770.5195310 | 0.043742      | -770.475789     | 95.92                                     | 2     |
| <b>c26b</b>        | -770.5342798 | 0.039272      | -770.495007     | 83.86                                     | 0     |
| <b>c26c</b>        | -770.5204216 | 0.040101      | -770.480320     | 93.08                                     | 3     |
| <b>c26e</b>        | -770.6182454 | 0.044732      | -770.573514     | 34.60                                     | 0     |
| <b>c26f</b>        | -770.5664597 | 0.045589      | -770.520870     | 67.64                                     | 0     |
| <b>c26m</b>        | -770.5456798 | 0.042677      | -770.503003     | 78.85                                     | 0     |
| <b>c26n</b>        | -770.5091319 | 0.042065      | -770.467067     | 101.40                                    | 0     |
| <b>8; c26o</b>     | -770.6366782 | 0.045878      | -770.590800     | 23.75                                     | 0     |
| <b>c26q</b>        | -770.6101113 | 0.046742      | -770.563369     | 40.97                                     | 0     |

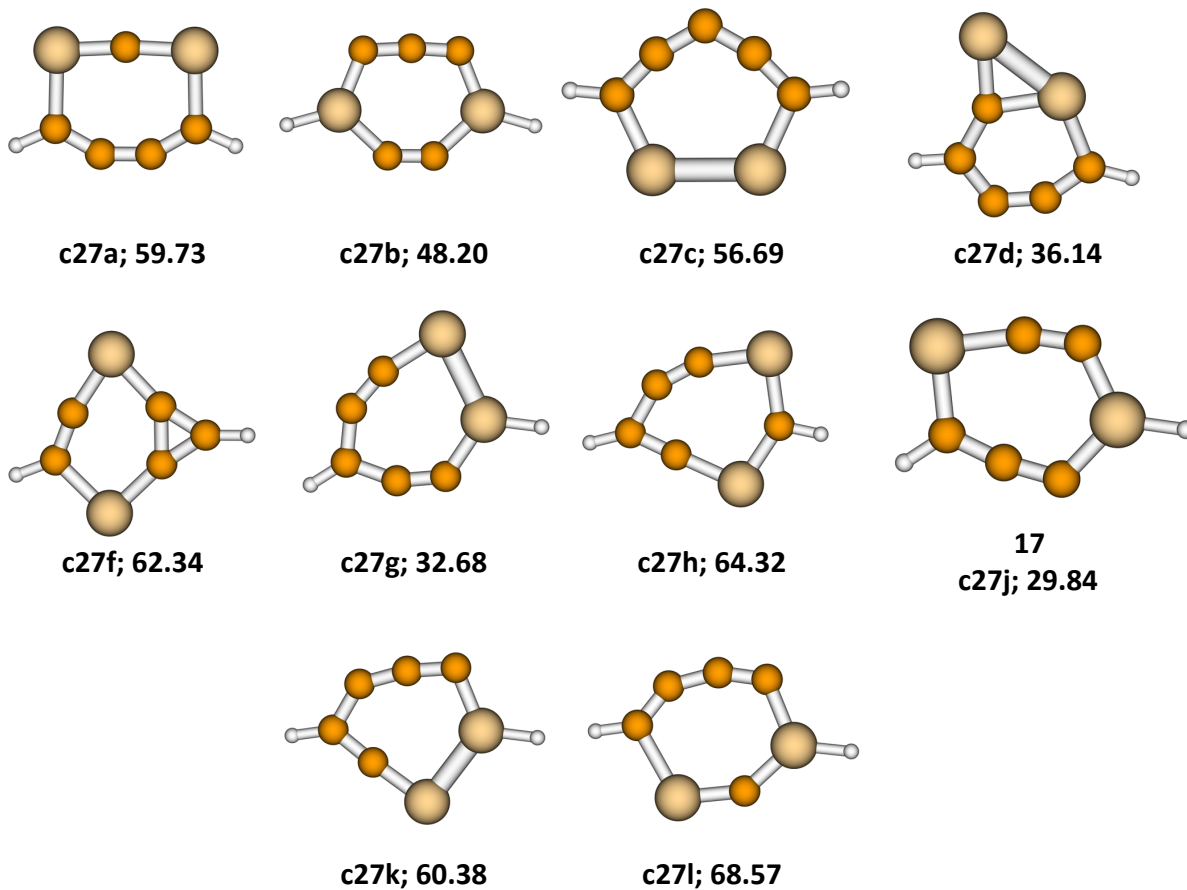

Figure S19: Various structural possibilities obtained for  $\text{Si}_2\text{C}_5\text{H}_2$  using the base  $\text{C}_7\text{H}_2$  geometry, cyclohepta-1,2,3,4-tetraene-6-yne.

Table S62: Computed energies of Si<sub>2</sub>C<sub>5</sub>H<sub>2</sub> isomers shown in Figure S19 in their singlet ground electronic states calculated at the B3LYP/6-311++G(2D,2P) level of theory.

| Isomer or<br>Label | $E$<br>a.u   | $ZPVE$<br>a.u | $E+ZPVE$<br>a.u | $\Delta E+ZPVE$<br>kcal mol <sup>-1</sup> | NImag |
|--------------------|--------------|---------------|-----------------|-------------------------------------------|-------|
| <b>1</b>           | -770.6783795 | 0.049725      | -770.628654     | 0.00                                      | 0     |
| <b>c27a</b>        | -770.5791516 | 0.045680      | -770.533472     | 59.73                                     | 0     |
| <b>c27b</b>        | -770.5937085 | 0.041860      | -770.551849     | 48.20                                     | 0     |
| <b>c27c</b>        | -770.5834950 | 0.045181      | -770.538314     | 56.69                                     | 0     |
| <b>c27d</b>        | -770.6187115 | 0.047646      | -770.571065     | 36.14                                     | 0     |
| <b>c27f</b>        | -770.5735532 | 0.044248      | -770.529305     | 62.34                                     | 0     |
| <b>c27g</b>        | -770.6213075 | 0.044733      | -770.576574     | 32.68                                     | 0     |
| <b>c27h</b>        | -770.5711212 | 0.044963      | -770.526158     | 64.32                                     | 0     |
| <b>17; c27j</b>    | -770.6253429 | 0.044247      | -770.581096     | 29.84                                     | 0     |
| <b>c27k</b>        | -770.5761218 | 0.043684      | -770.532438     | 60.38                                     | 0     |
| <b>c27l</b>        | -770.5621512 | 0.042766      | -770.519385     | 68.57                                     | 0     |

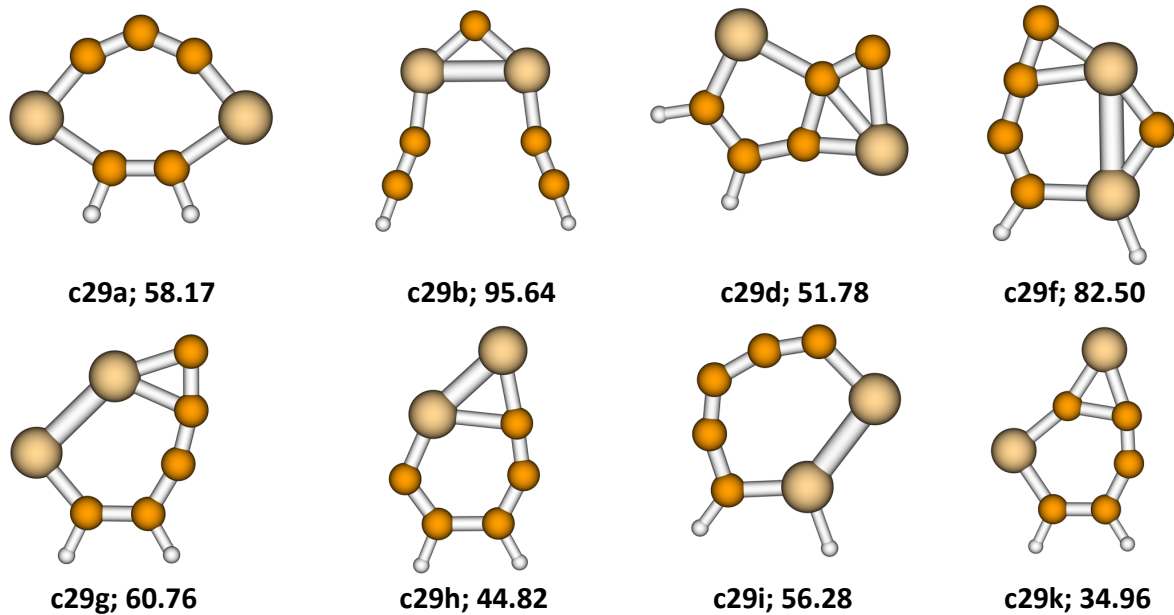

Figure S20: Various structural possibilities obtained for  $\text{Si}_2\text{C}_5\text{H}_2$  using the base  $\text{C}_7\text{H}_2$  geometry, bicyclo[4.1.0]hepta-1,2,4,5-tetraene-7-ylidene.



Table S63: Computed energies of Si<sub>2</sub>C<sub>5</sub>H<sub>2</sub> isomers shown in Figure S20 in their singlet ground electronic states calculated at the B3LYP/6-311++G(2D,2P) level of theory.

| Isomer or<br>Label | $E$<br>a.u   | $ZPVE$<br>a.u | $E+ZPVE$<br>a.u | $\Delta E+ZPVE$<br>kcal mol <sup>-1</sup> | NImag |
|--------------------|--------------|---------------|-----------------|-------------------------------------------|-------|
| <b>1</b>           | -770.6783795 | 0.049725      | -770.628654     | 0.00                                      | 0     |
| <b>c29a</b>        | -770.5814188 | 0.045467      | -770.535952     | 58.17                                     | 0     |
| <b>c29b</b>        | -770.5176415 | 0.041398      | -770.476243     | 95.64                                     | 2     |
| <b>c29d</b>        | -770.5917338 | 0.045595      | -770.546138     | 51.78                                     | 0     |
| <b>c29f</b>        | -770.5400690 | 0.042891      | -770.497178     | 82.50                                     | 0     |
| <b>c29g</b>        | -770.5781069 | 0.046277      | -770.531829     | 60.76                                     | 0     |
| <b>c29h</b>        | -770.6045876 | 0.047360      | -770.557228     | 44.82                                     | 0     |
| <b>c29i</b>        | -770.5816669 | 0.042706      | -770.538961     | 56.28                                     | 0     |
| <b>c29k</b>        | -770.6197288 | 0.046794      | -770.572935     | 34.96                                     | 0     |
